# Supplementary material for: Synthesis of norbornane bisether antibiotics via silver-mediated alkylation
Source: Royal Society of Chemistry journal article supplement (doi:10.1039/c5ra03321g), 2015-01-01
Supplement: c5ra03321g1.pdf [file c5ra03321g1.pdf]

## Synthesis of Norbornane Bisether Antibiotics via Silver-mediated Alkylation

Shane M. Hickey,<sup>†</sup> Trent D. Ashton,<sup>†</sup> Jonathan M. White,<sup>‡</sup> Jian Li,<sup>§</sup> Roger L. Nation,<sup>§</sup> Heidi Y. Yu<sup>§</sup> Alysha G. Elliott,<sup>#</sup> Mark S. Butler,<sup>#</sup> Johnny X. Huang,<sup>#</sup> Matthew A. Cooper,<sup>#</sup> and Frederick M. Pfeffer<sup>\*,†</sup>

<sup>†</sup>*Research Centre for Chemistry and Biotechnology, School of Life and Environmental Sciences, Deakin University, Waurn Ponds, Victoria, 3216, Australia,*

<sup>‡</sup>*Bio21 Institute, School of Chemistry, University of Melbourne, Parkville, Victoria, 3010, Australia,*

<sup>§</sup>*Drug Delivery, Disposition and Dynamics, Monash Institute of Pharmaceutical Science, Royal Parade, Parkville, Victoria, 3052, Australia and,*

<sup>#</sup>*Institute for Molecular Bioscience, The University of Queensland, Brisbane, Queensland, 4072, Australia.*

*fred.pfeffer@deakin.edu.au*

### CONTENTS

|                                                                                       |       |
|---------------------------------------------------------------------------------------|-------|
| • Experimental data for all known compounds                                           | p 3   |
| • <sup>1</sup> H, <sup>13</sup> C and <sup>19</sup> F NMR spectra for novel compounds | p 7   |
| • Variable Temperature (VT) NMR spectra (Figures <b>S1–5</b> ) for <b>12c</b>         | p 93  |
| • Table <b>S1</b> showing how much mixed ester was formed during alkylation           | p 98  |
| • Crystallography data for <b>12h</b>                                                 | p 100 |
| • Table <b>S2</b> containing a list of all bacterial strains tested                   | p 101 |
| • References                                                                          | p 102 |

All norbornane-based compounds are named using the Von-Baeyer system of nomenclature.<sup>1</sup> All other parts of the structure are named following the IUPAC guidelines. Numbering of norbornane protons follows the general structure shown below. Protons on carbon 7 are labelled either *syn* (*s*) or *anti* (*a*).

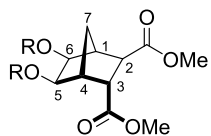

## 2-Methylisothiuronium iodide<sup>2</sup> (**18**)

[CAS Reg. No. 14257-47-7]

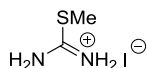

A mixture of thiourea (10.098 g, 0.133 mol), iodomethane (8.2 mL, 0.133 mol) and MeOH (100 mL) was heated at 65 °C for 90 min. The MeOH was removed *in vacuo* and the resulting yellow solid was transferred to a sintered glass funnel and washed with Et<sub>2</sub>O (5 × 50 mL) under vacuum to afford compound **18** (28.261 g, 99%) as an amorphous white powder.

m.p: 115.3–117.6 °C (lit. 117 °C).<sup>3</sup>

<sup>1</sup>H NMR (270 MHz, DMSO-*d*<sub>6</sub>) δ 2.56 (3H, s, CH<sub>3</sub>), 8.89 (4H, br s, NH<sub>2</sub>).

<sup>13</sup>C NMR (67.5 MHz, DMSO-*d*<sub>6</sub>) δ 13.3, 171.1.

## *N,N'*-Bis(*tert*-butoxycarbonyl)-*S*-methylisothiurea<sup>2</sup> (**19**)

[CAS Reg. No. 107819-90-9]

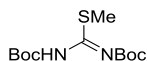

To a stirring solution of 2-methylisothiuronium iodide **18** (9.820 g, 45.03 mmol) in sat. NaHCO<sub>3</sub> (50 mL) and CH<sub>2</sub>Cl<sub>2</sub> (105 mL) was added Boc<sub>2</sub>O (19.668 g, 90.12 mmol) using CH<sub>2</sub>Cl<sub>2</sub> (3 × 25 mL). After 48 h the reaction mixture was transferred to a separatory funnel and the organic phase was isolated and the aqueous phase was extracted using CH<sub>2</sub>Cl<sub>2</sub> (2 × 50 mL). The combined organic phase was dried (MgSO<sub>4</sub>), filtered, and concentrated *in vacuo*. The crude solid was stirred (EtOH/H<sub>2</sub>O, 1:9, 100 mL) for 1 h before the mixture was cooled to 0 °C and solid was collected by vacuum filtration, washing with H<sub>2</sub>O (EtOH/H<sub>2</sub>O, 1:9, 50 mL) gives the title compound (12.257 g, 94%) as a white powder.

m.p: 122.3–123.8 °C (lit. 127 °C).<sup>4</sup>

<sup>1</sup>H NMR (270 MHz, CDCl<sub>3</sub>) δ 1.51 (9H, br s, *t*-Bu), 1.53 (9H, br s, *t*-Bu), 2.40 (3H, s, CH<sub>3</sub>), 11.61 (1H, br s, NH).

<sup>13</sup>C NMR (100 MHz, CDCl<sub>3</sub>) δ 14.6, 28.2, 81.1, 83.4, 150.9, 160.9, 171.6.

HRMS (ESI, *m/z*) for C<sub>12</sub>H<sub>22</sub>N<sub>2</sub>O<sub>4</sub>S [M + Na]<sup>+</sup> calc. 313.1193; found 313.1186.

## 2-[2,3-Bis(*tert*-butoxycarbonyl)guanidino]ethylamine<sup>5</sup> (**14**)

[CAS Reg. No. 203258-44-0]

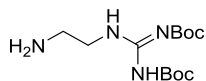

A solution of *N,N'*-Bis(*tert*-butoxycarbonyl)-*S*-methylisothiurea **19** (20.404 g, 70.27 mmol) in CH<sub>2</sub>Cl<sub>2</sub> (110 mL) was added in one portion to a stirred solution of 1,2-ethylenediamine (11.7 mL, 176 mmol) in CH<sub>2</sub>Cl<sub>2</sub> (150 mL). The reaction was allowed to stir at 21 °C for 90 min. The reaction mixture was then transferred to a separatory funnel and washed with H<sub>2</sub>O (2 × 80 mL), brine (80 mL), then dried (MgSO<sub>4</sub>) and filtered. The solvent was removed *in vacuo* at ambient temperature to afford **14** (20.696 g, 97%) as a white powder.

m.p: 96.2–100.1 °C.

<sup>1</sup>H NMR (270 MHz, CDCl<sub>3</sub>) δ 1.50 (9H, br s, *t*-Bu), 1.51 (9H, br s, *t*-Bu), 2.90 (2H, t, *J* = 6.2 Hz, CH<sub>2</sub>), 3.49 (2H, app. q, *J*<sub>app</sub> = 5.5 Hz, CH<sub>2</sub>), 8.67 (1H, br s, NH), 11.51 (1H, br s, NH).

<sup>13</sup>C NMR (67.5 MHz, CDCl<sub>3</sub>) δ 28.2, 28.4, 41.1, 43.5, 79.4, 83.2, 153.3, 156.5, 163.7.

HRMS (ESI, *m/z*) for C<sub>13</sub>H<sub>26</sub>N<sub>4</sub>O<sub>4</sub> [M + H]<sup>+</sup> calc. 303.2027; found 303.2032.

### Dimethyl bicyclo[2.2.1]hept-5-ene-3-endo-2-exo-dicarboxylate (**17**)

[CAS Reg. No. 3014-58-2]

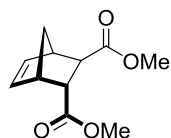

#### Method A<sup>6</sup>

To the stirring solution of dimethyl fumarate (65.290 g, 0.453 mol) in THF (200 mL), was added freshly cracked cyclopentadiene (40 mL, 0.476 mol), and the reaction was stirred at ambient temperature for 16 h. The solvent was removed under reduced pressure to give the title compound (95.230 g, 99%) as a clear oil.

#### Method B<sup>7</sup>

A 35 mL microwave vial was charged with dicyclopentadiene (2.0 mL, 15.0 mmol), dimethyl fumarate (2.883 g, 20.0 mmol) and hydroquinone (100 mg, 0.90 mmol), and heated using microwave irradiation to 150 °C for 2 h. The resulting orange oil was purified by flash column chromatography (10% EtOAc in pet. spirits) to give a clear oil (4.137 g, 98%).

*R*<sub>f</sub> = 0.32 (10% EtOAc in pet. spirits).



$^1\text{H}$  NMR (400 MHz,  $\text{CDCl}_3$ )  $\delta$  1.45 (1H, dd,  $J = 8.8, 1.7$  Hz,  $\text{H7s}$ ), 1.61 (1H, d,  $J = 8.8$  Hz,  $\text{H7a}$ ), 2.68 (1H, dd,  $J = 3.1, 1.2$  Hz,  $\text{H2}$ ), 3.12 (1H, br s,  $\text{H4}$ ), 3.25 (1H, br s,  $\text{H1}$ ), 3.37 (1H, app. t,  $J = 5.6$  Hz,  $\text{H3}$ ), 3.64 (3H, s, Me), 3.71 (3H, s, Me), 6.06 (1H, dd,  $J = 5.6, 2.8$  Hz,  $\text{H6}$ ), 6.27 (1H, dd,  $J = 5.6, 3.1$  Hz,  $\text{H5}$ ).

$^{13}\text{C}$  NMR (100 MHz,  $\text{CDCl}_3$ )  $\delta$  45.5, 46.9, 47.2, 47.5, 47.7, 51.7, 51.9, 135.3, 137.7, 174.0, 175.2.

HRMS (ESI,  $m/z$ ) for  $\text{C}_{11}\text{H}_{14}\text{O}_4$   $[\text{M} + \text{Na}]^+$  calc. 233.0784; found 233.0785.

### Dimethyl 5,6-*exo*-dihydroxybicyclo[2.2.1]heptane-3-*endo*-2-*exo*-dicarboxylate (**6**)

[CAS Reg. No. 1228039-59-5]

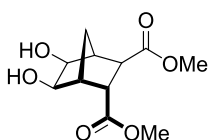

#### Method A<sup>8</sup>

The dimethyl ester **17** (3.054 g, 14.53 mmol) and  $\text{NMO} \cdot \text{H}_2\text{O}$  (1.87 g, 16.0 mmol) were dissolved in a solution of  $\text{H}_2\text{O}$ /acetone (1:4, 36 mL) to which  $\text{OsO}_4$  (4% in  $\text{H}_2\text{O}$ , 730  $\mu\text{L}$ , 0.40 mol%) was added. The reaction was stirred for 3 d and was then quenched with sat.  $\text{NaHSO}_3$  (30 mL). The suspension was extracted with EtOAc ( $4 \times 25$  mL), and the combined organic phase was washed with brine (25 mL), dried ( $\text{MgSO}_4$ ), filtered, and concentrated *in vacuo* to give the title compound (3.337 g, 94%) as a white solid.

#### Method B<sup>9</sup>

To a stirring solution at 0 °C of dimethyl ester **17** (270 mg, 1.28 mmol), *t*-BuOH (4.7 mL) and  $\text{H}_2\text{O}$  (1.2 mL), a solution of  $\text{KMnO}_4$  (405 mg, 2.56 mmol),  $\text{K}_2\text{CO}_3$  (212 mg, 1.54 mmol) in  $\text{H}_2\text{O}$  (6.0 mL) was added dropwise. The reaction was stirred for a further 25 min before the reaction mix was quenched with sat.  $\text{NaHSO}_3$  (25 mL) and extracted with EtOAc ( $3 \times 20$  mL). The combined organic phase was washed with brine (20 mL), dried ( $\text{MgSO}_4$ ), filtered, and concentrated *in vacuo* to afford the title compound (181 mg, 58%) as a white solid.

m.p: 89.9–92.3 °C (lit. 81–84 °C).<sup>8</sup>

$^1\text{H}$  NMR (270 MHz,  $\text{CDCl}_3$ )  $\delta$  1.33 (1H, d,  $J = 11.0$  Hz,  $\text{H7s}$ ), 1.78 (1H, dd,  $J = 11.0, 1.2$  Hz,  $\text{H7a}$ ), 2.40 (1H, br s,  $\text{H1}$ ), 2.46 (1H, dd,  $J = 4.5, 1.2$  Hz,  $\text{H4}$ ), 2.63 (1H, d,  $J = 4.9$  Hz,  $\text{H2}$ ), 3.11 (1H, app. t,  $J = 5.1$  Hz,  $\text{H3}$ ), 3.62 (3H, s, Me), 3.64 (3H, s, Me), 3.71–3.77 (1H, m,  $\text{H6}$ ), 3.85 (1H, br s,  $\text{H5}$ ).

$^{13}\text{C}$  NMR (67.5 MHz,  $\text{CDCl}_3$ )  $\delta$  31.8, 44.8, 46.2, 46.4, 48.2, 52.3, 52.5, 70.2, 73.3, 173.2, 174.2.

HRMS (ESI,  $m/z$ ) for  $\text{C}_{11}\text{H}_{16}\text{O}_6$   $[\text{M} + \text{Na}]^+$  calc. 267.0839; found 267.0836.



Shane/SMH04-159B  
Single Pulse Experiment

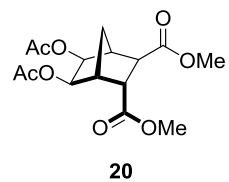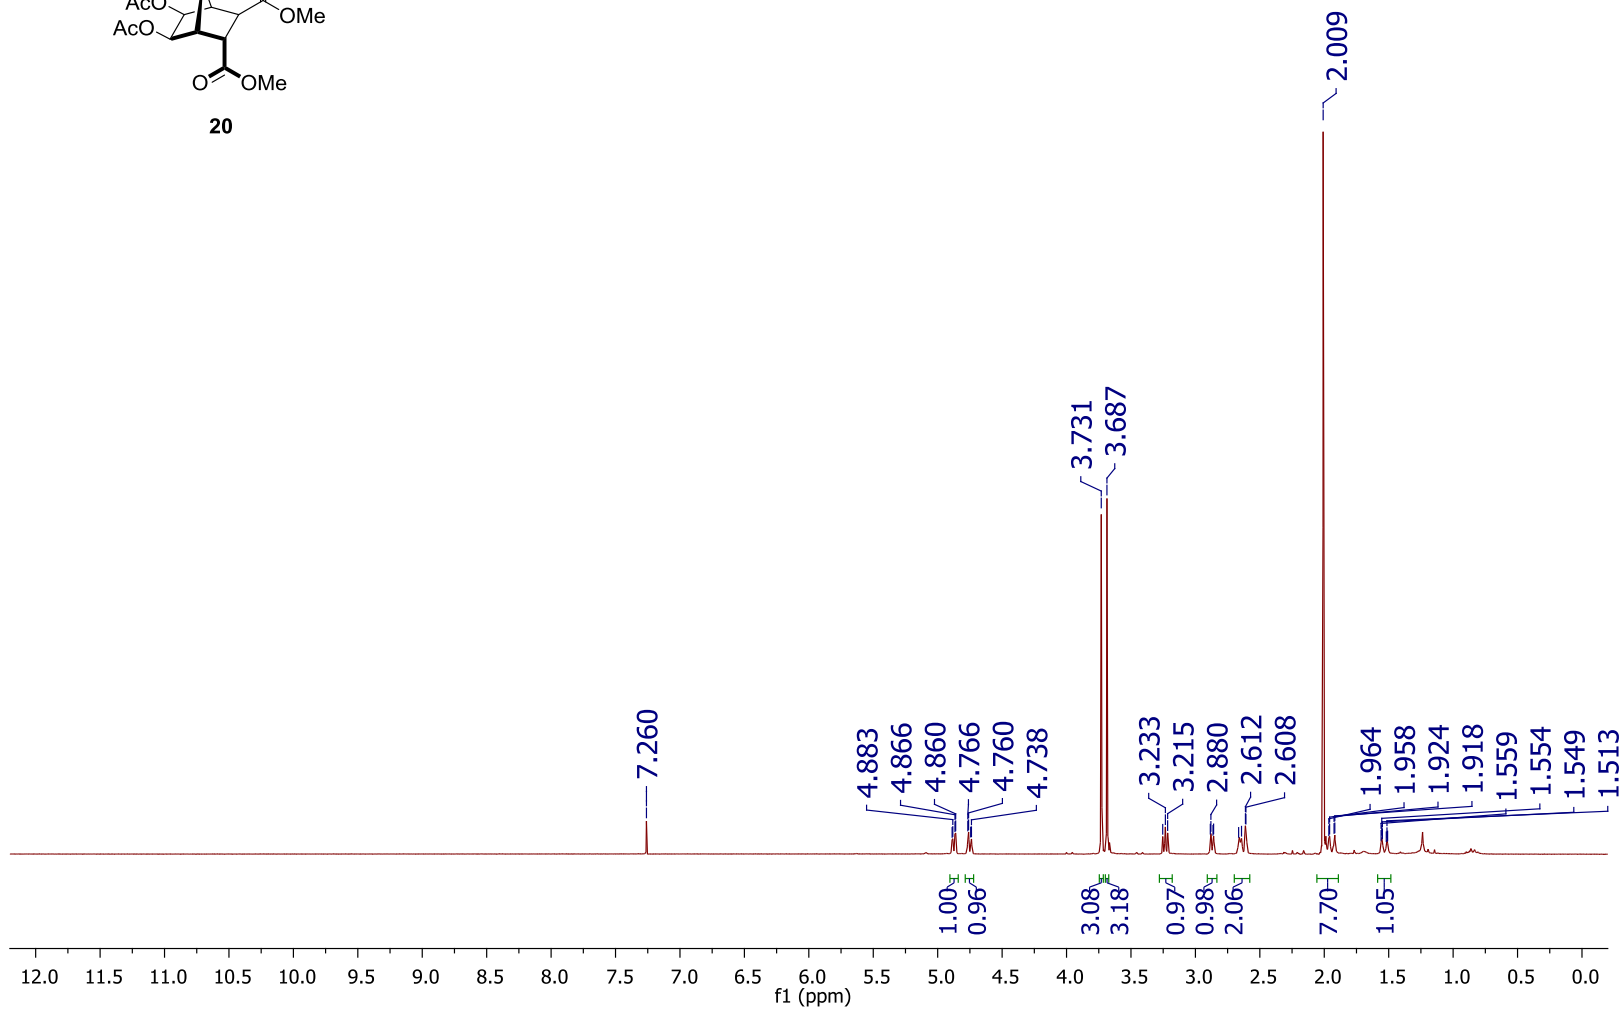

Shane/SMH04-159B-CARBON  
Single Pulse with Broadband Decoupling

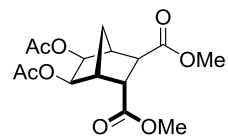

**20**

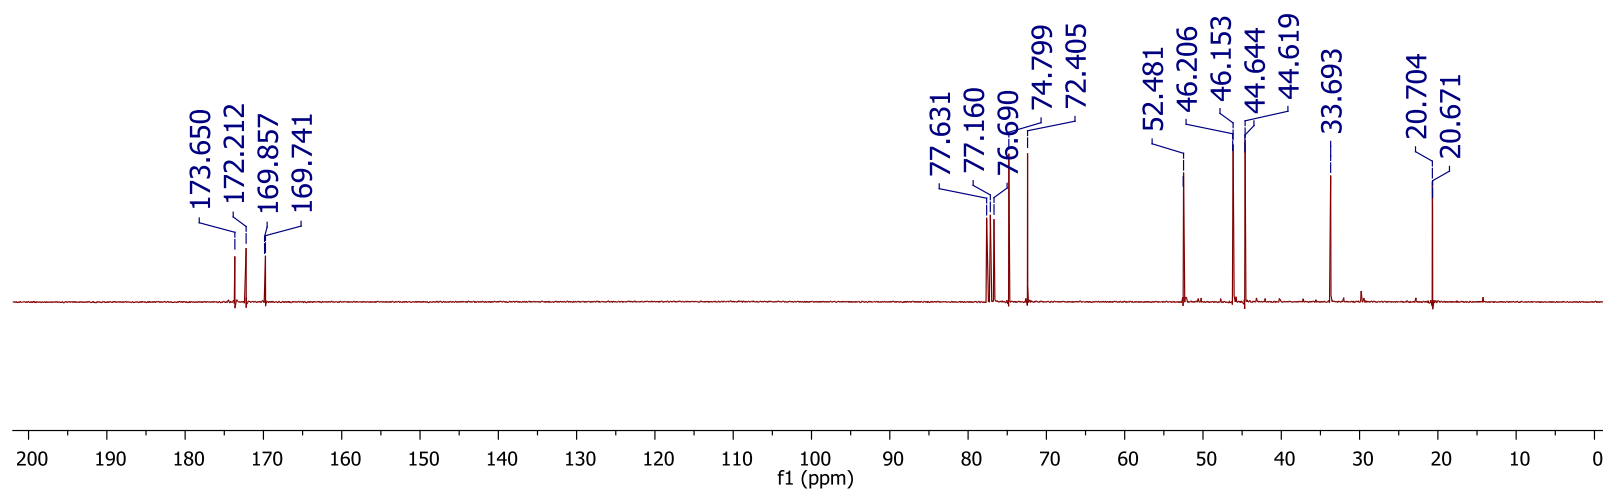

Shane/SMH05-093D  
Single Pulse Experiment

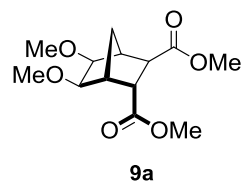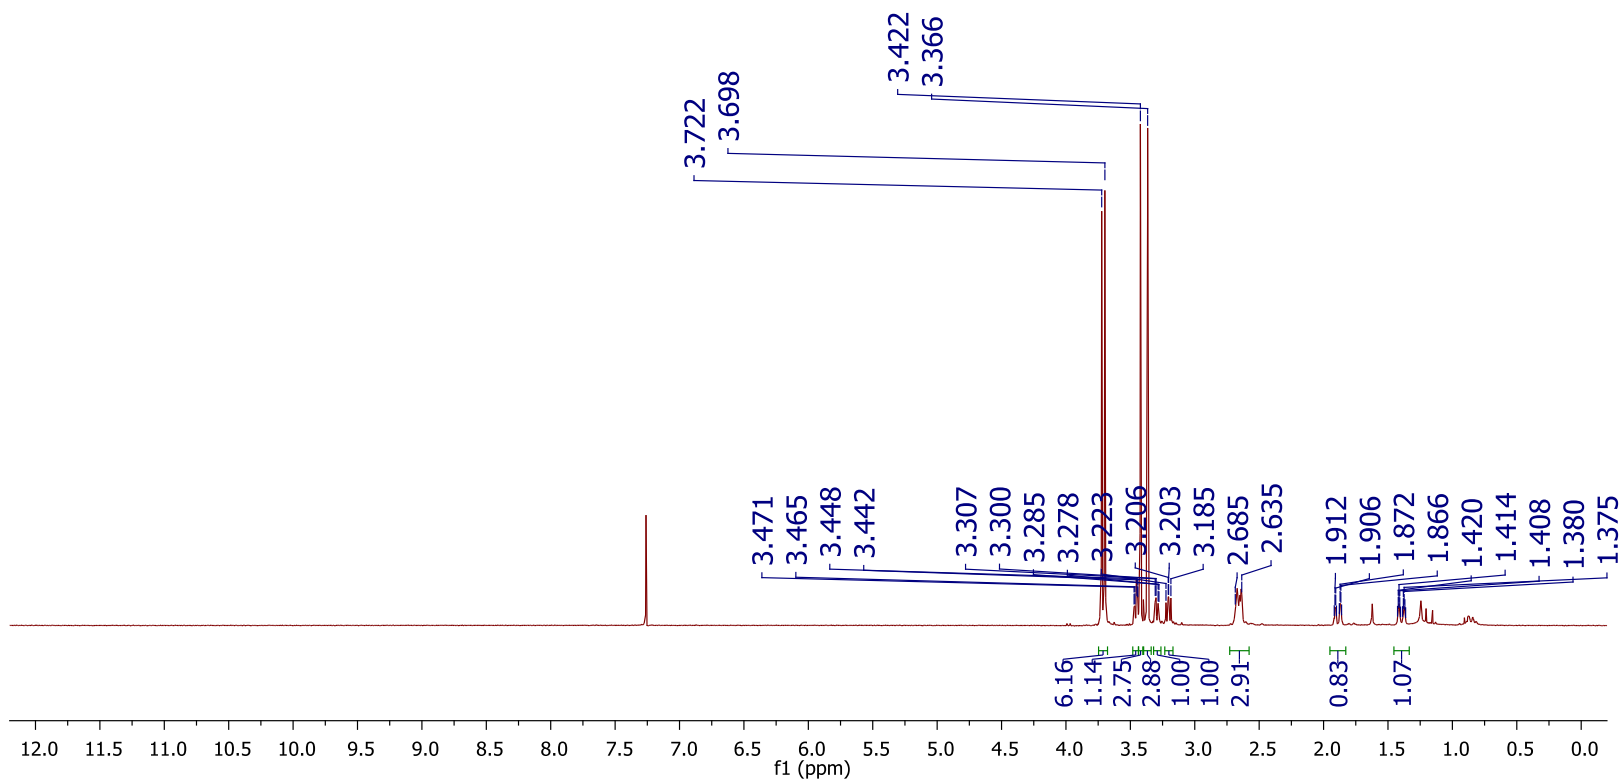

Shane/SMH05-093D-CARBON  
Single Pulse with Broadband Decoupling

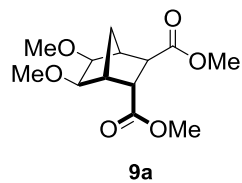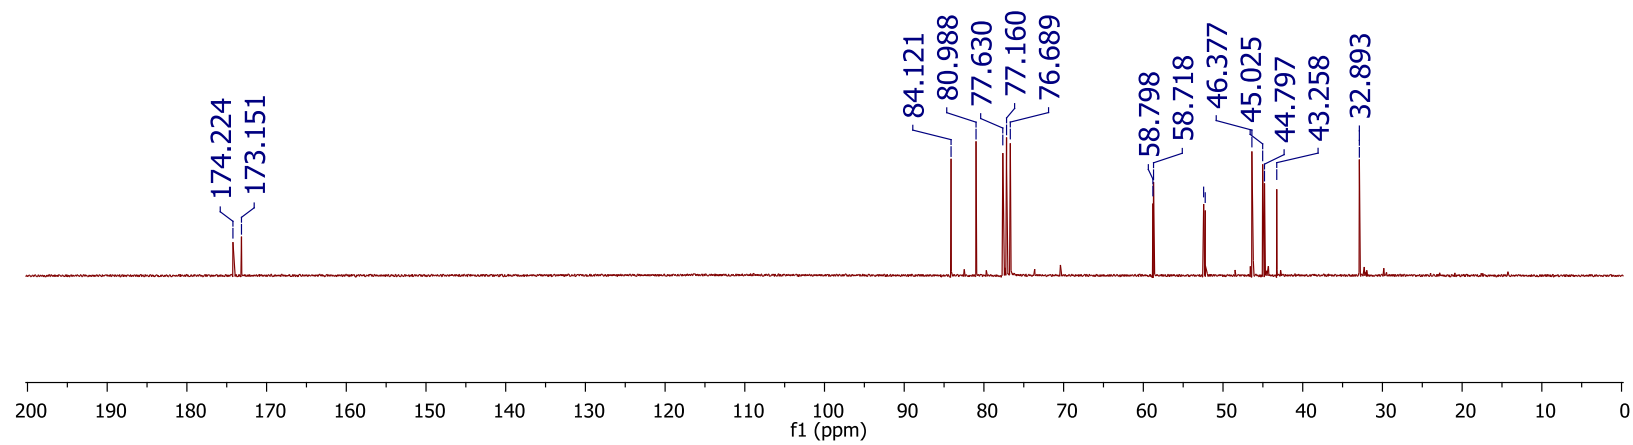

Norbornane diester dibenzyl ether  
SMH05-081F-1H

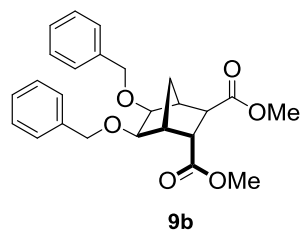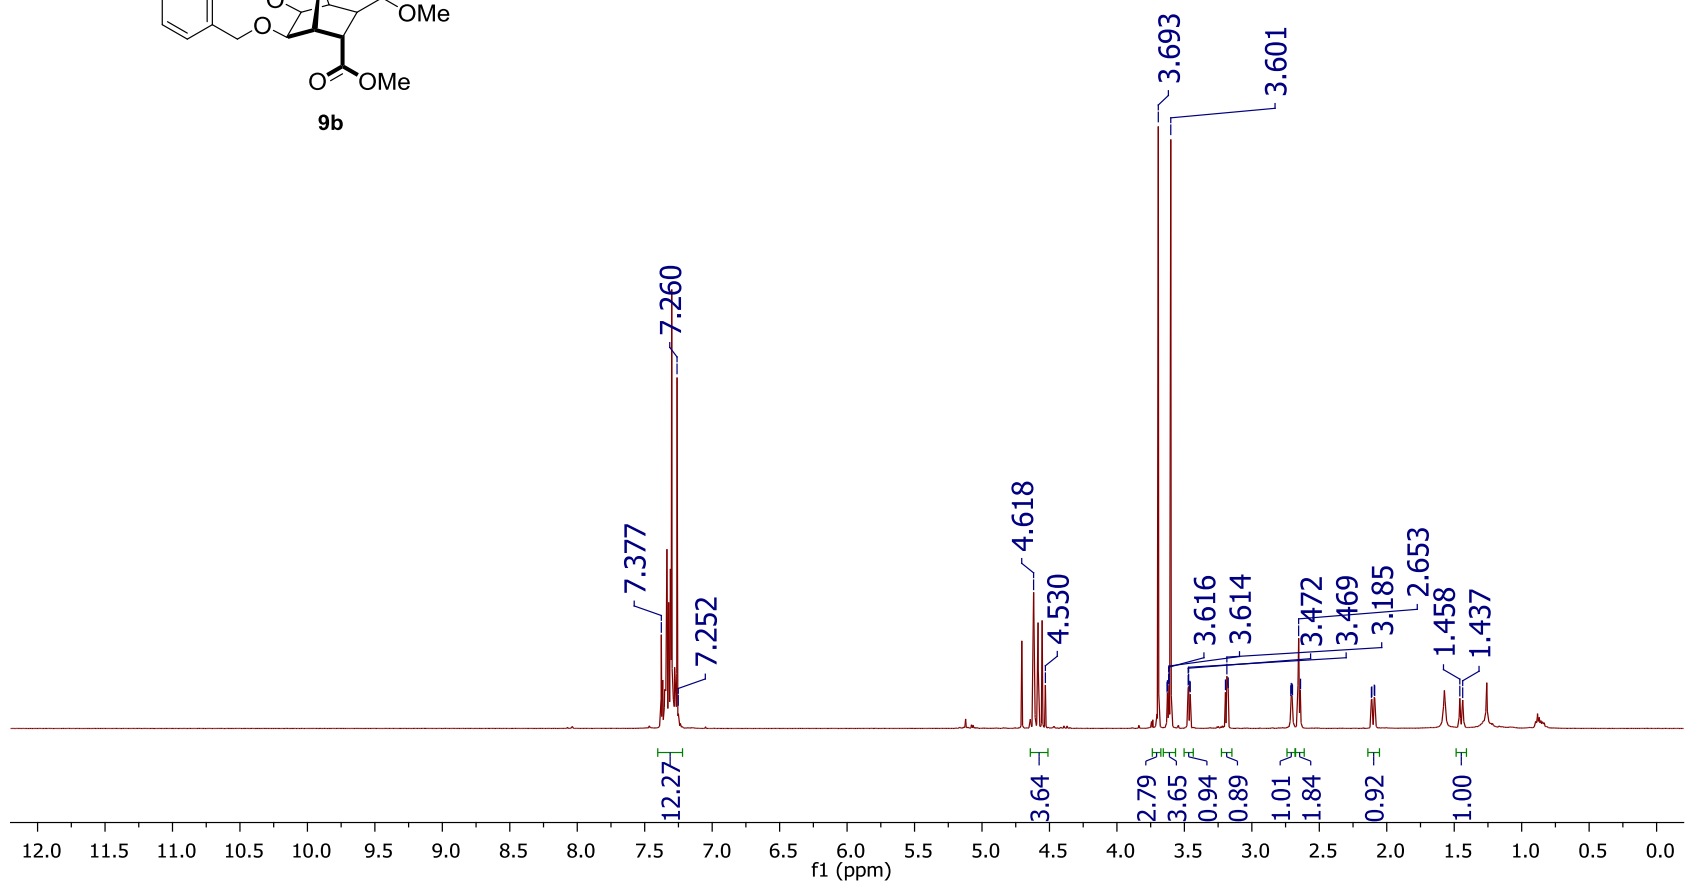

Norbornane diester dibenzyl ether  
 SMH05-081F-13C  
 C13CPD CDCl3 {C:\Data\_500\Gail} nmr 13

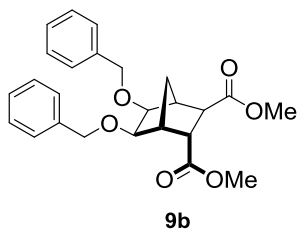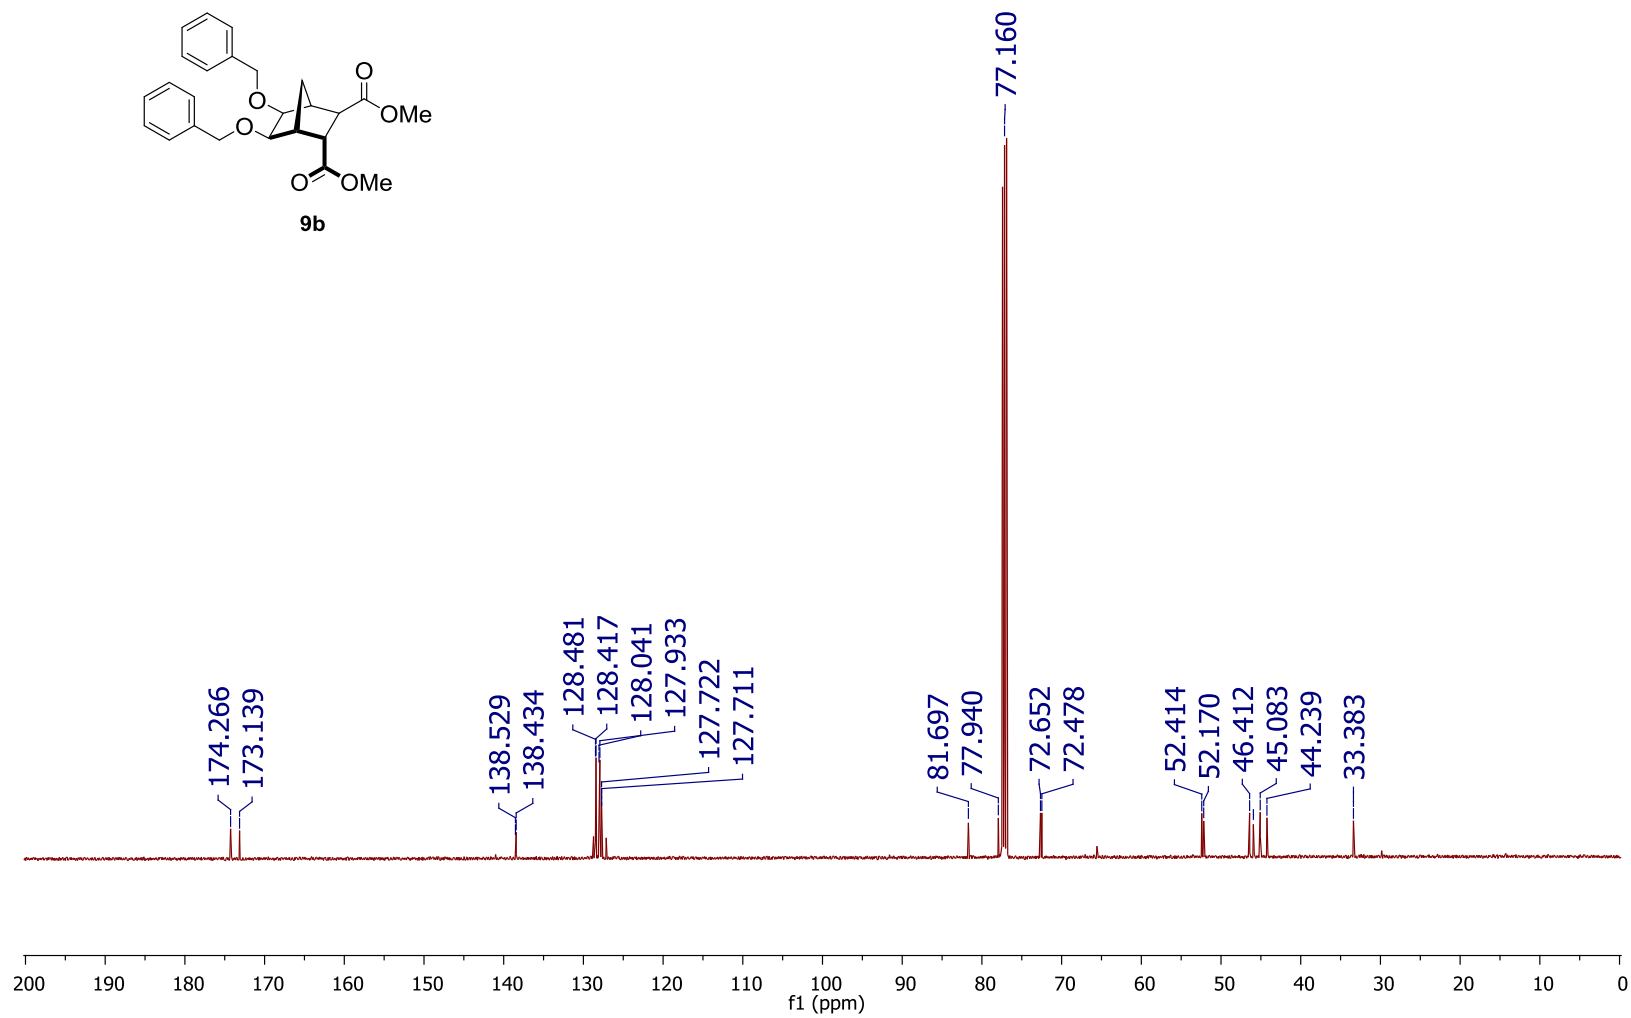



SMH07-113B  
 SMH07-113B - 1H  
 PROTON CDCl3 {C:\Data\_500\Shane} nmr 2

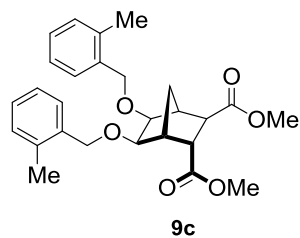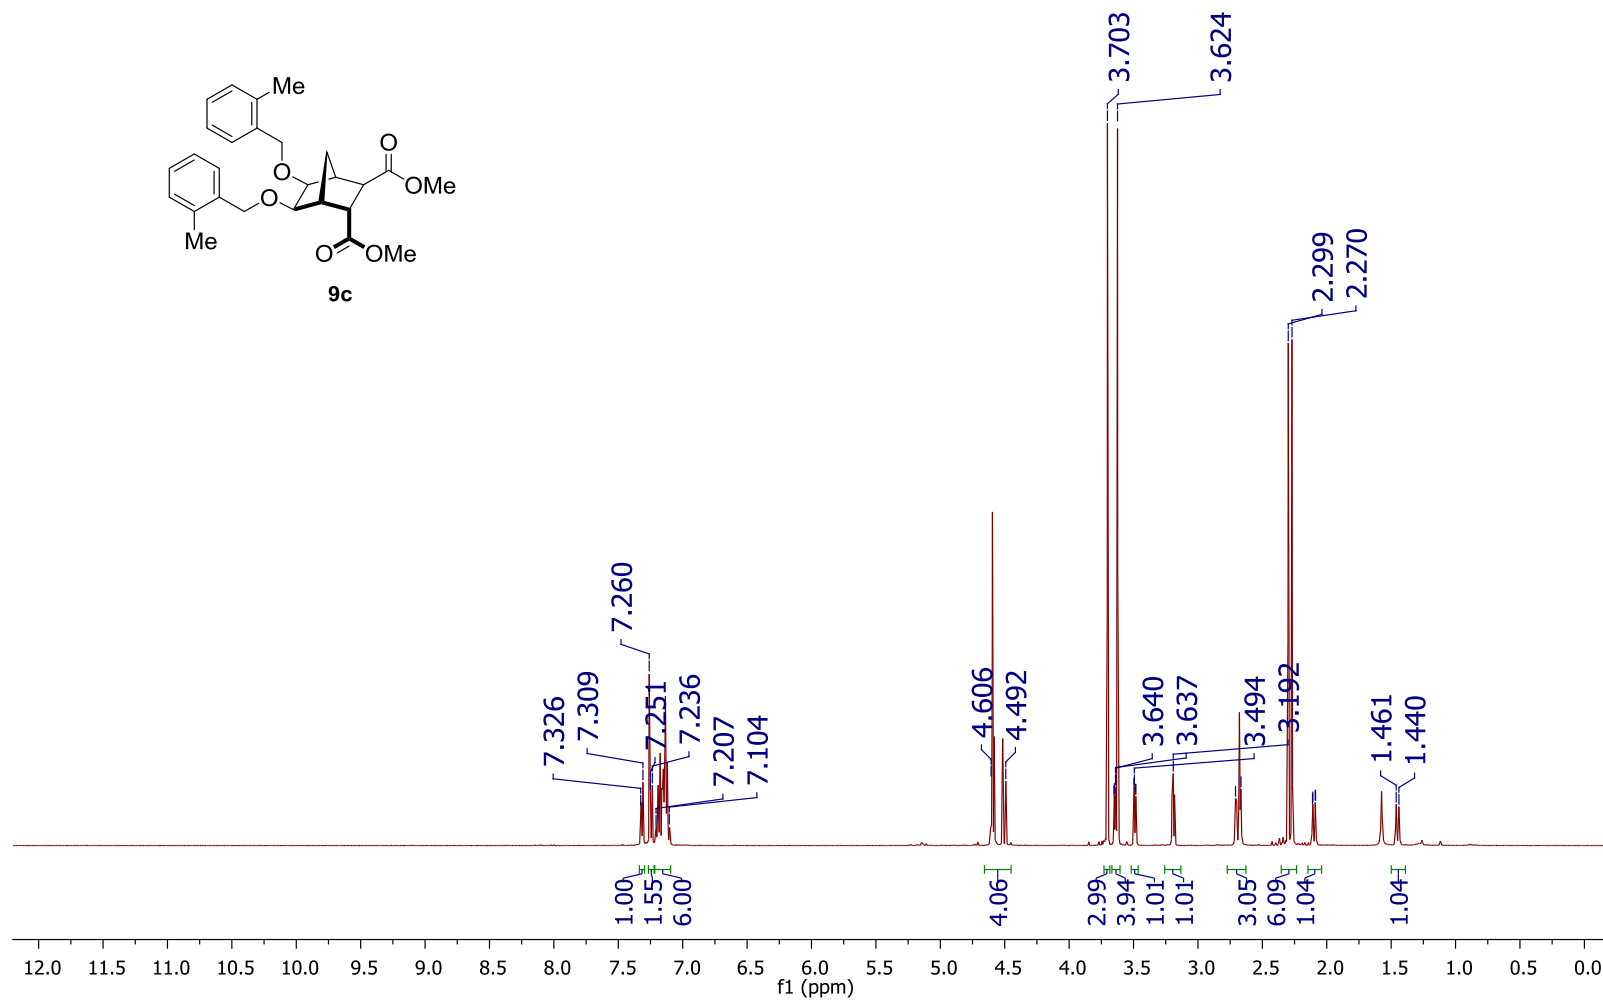

SMH07-113B  
SMH07-113B - <sup>13</sup>C  
C13CPD CDCl<sub>3</sub> {C:\Data\_500\Shane} nmr 2

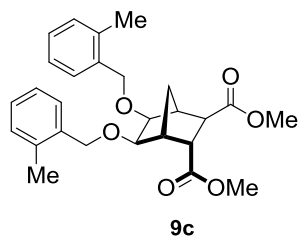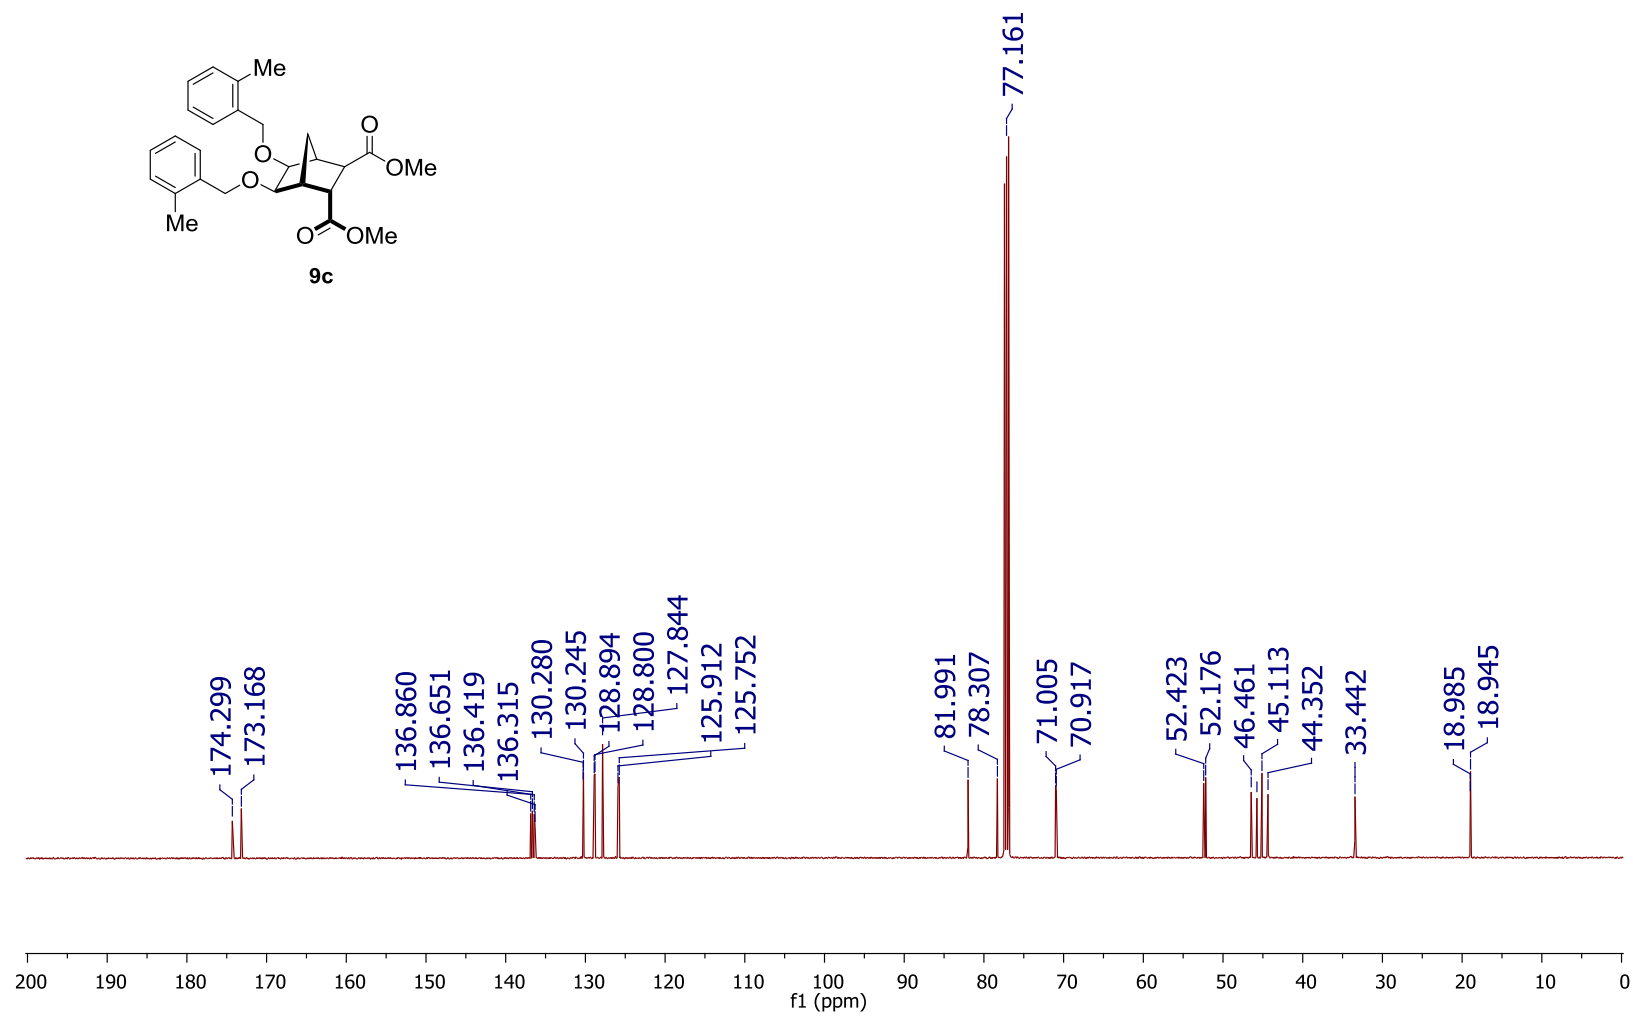

SMH08-025B  
 SMH08-025B - 1H  
 PROTON CDCl3 {C:\Data\_500\Shane} nmr 14

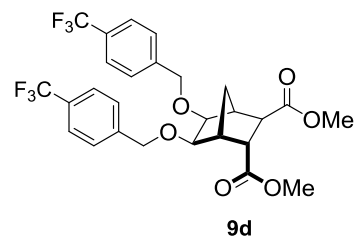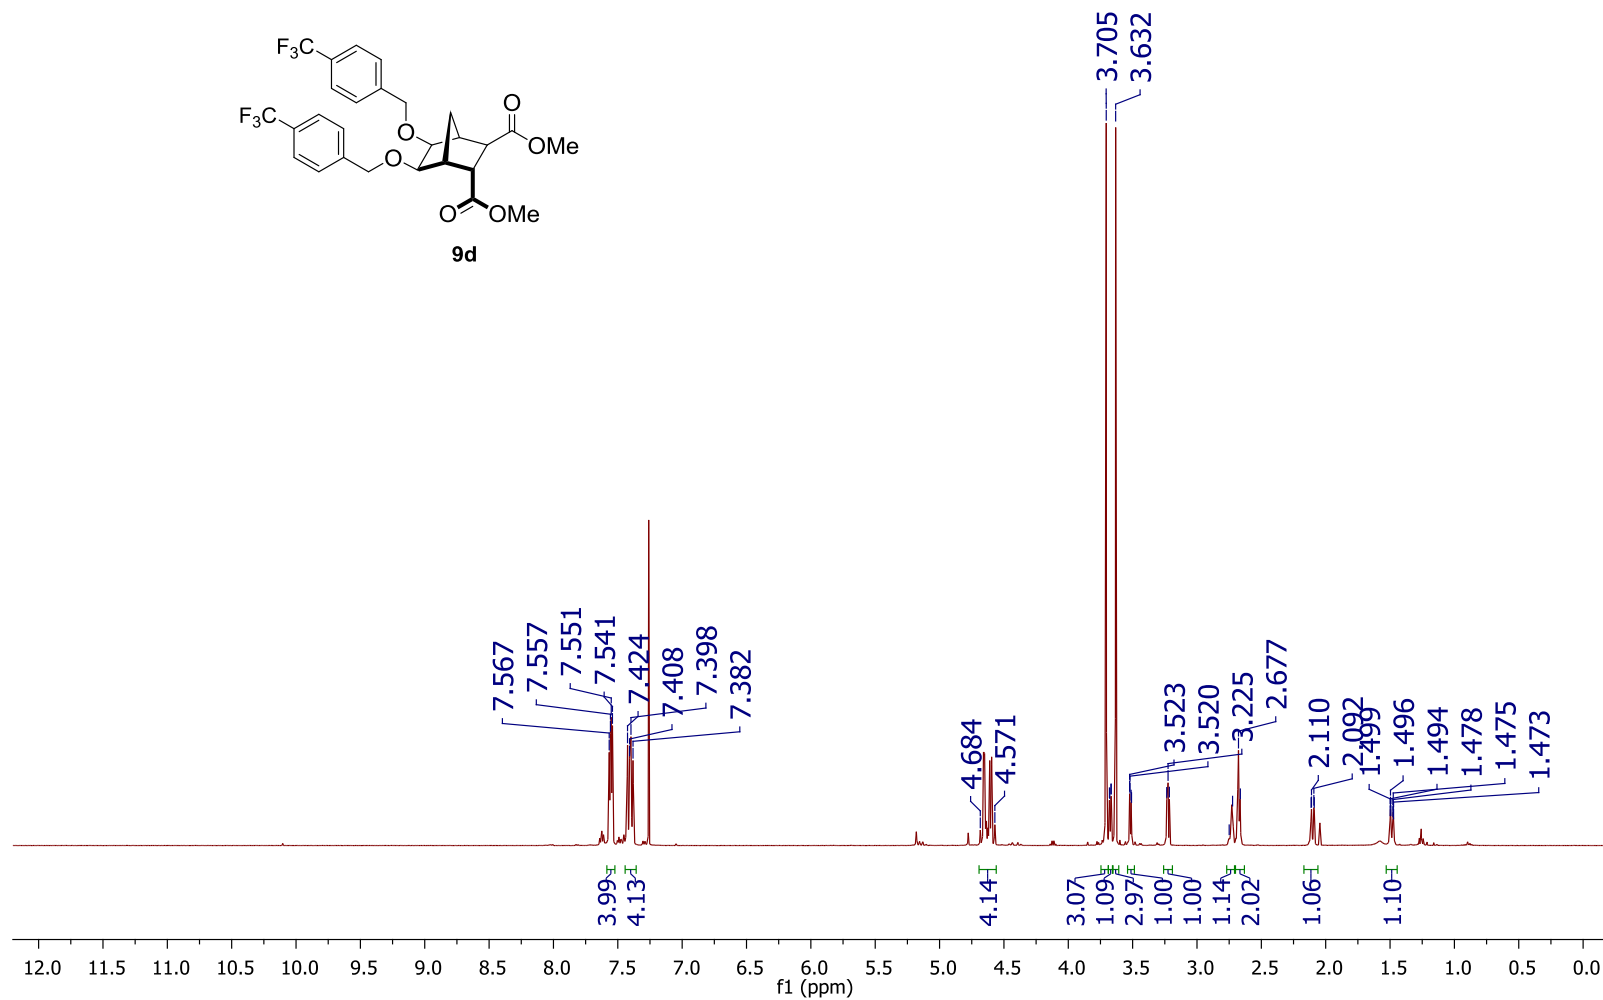

SMH08-025B  
SMH08-025B - 13C  
C13CPD CDCl3 {C:\Data\_500\Shane} nmr 14

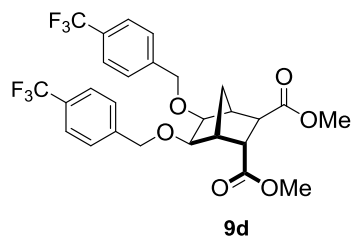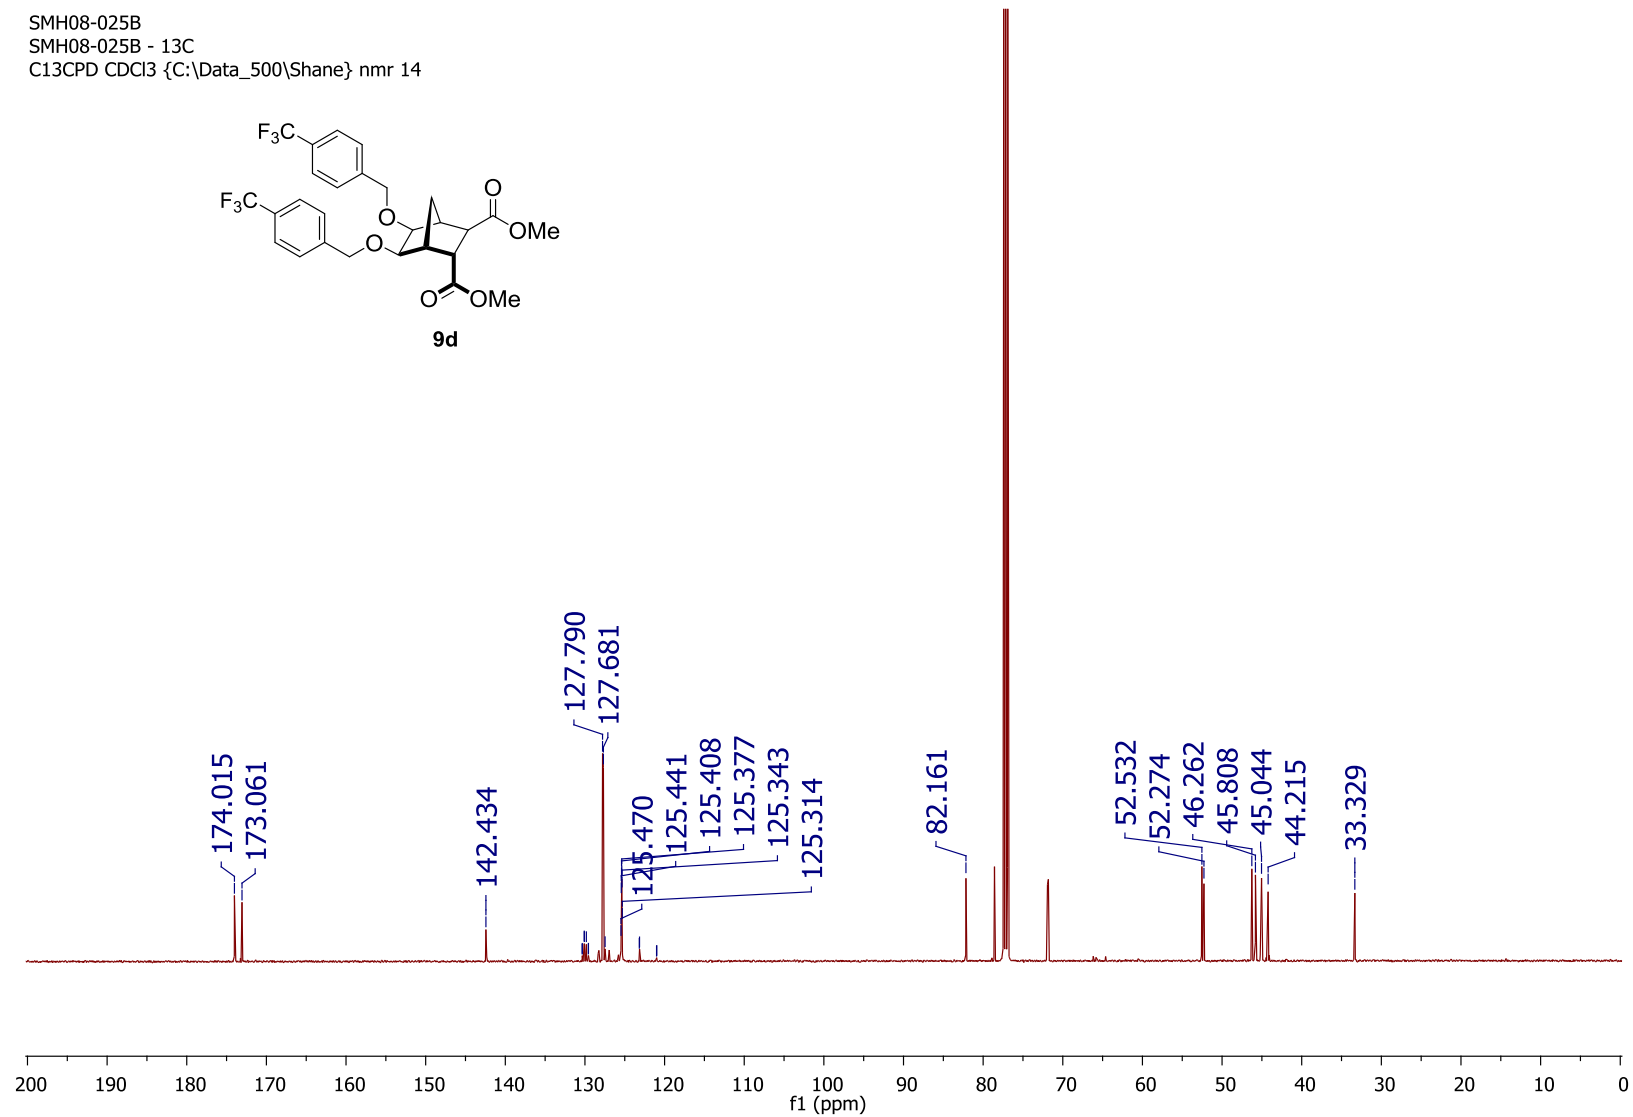

SMH08-025B  
SMH08-025B-19F

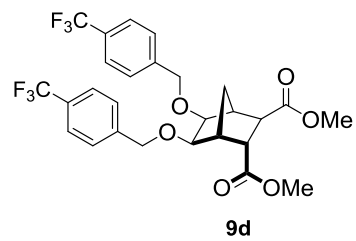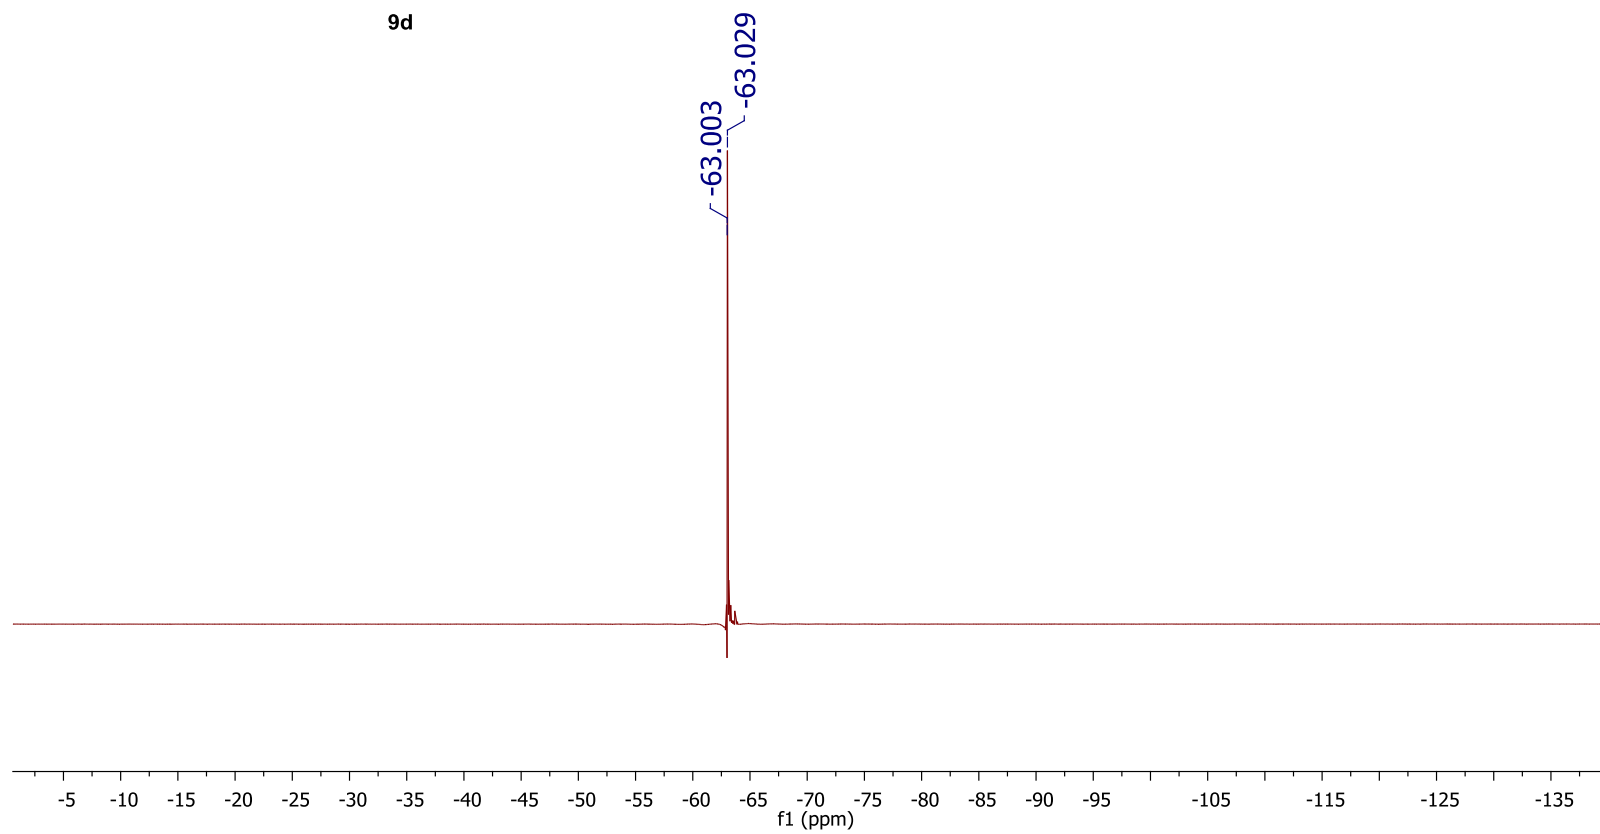

SMH08-041B  
 SMH08-041B - 1H  
 PROTON CDCl3 {C:\Data\_500\Shane} nmr 6

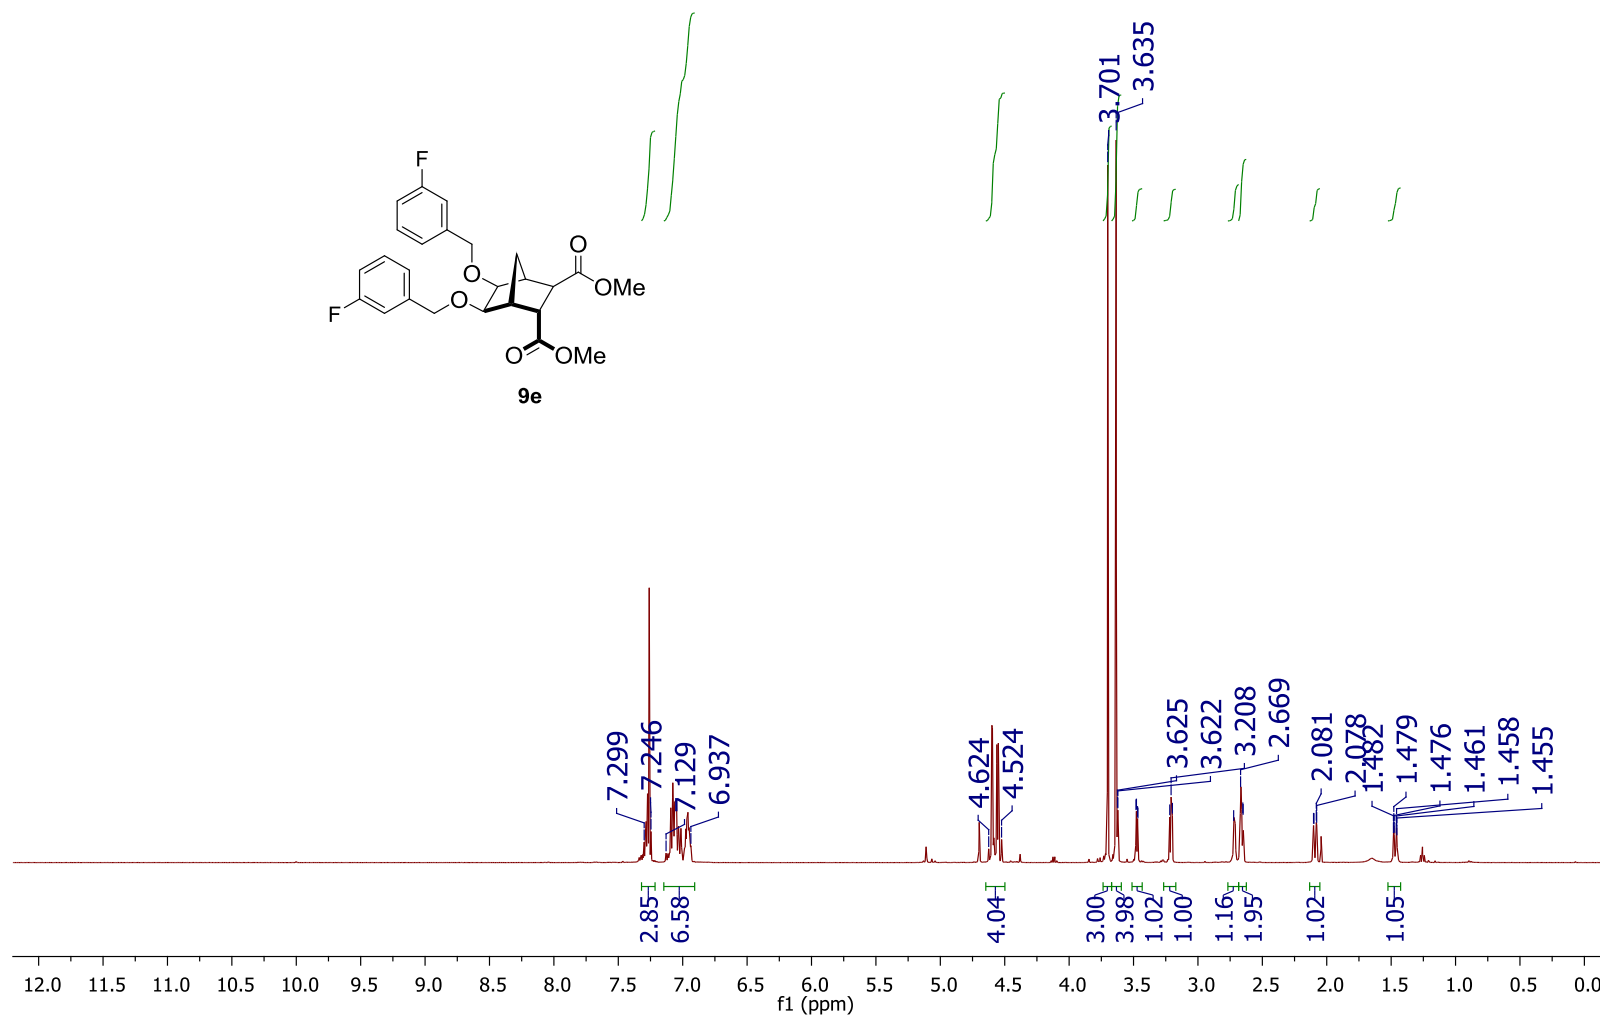

SMH08-041B  
SMH08-041B - 13C  
C13CPD CDCl3 {C:\Data\_500\Shane} nmr 6

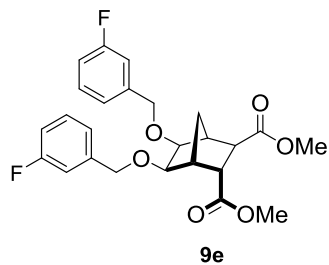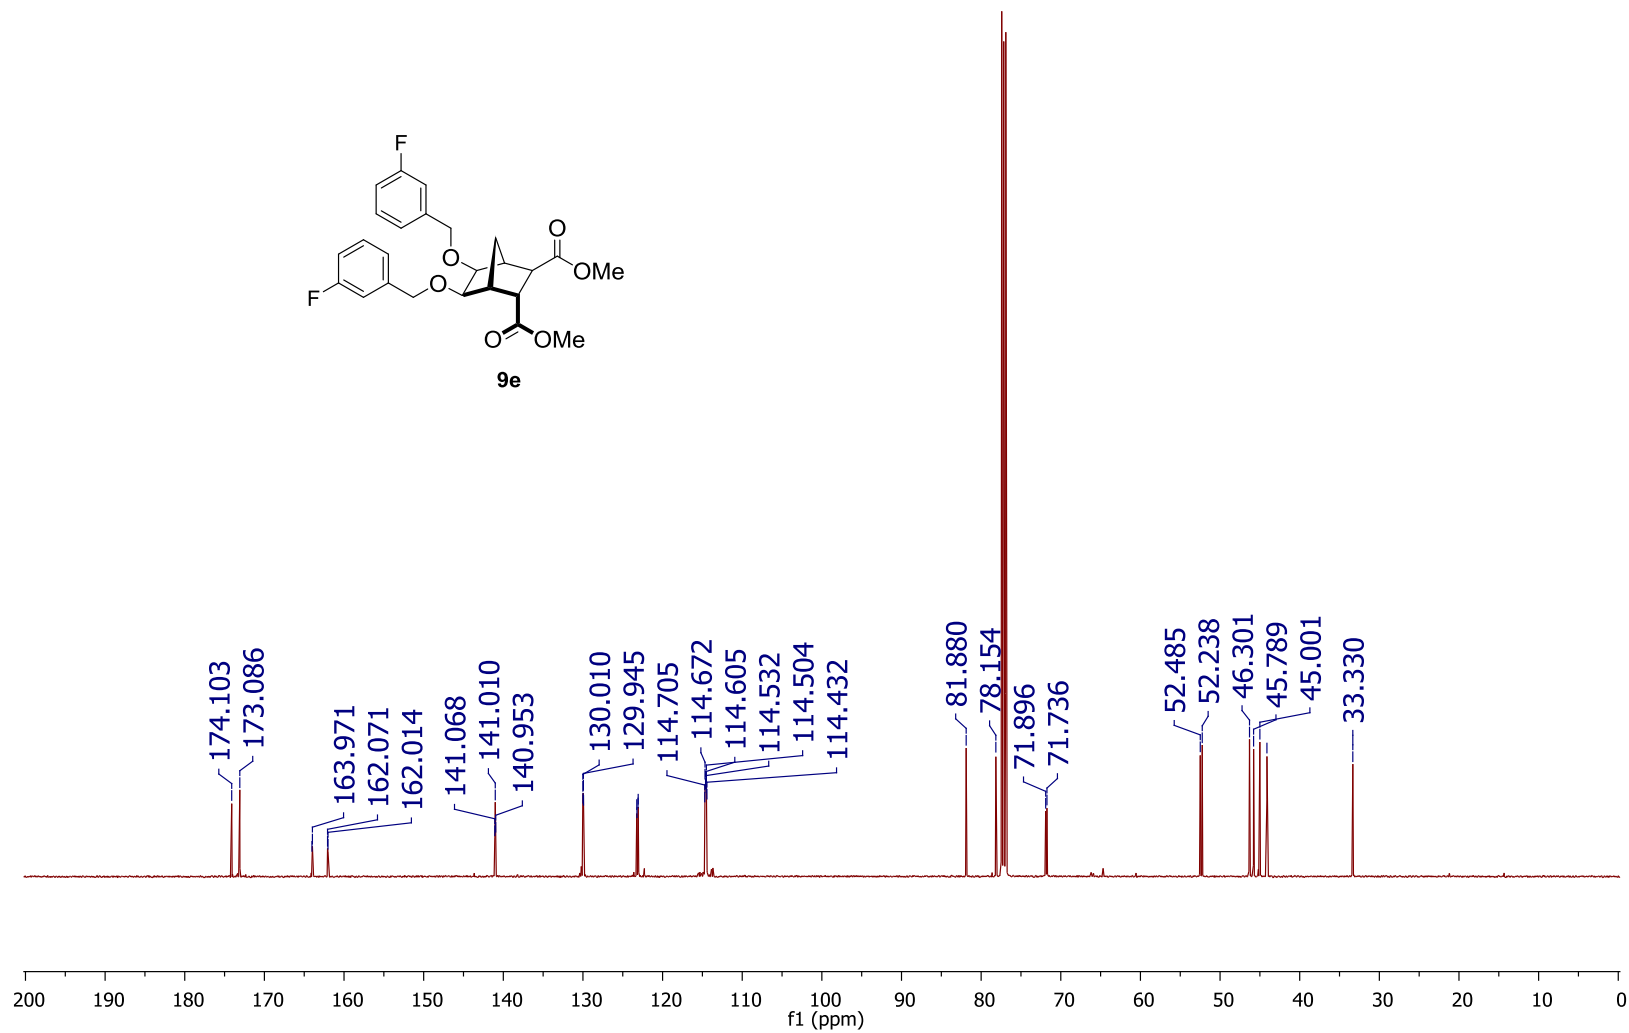

SMH08-041B  
SMH08-041B-19F

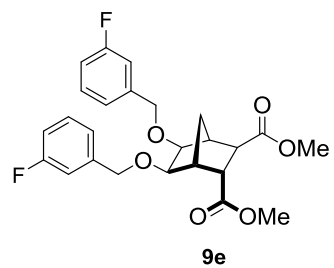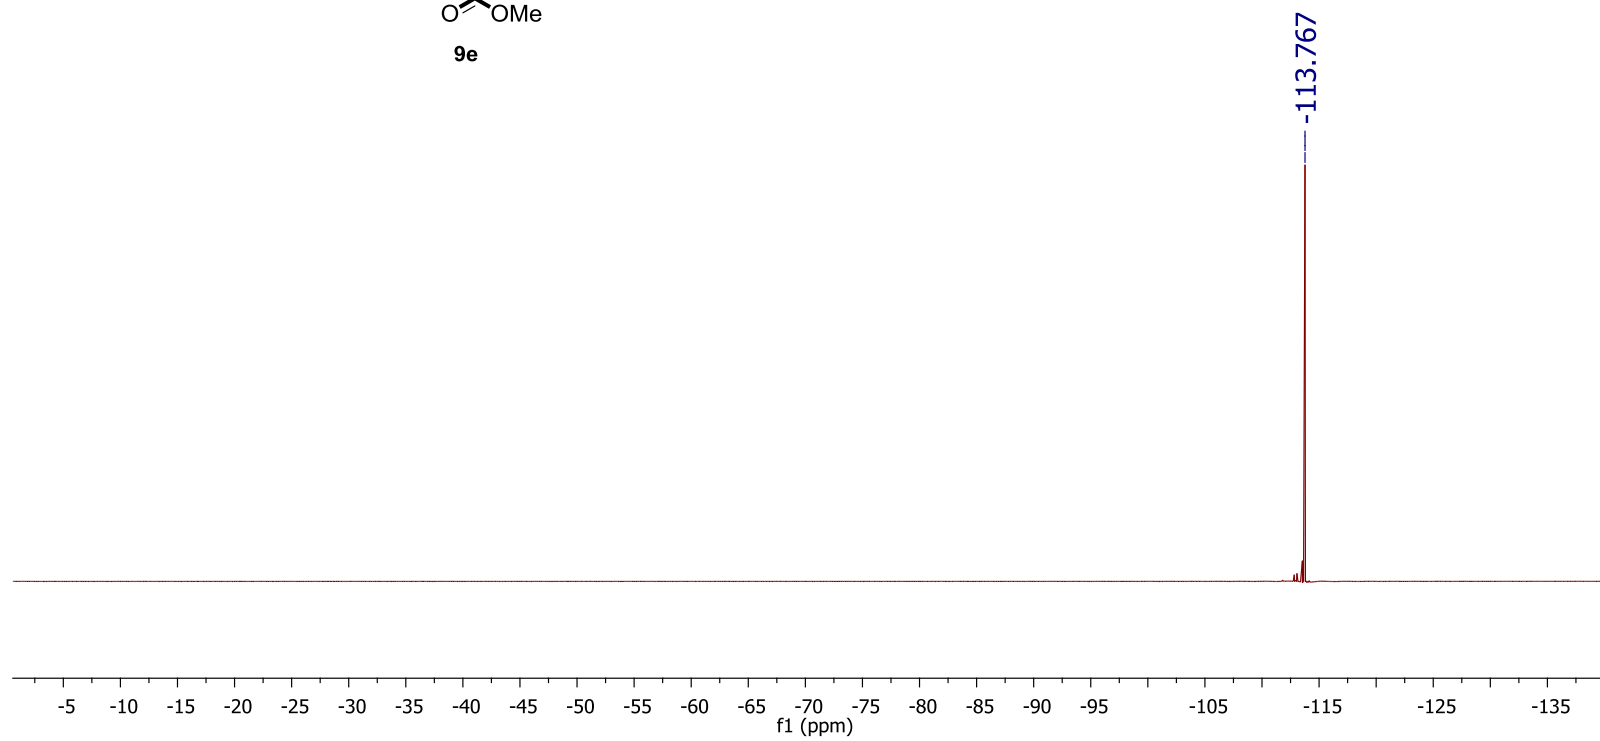



SMH06-145B  
 SMH06-145B - 1H  
 PROTON CDCl3 {C:\Data\_500\Shane} nmr 1

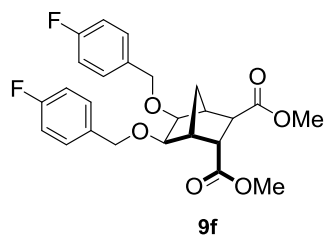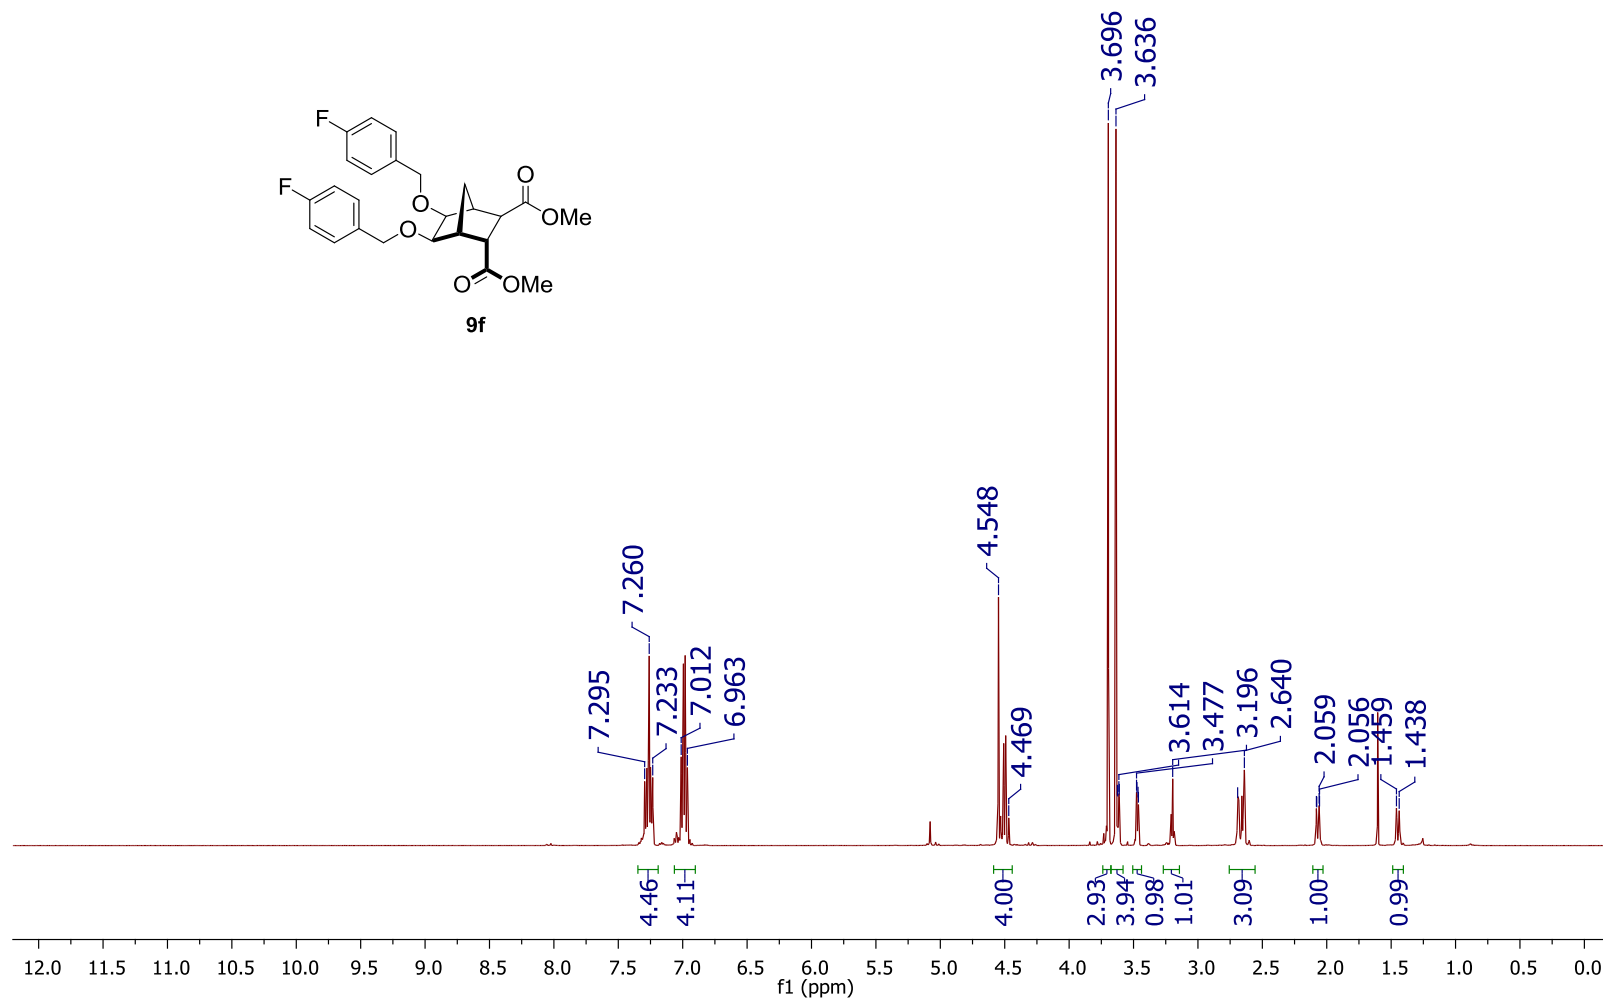

SMH06-145B  
SMH06-145B - <sup>13</sup>C  
C13CPD CDCl<sub>3</sub> {C:\Data\_500\Shane} nmr 1

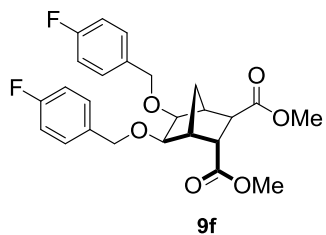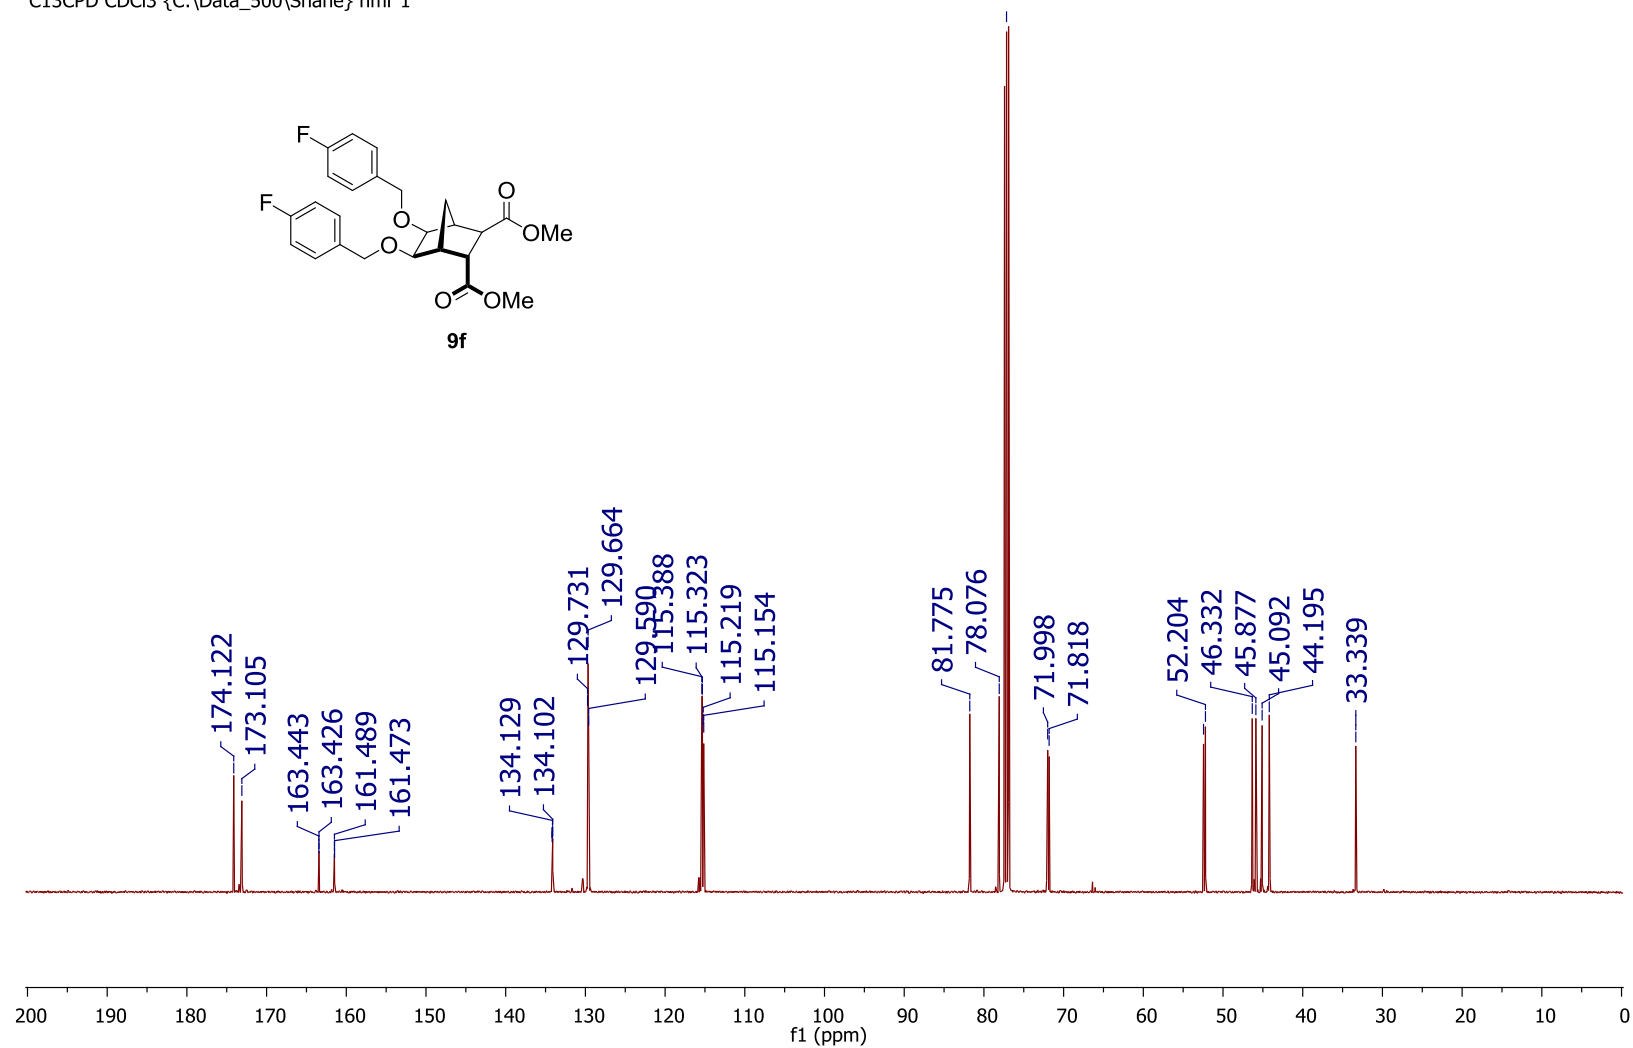

SMH08-099C  
SMH08-099C-19F

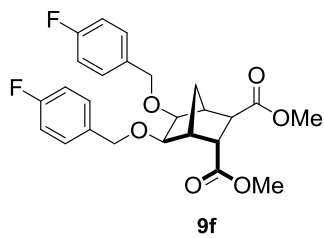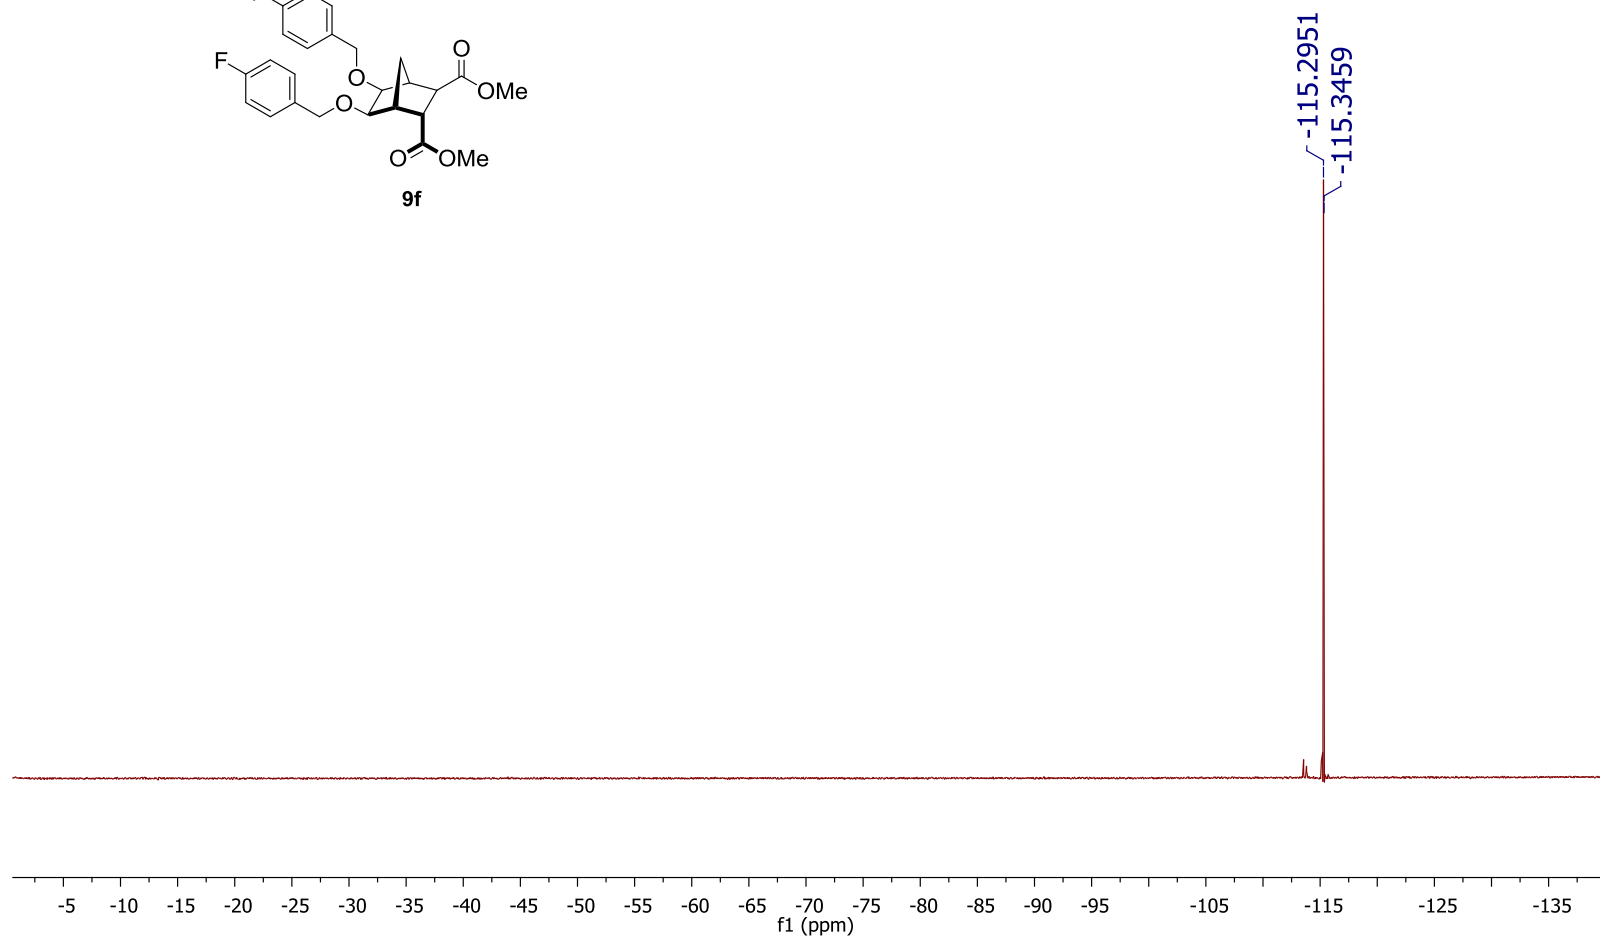

SMH06-123B  
 SMH06-123B - 1H  
 PROTON CDCl3 {C:\Data\_500\Shane} nmr 1

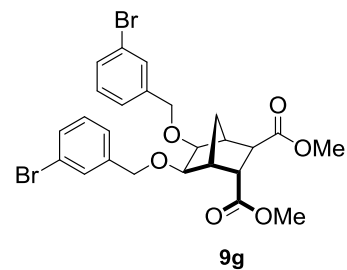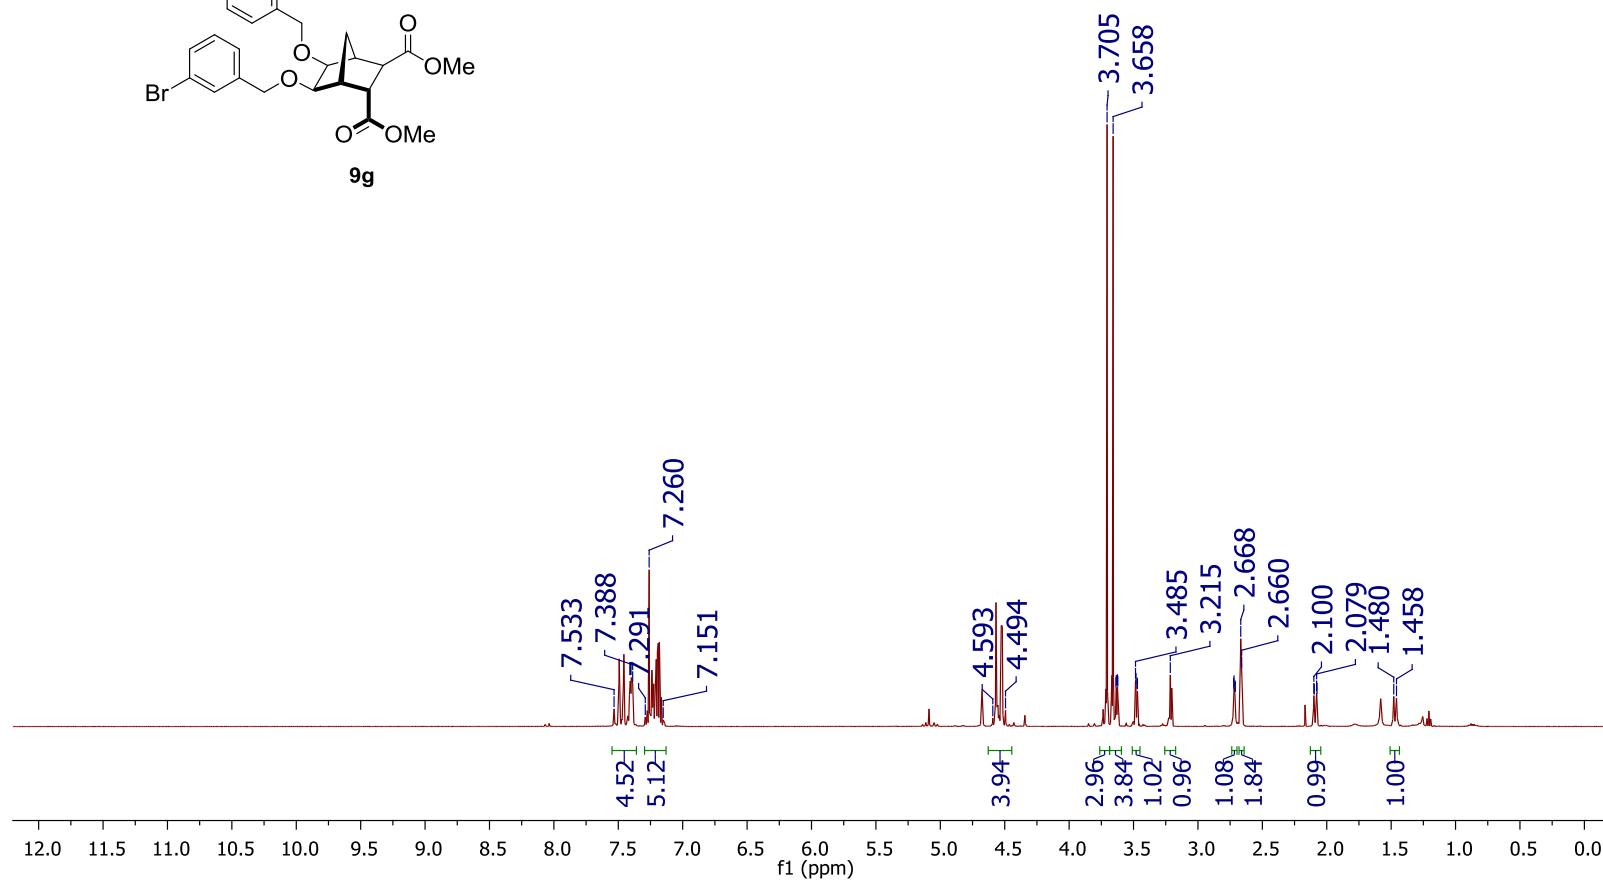

Norbornane diester di benzyl-3-bromo  
 SMH06-123B - 13C  
 C13CPD CDCl3 {C:\Data\_500\Shane} nmr 1

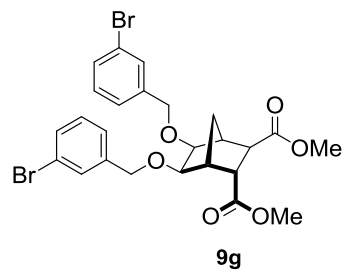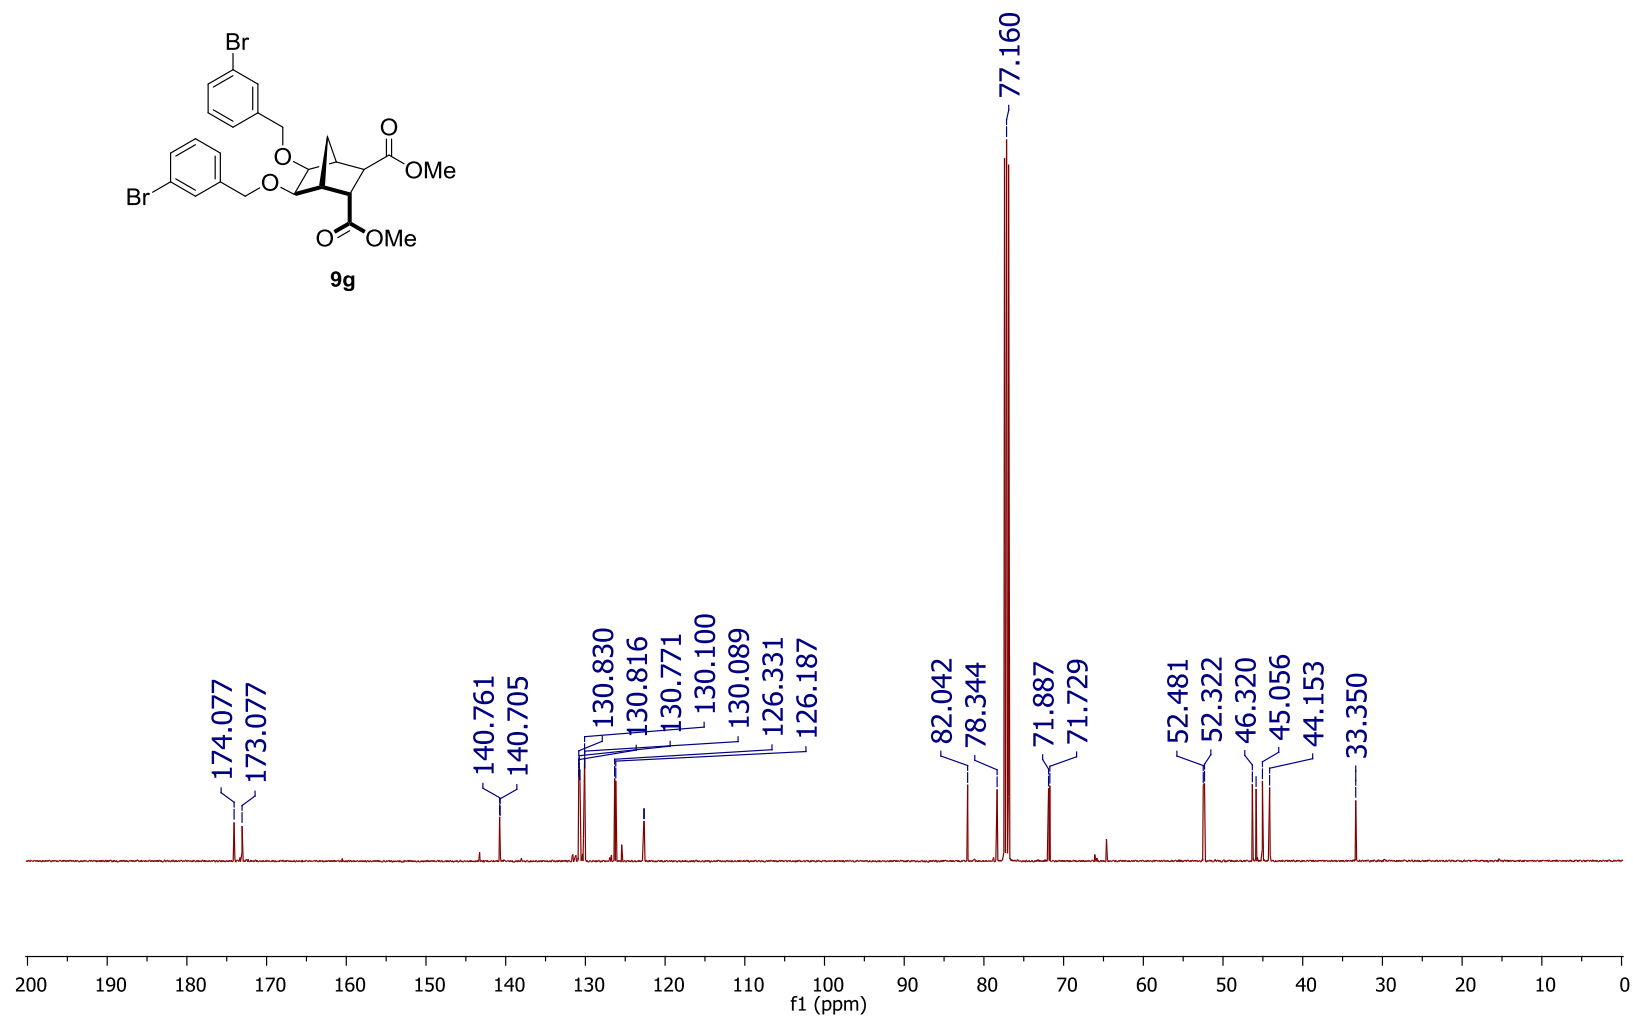

SMH06-115C  
 SMH06-115C - 1H  
 PROTON CDCl3 {C:\Data\_500\Shane} nmr 3

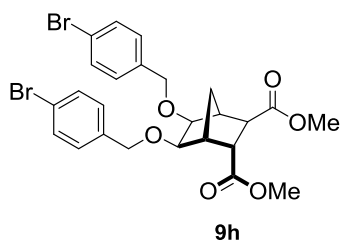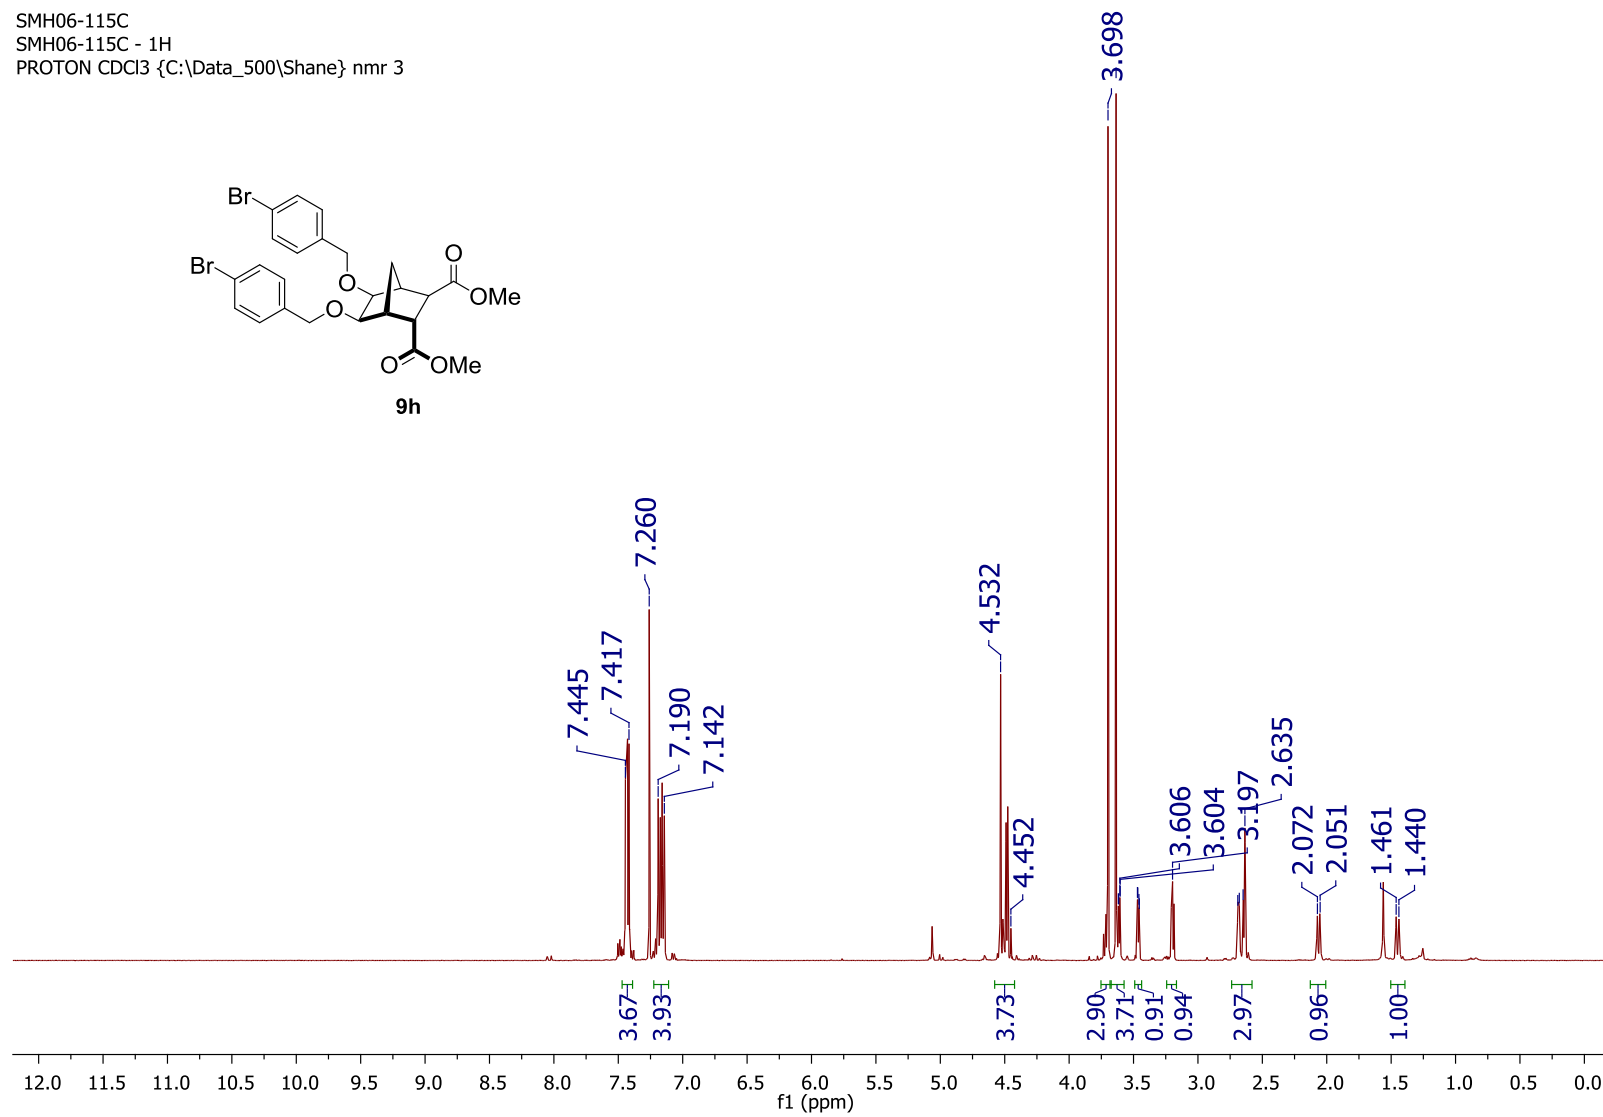

SMH06-115C  
SMH06-115C - <sup>13</sup>C  
C13CPD CDCl<sub>3</sub> {C:\Data\_500\Shane} nmr 3

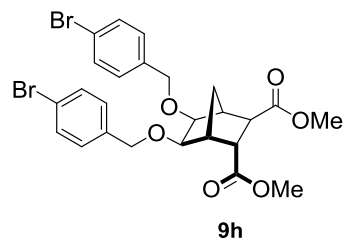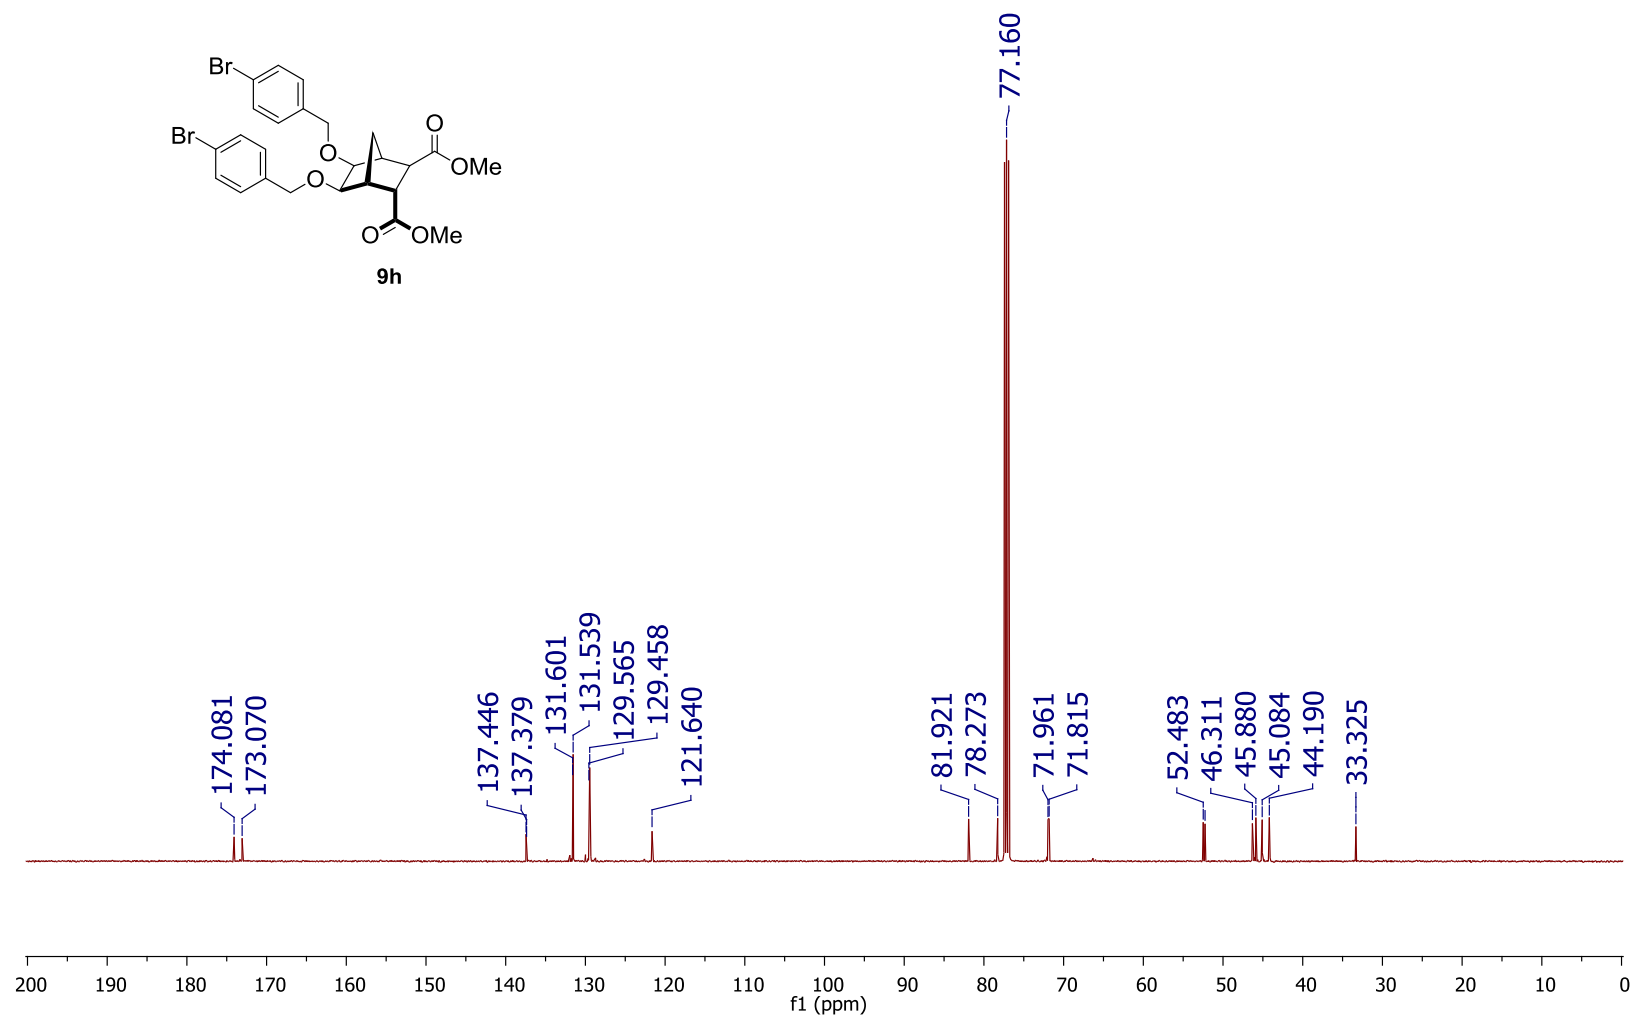

Shane/SMH07-147B  
Single Pulse Experiment

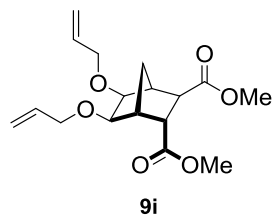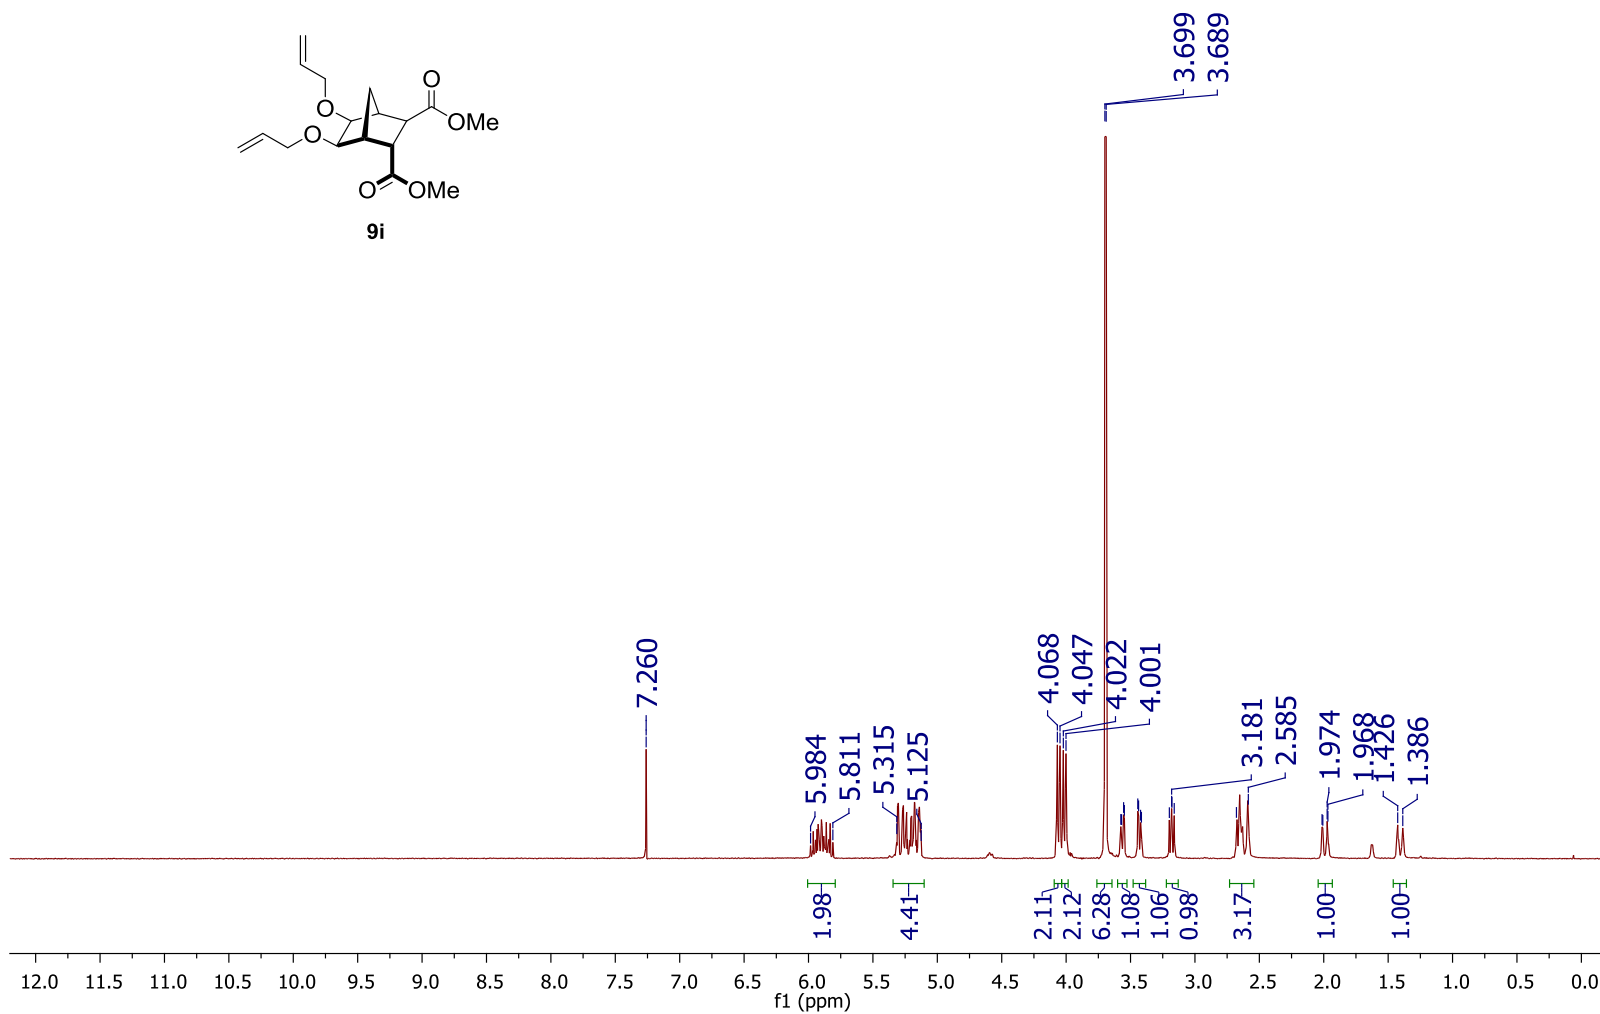



Shane/SMH07-147B-CARBON  
Single Pulse with Broadband Decoupling

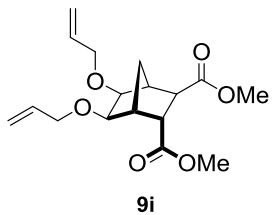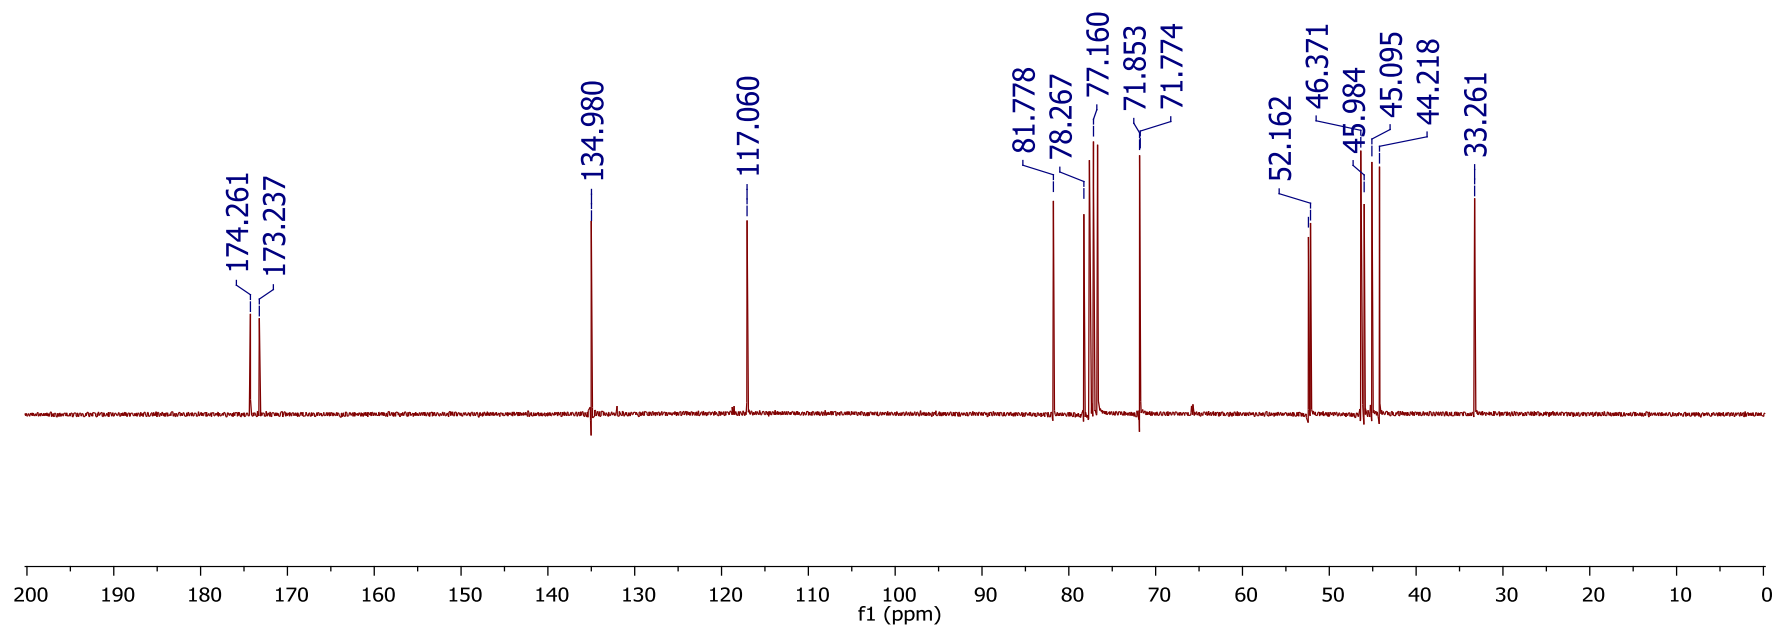

Shane/SMH05-129B2  
Single Pulse Experiment

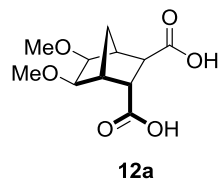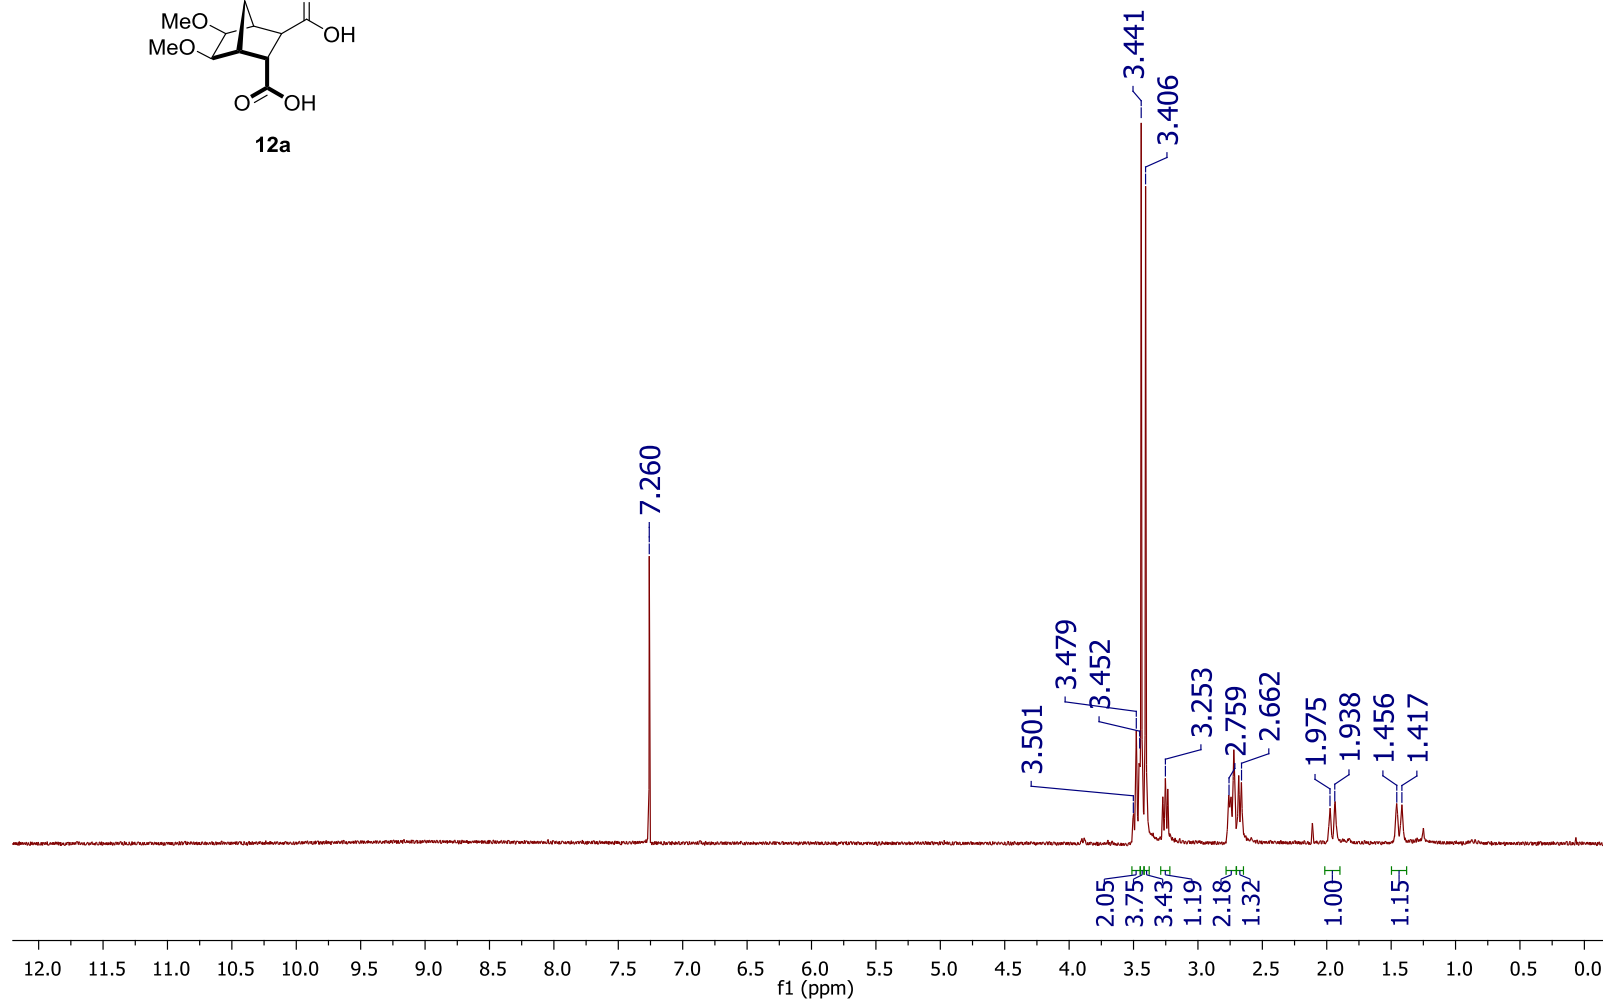

Shane/SMH05-129B-CARBON  
Single Pulse with Broadband Decoupling

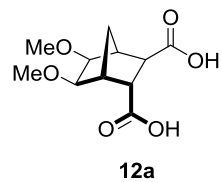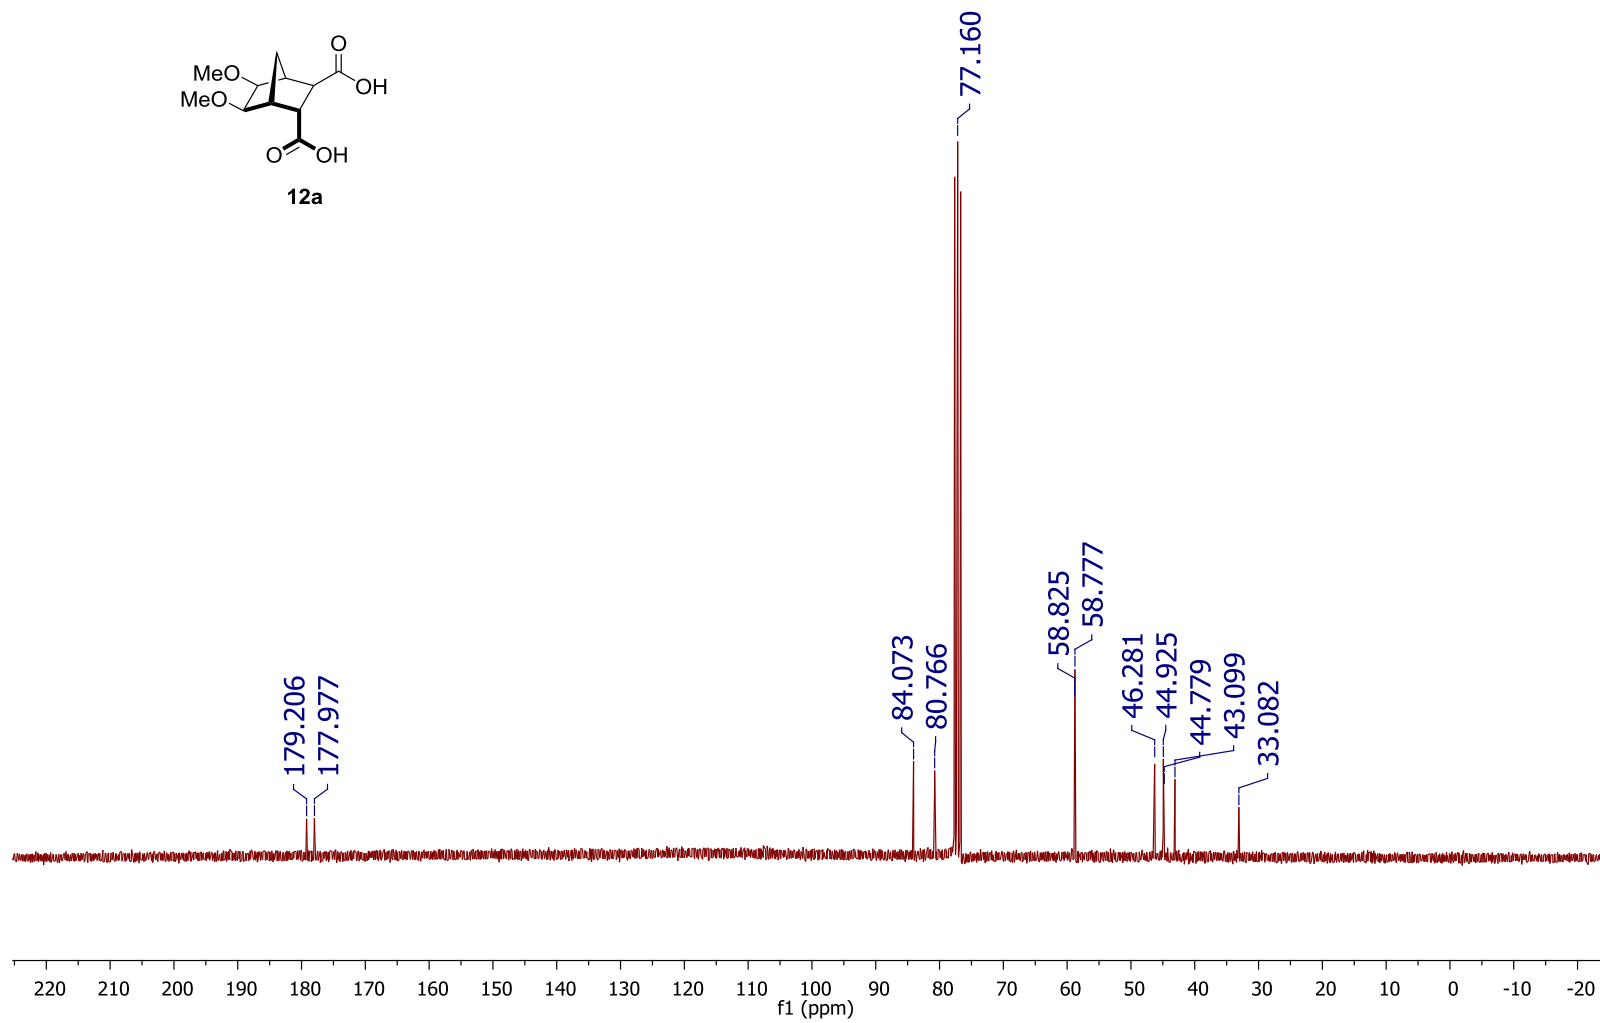

Shane/SMH05-121B  
Single Pulse Experiment

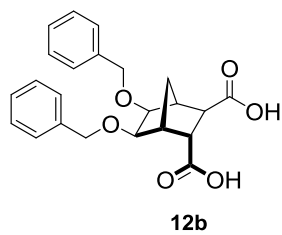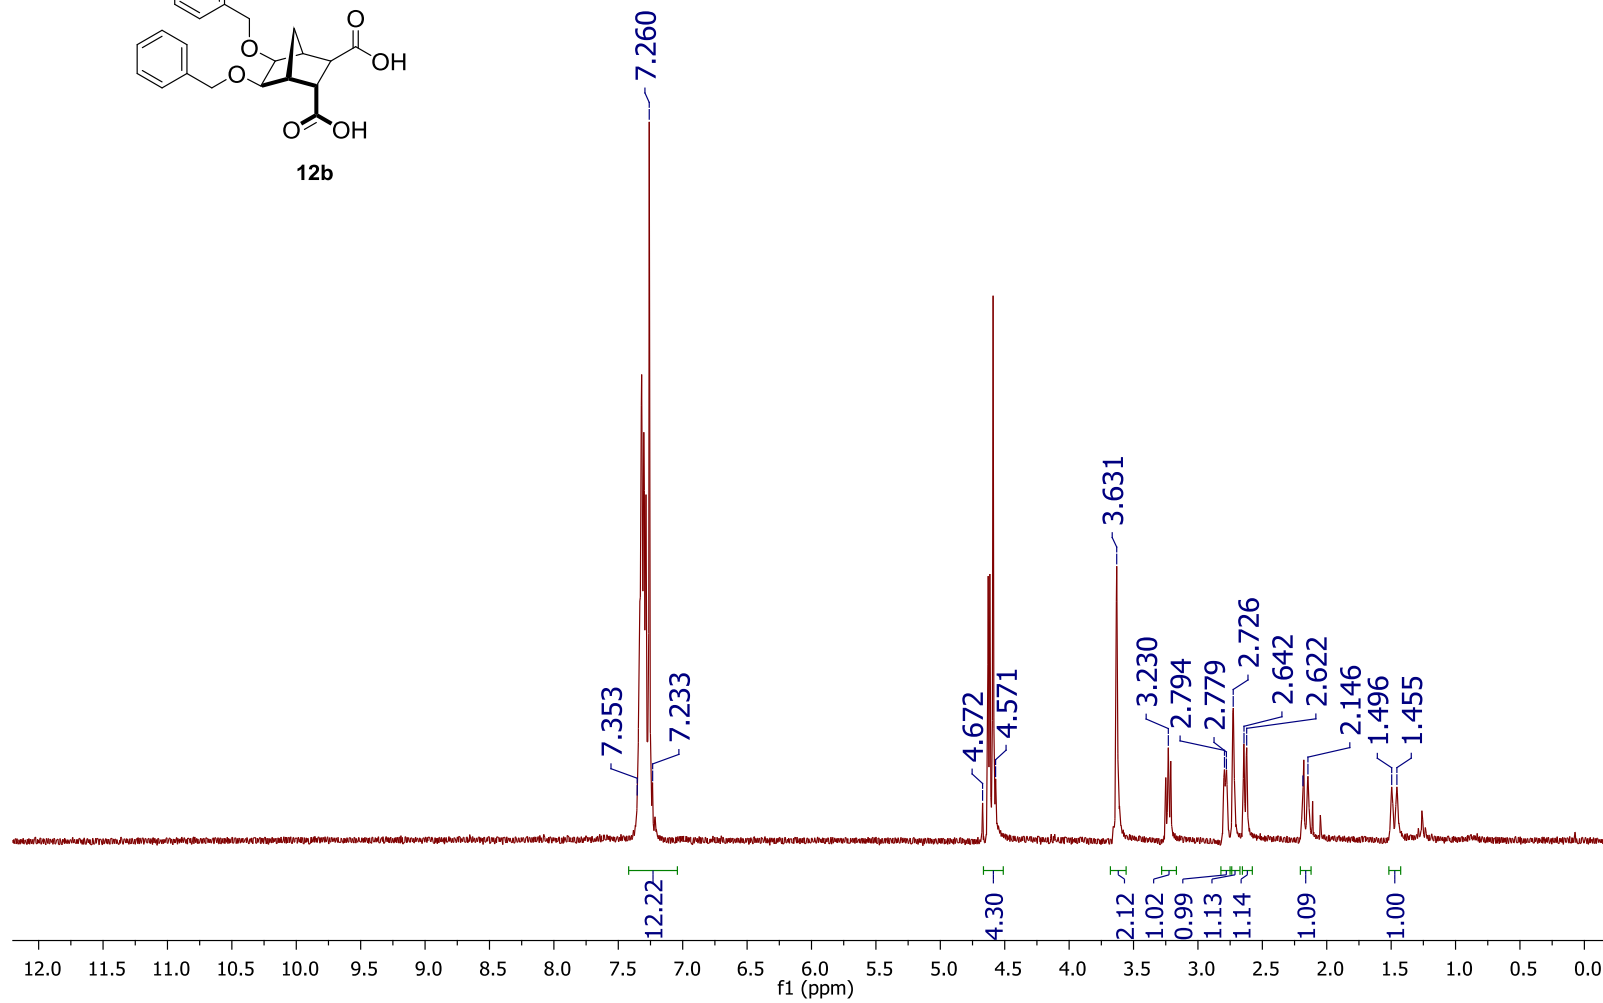

Shane/SMH05-121B-CARBON  
Single Pulse with Broadband Decoupling

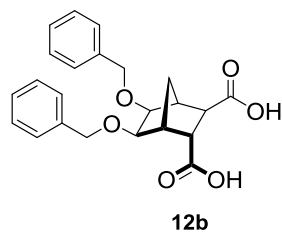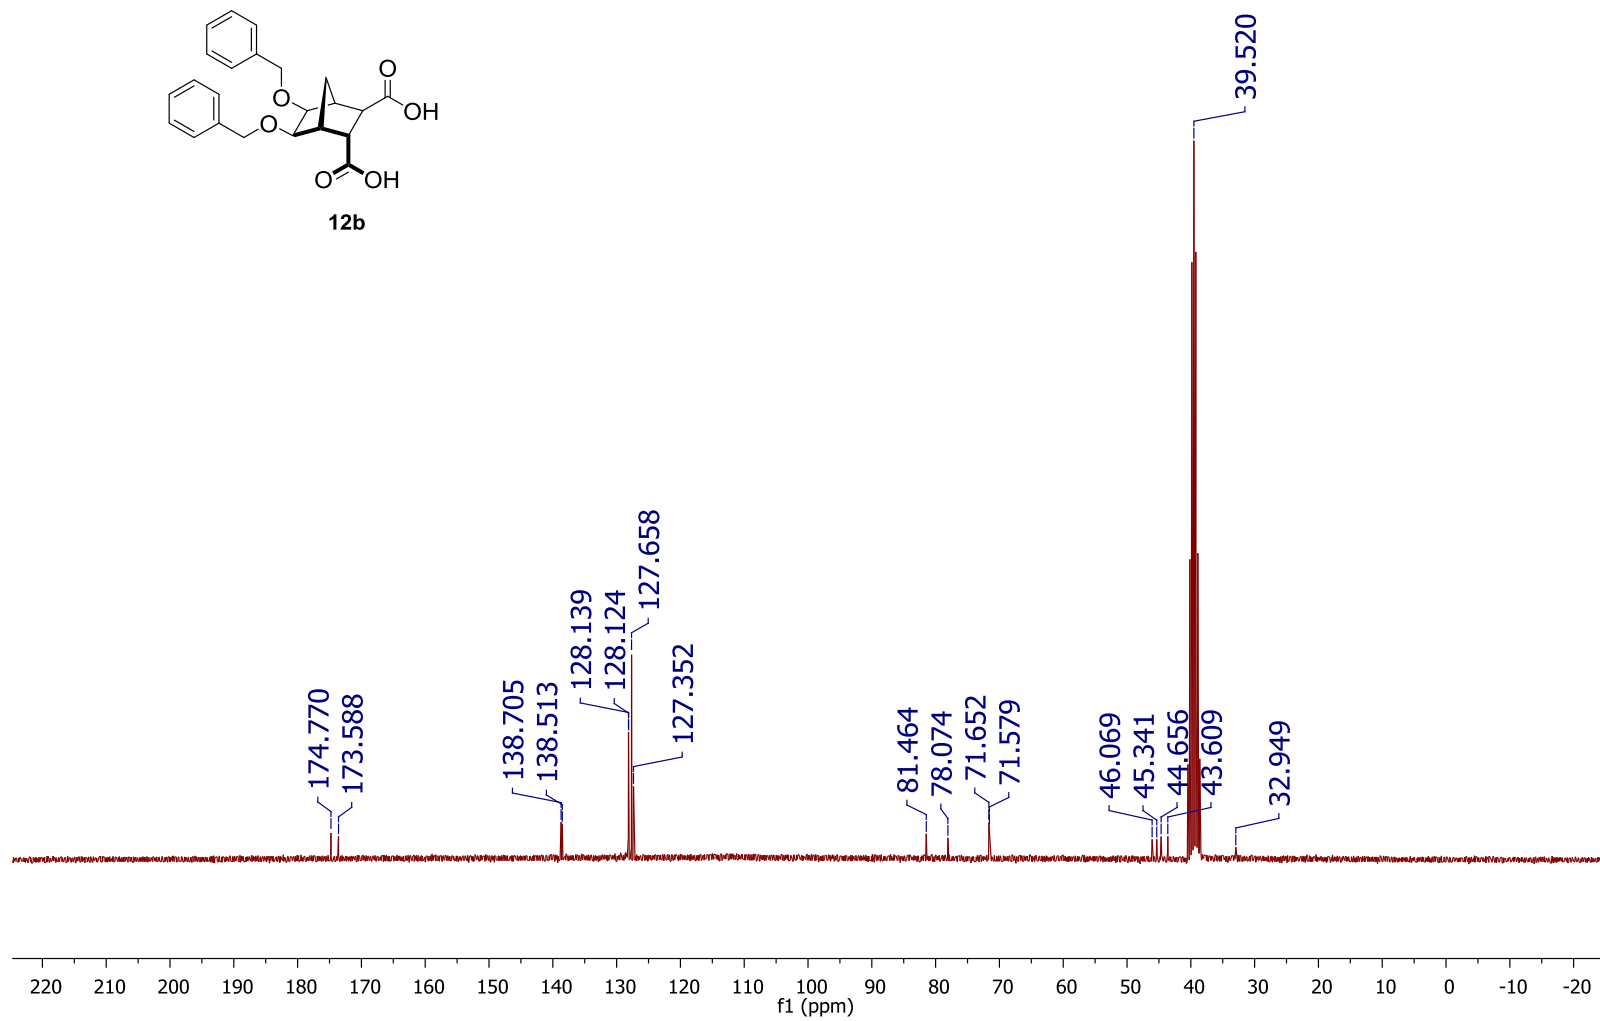

SMH07-123A  
 SMH07-123A - <sup>1</sup>H  
 PROTON DMSO {C:\Data\_500\Shane} nmr 3

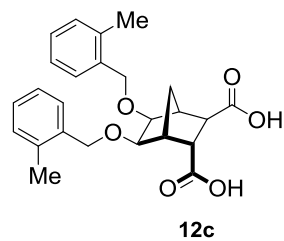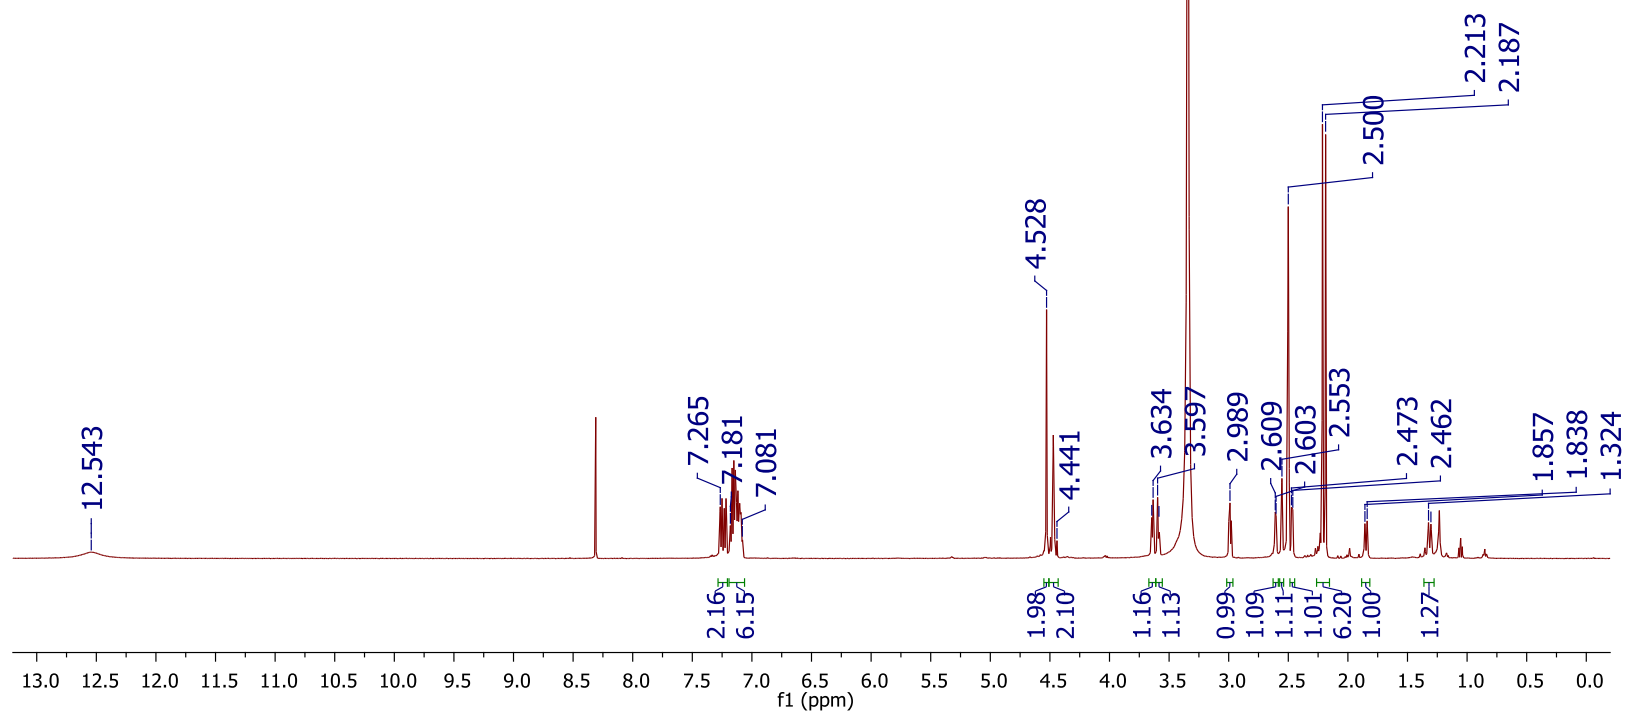

SMH07-123A  
SMH07-123A - <sup>13</sup>C  
C13CPD DMSO {C:\Data\_500\Shane} nmr 3

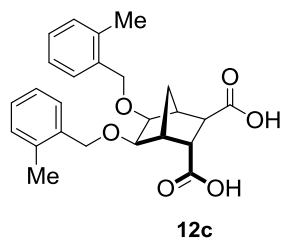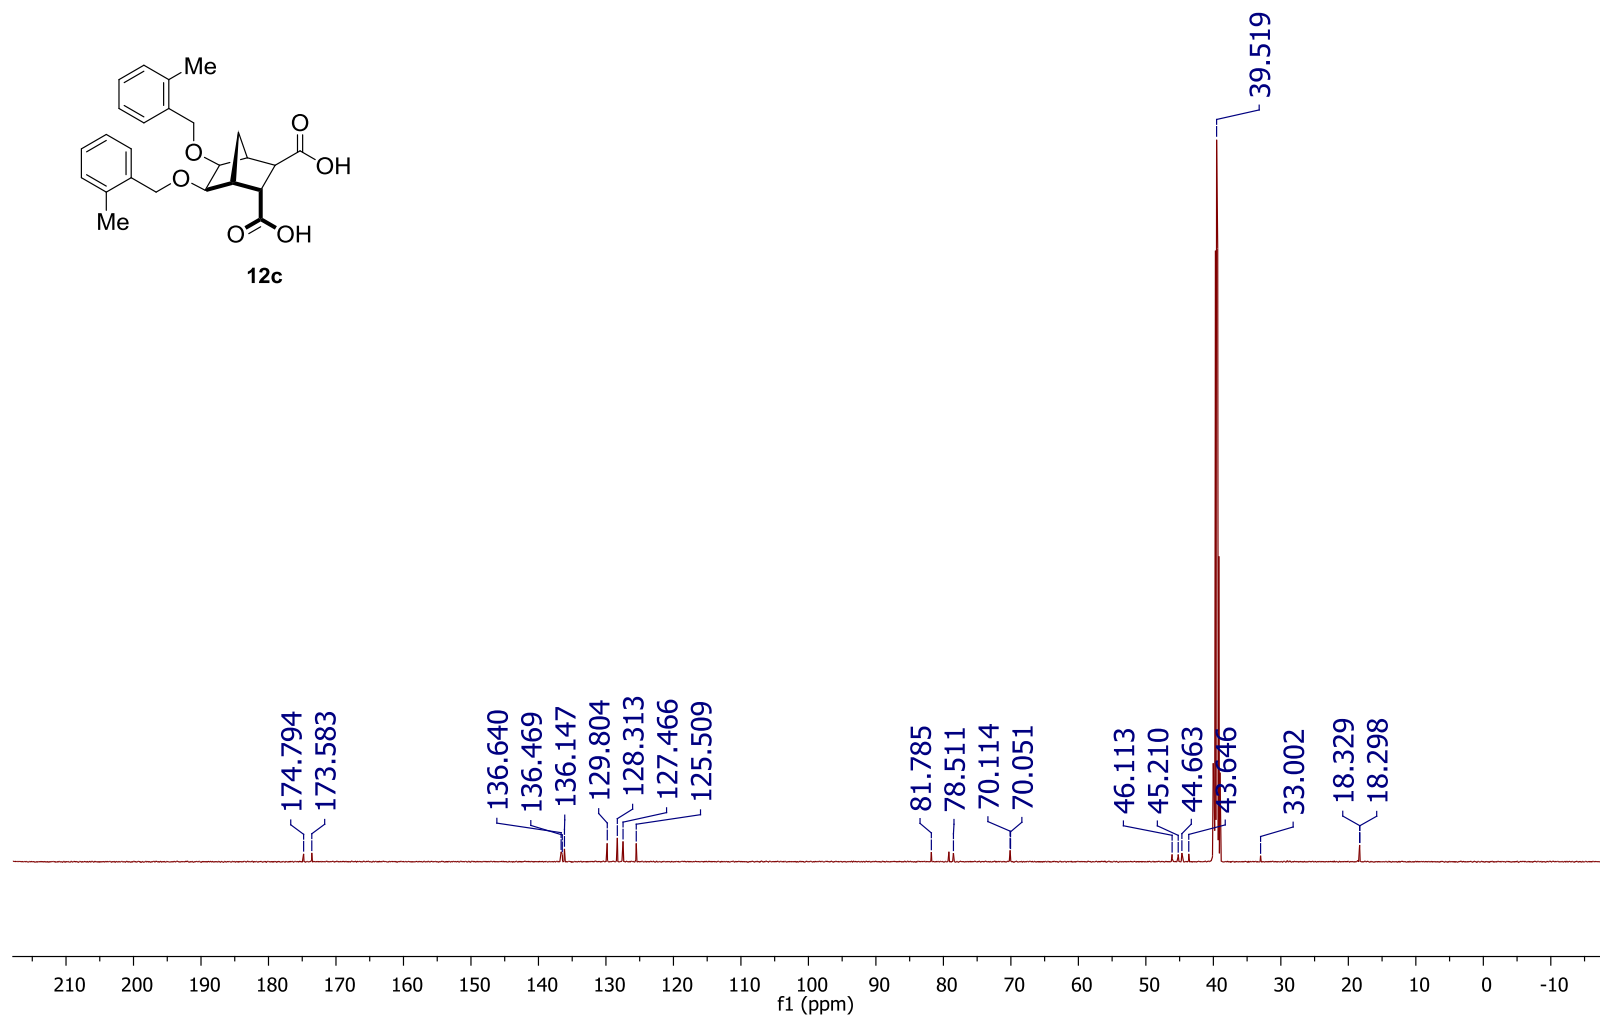

SMH08-031B  
 SMH08-031B - 1H  
 PROTON DMSO {C:\Data\_500\Shane} nmr 2

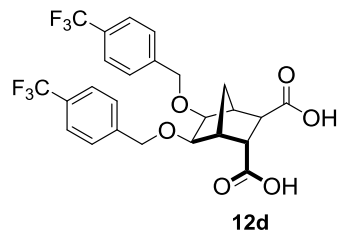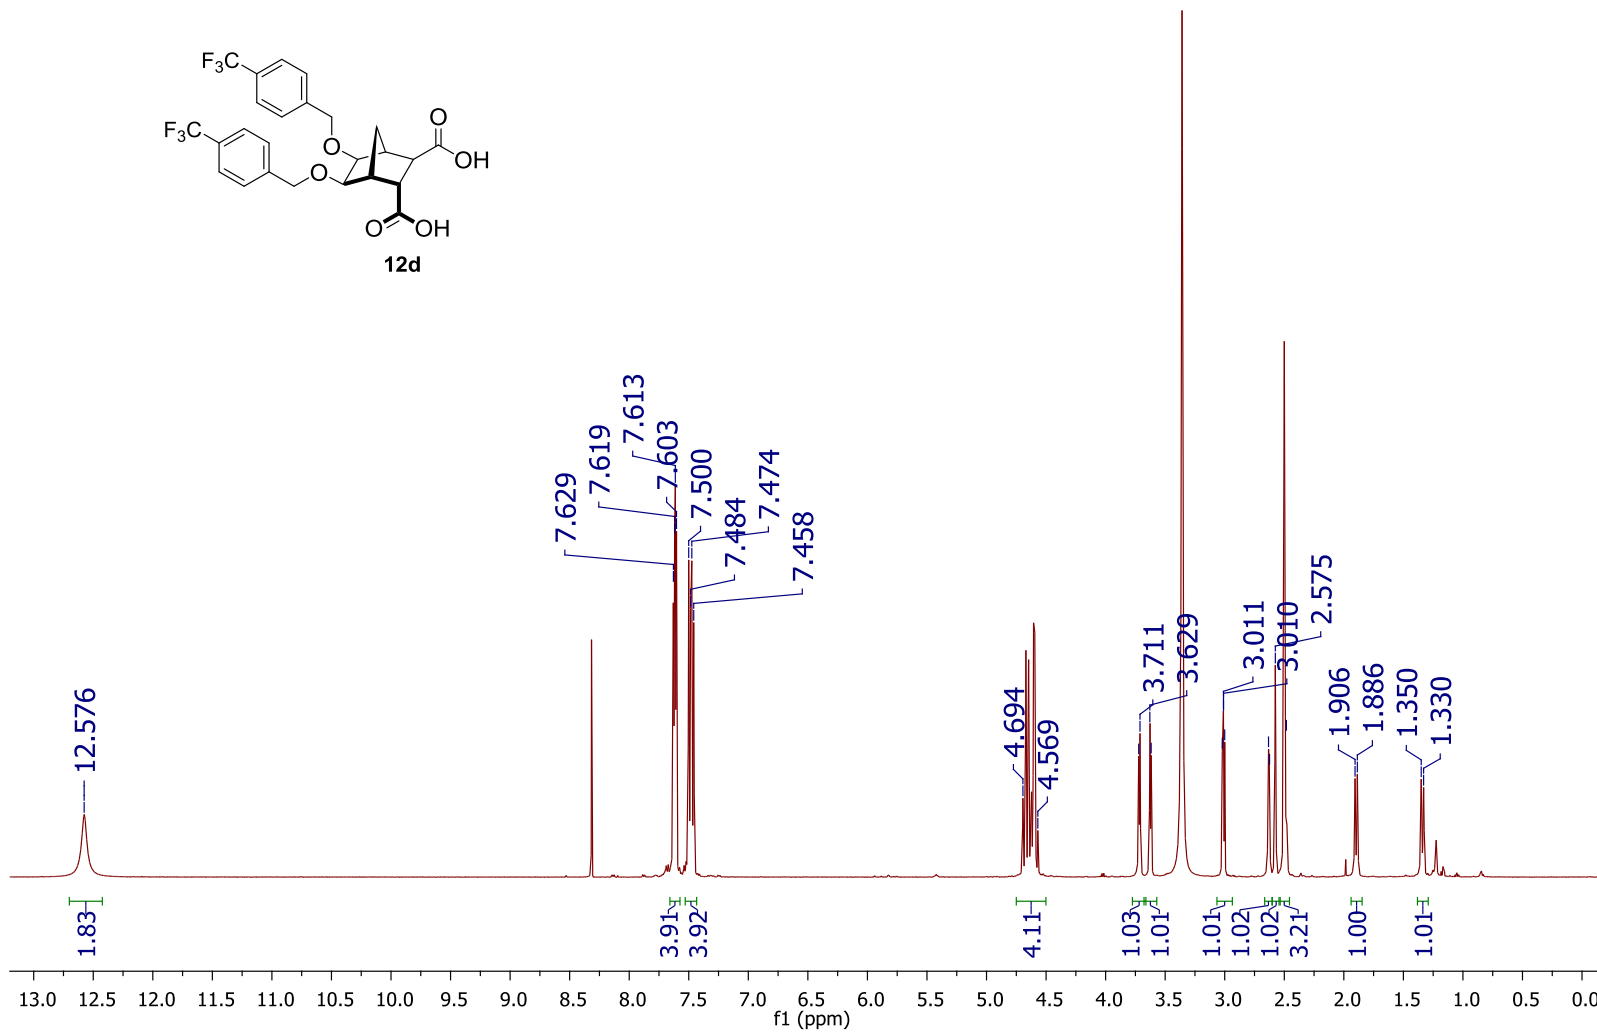



SMH08-031B  
SMH08-031B - 13C  
C13CPD DMSO {C:\Data\_500\Shane} nmr 2

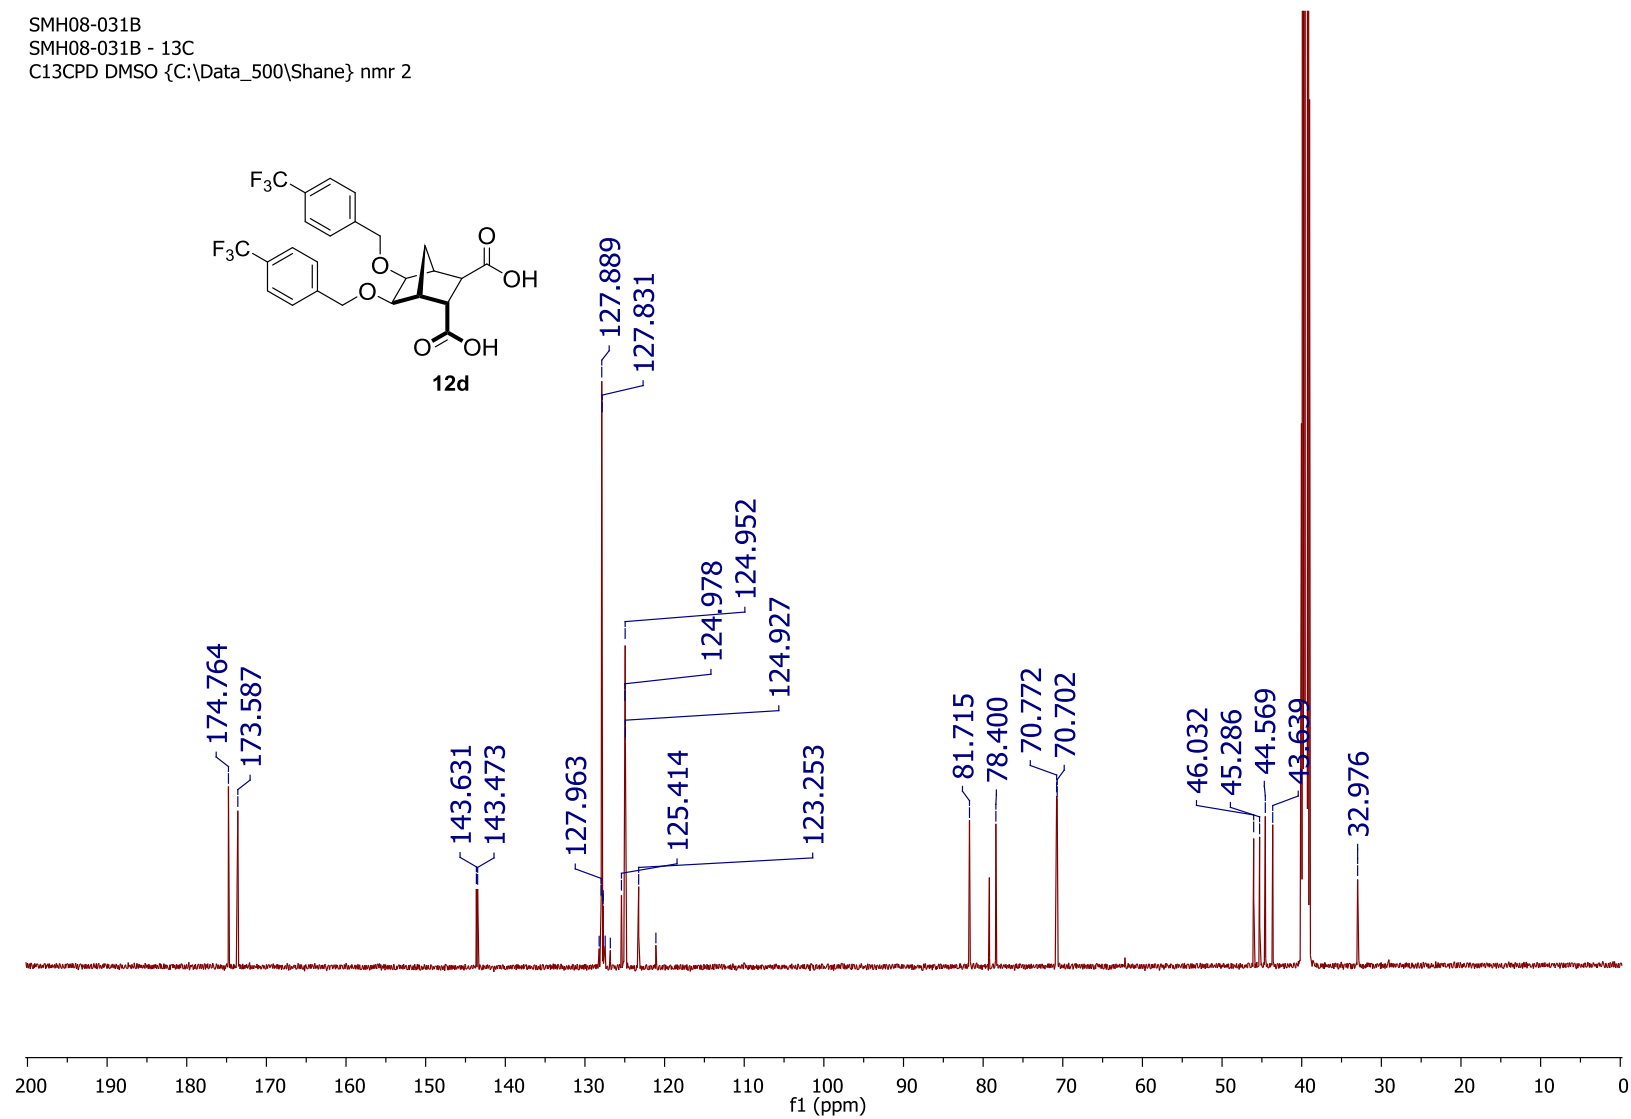

SMH08-031B  
SMH08-031B-19F

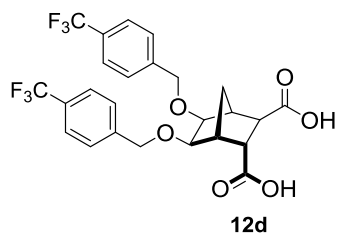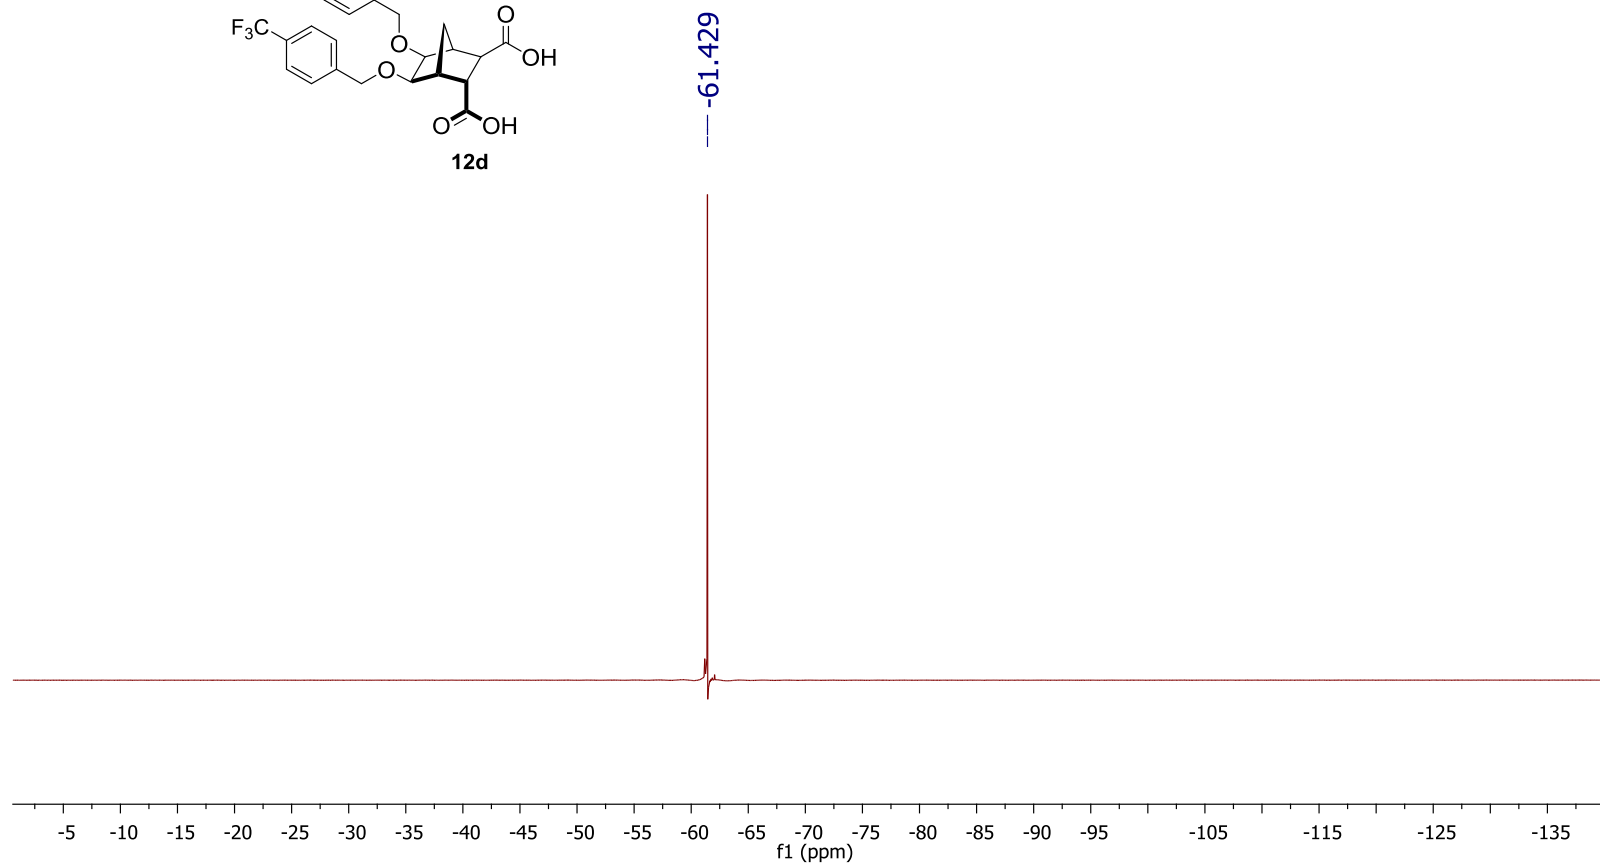

SMH08-053B  
 SMH08-053B - 1H  
 PROTON MeOD {C:\Data\_500\Shane} nmr 5

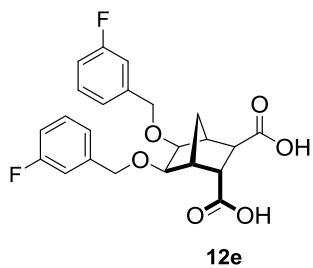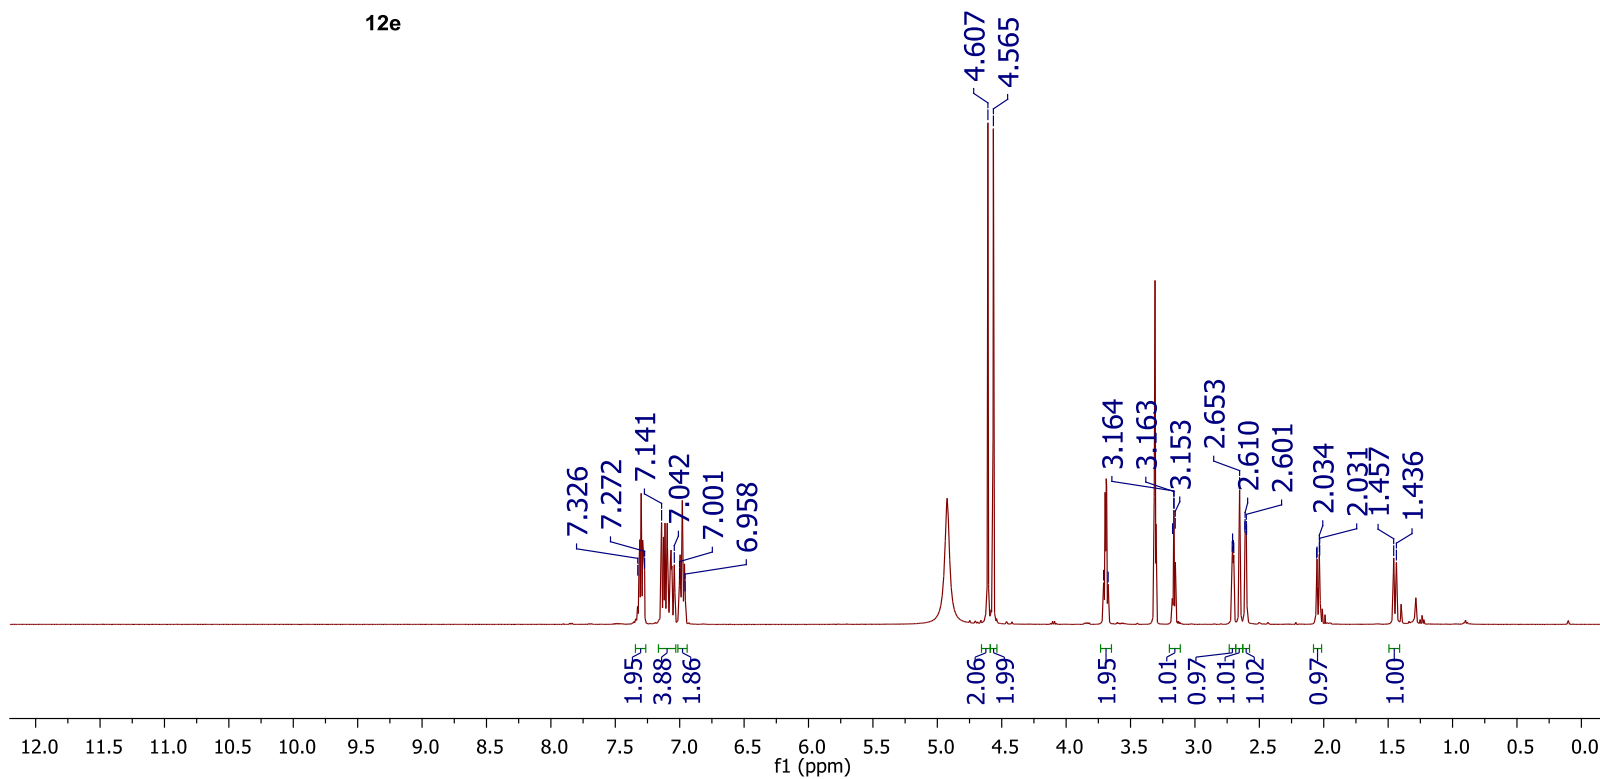

SMH08-053B  
SMH08-053B - <sup>13</sup>C  
C13CPD MeOD {C:\Data\_500\Shane} nmr 5

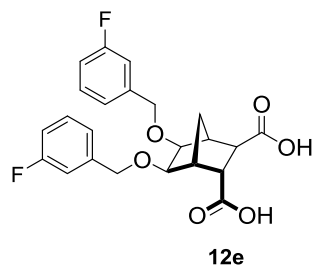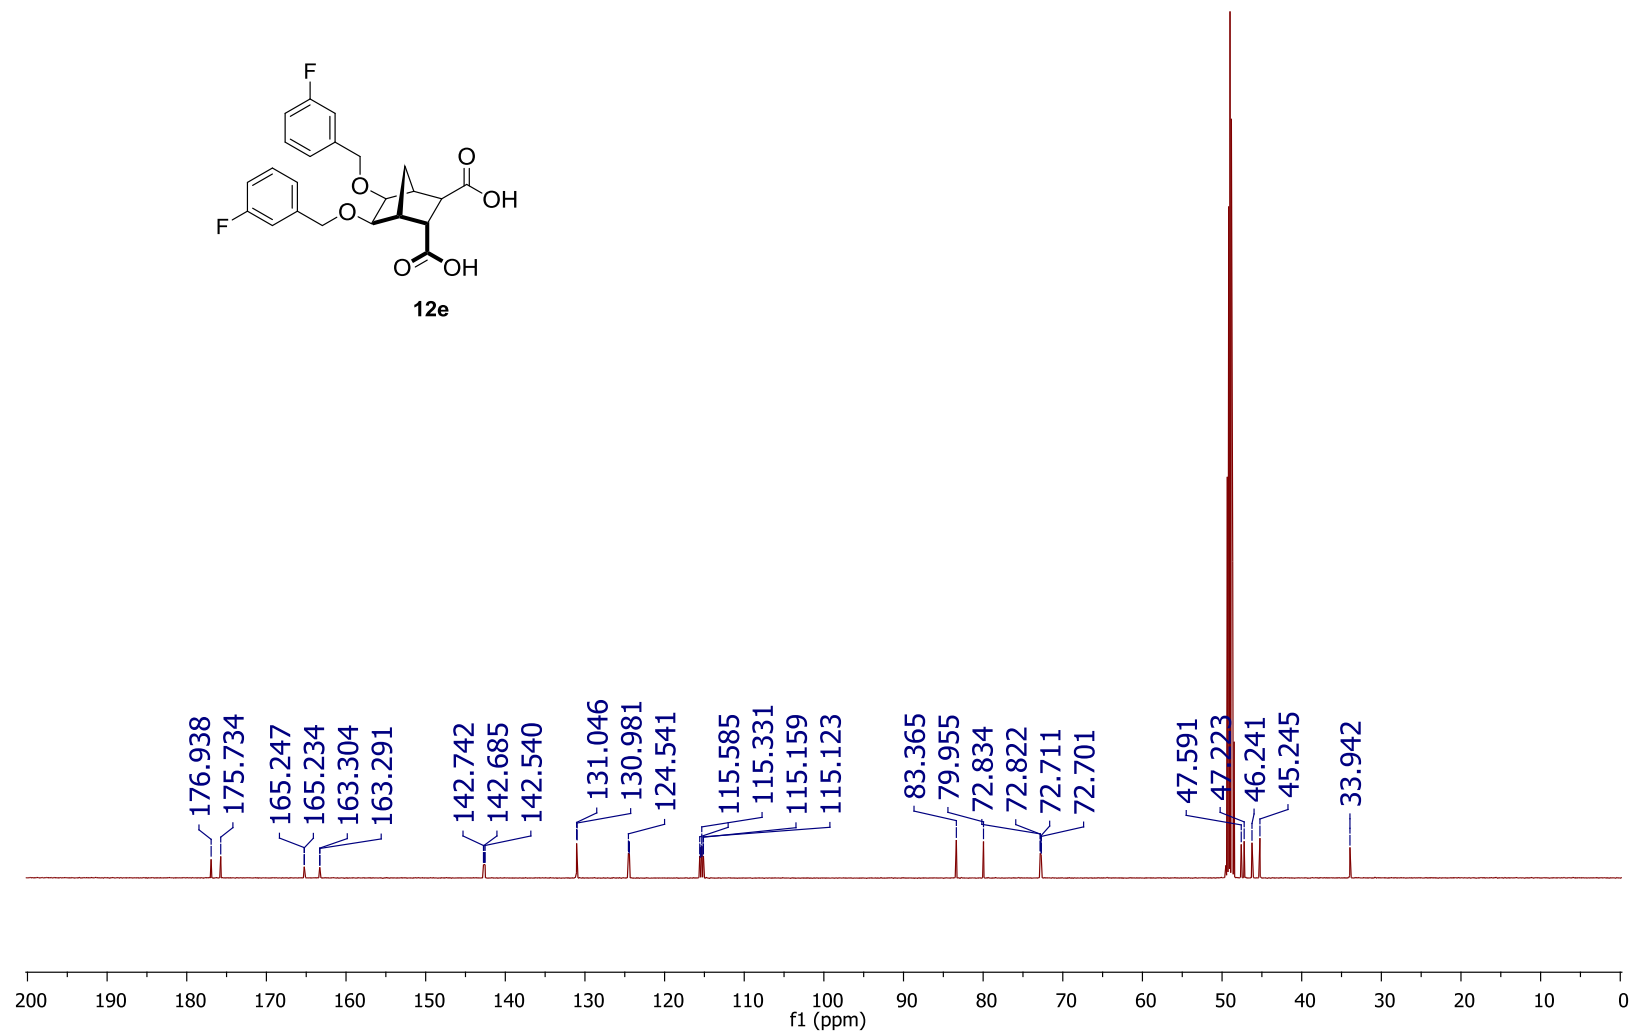

SMH08-053B  
SMH08-053B-19F

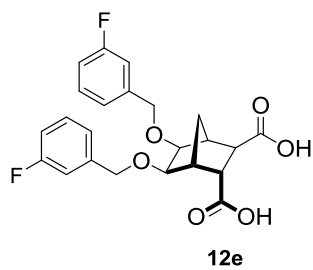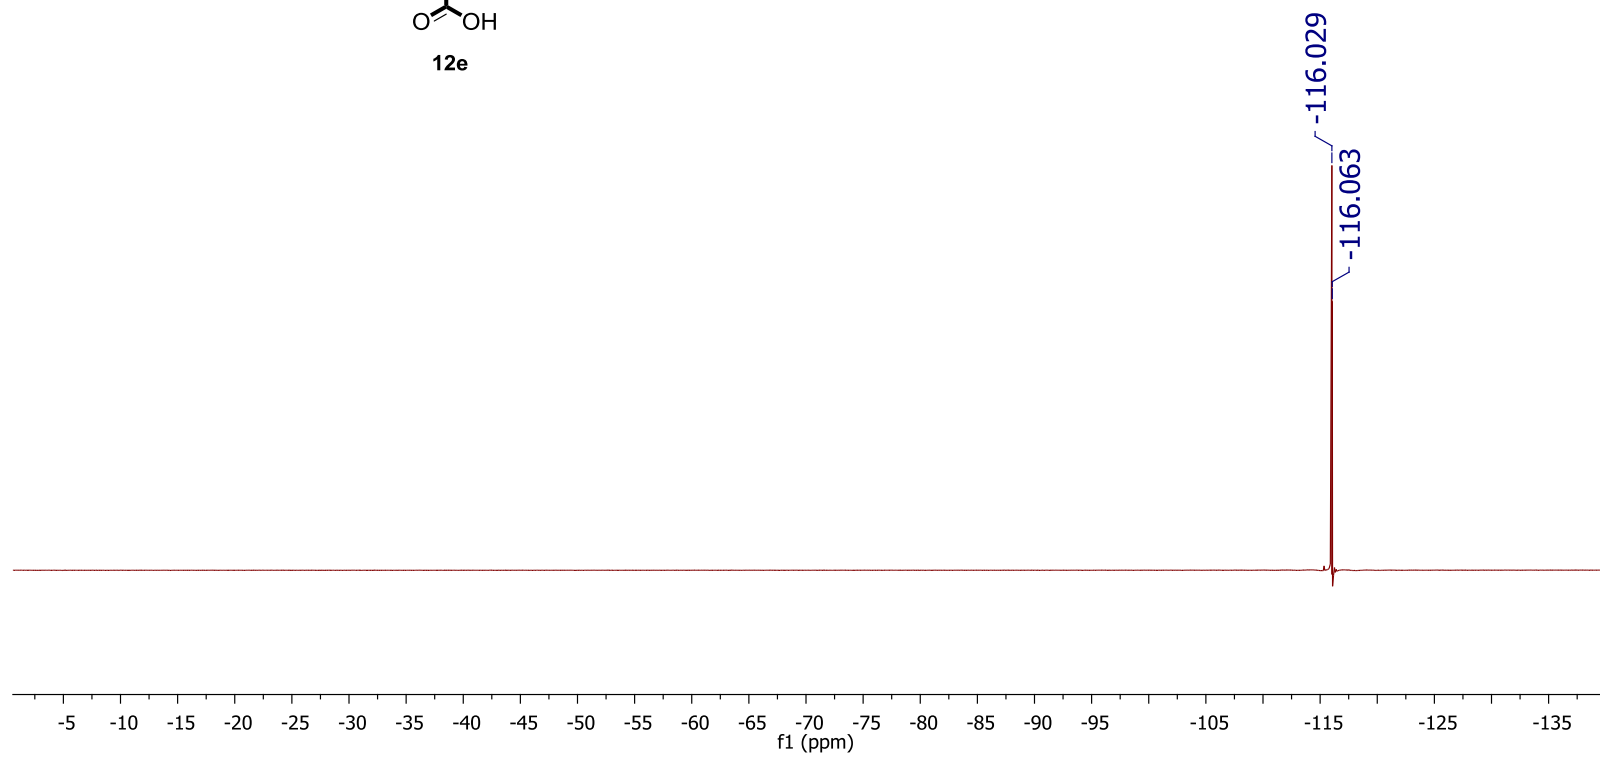

Shane/SMH06-153A  
Single Pulse Experiment

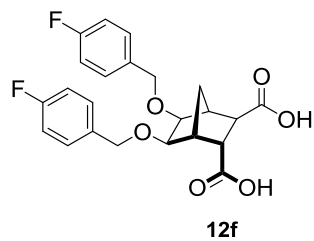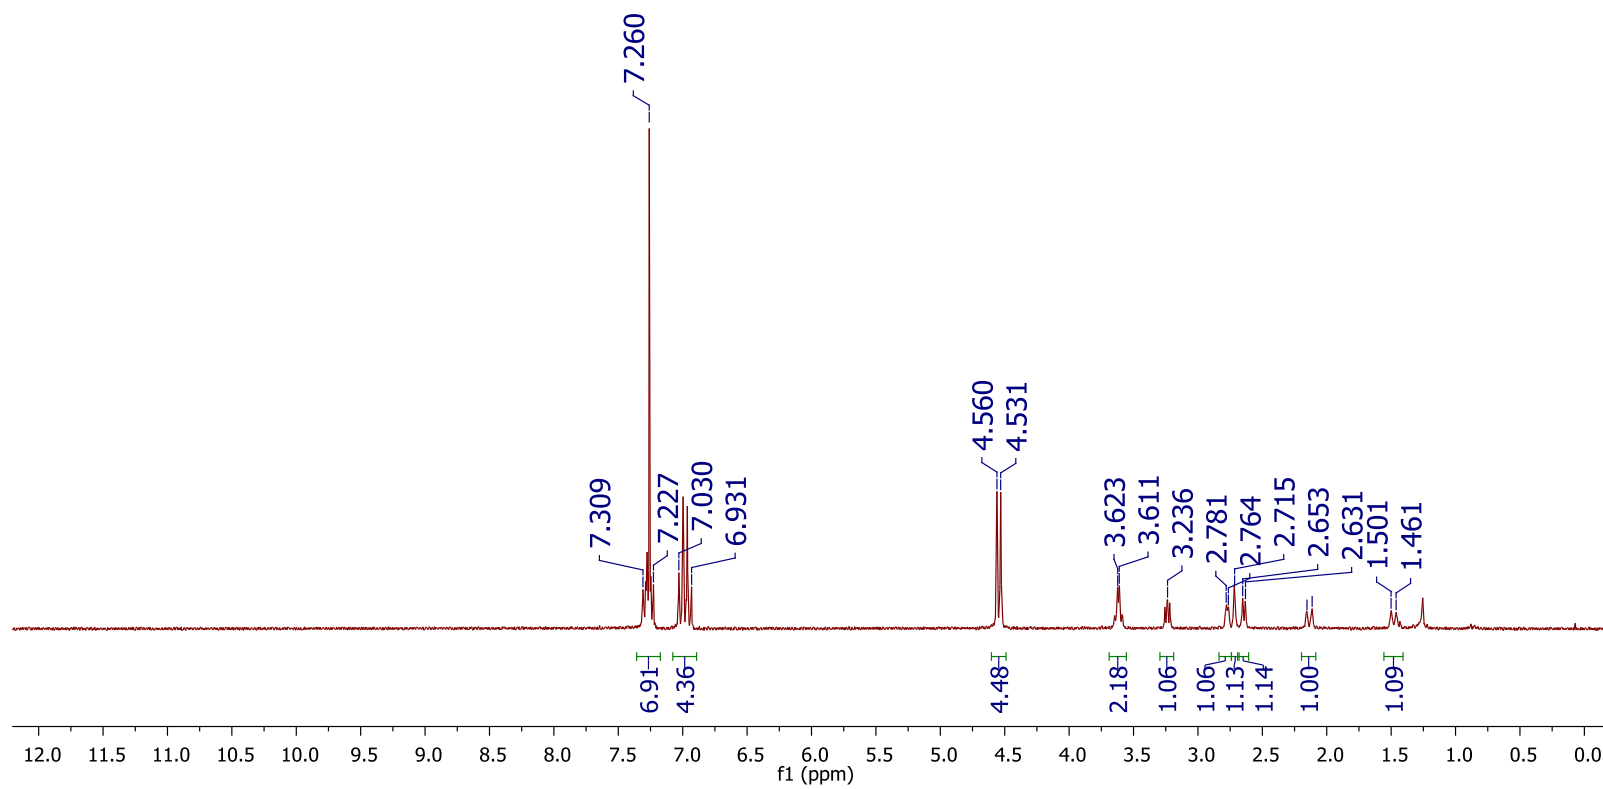

Shane/SMH06-153A-Carbon  
Single Pulse with Broadband Decoupling

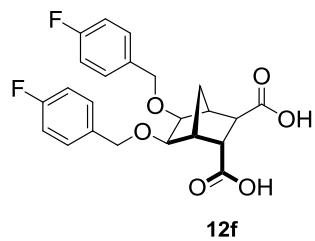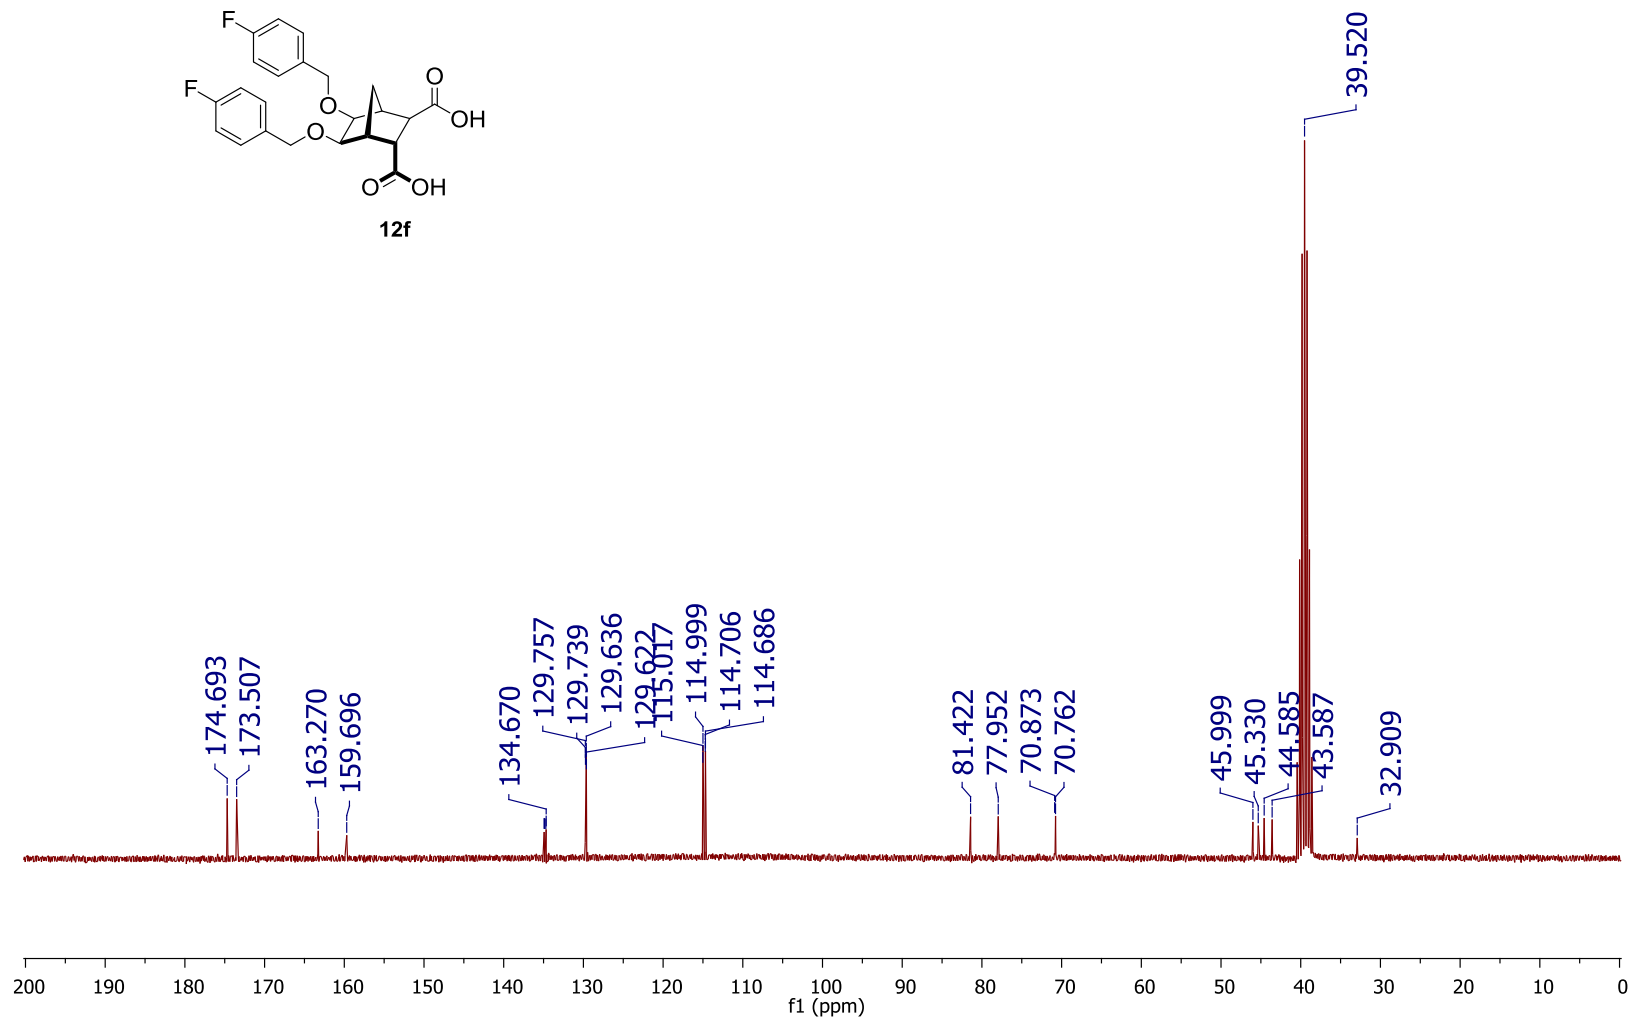

SMH08-145A  
SMH08-145A-19F

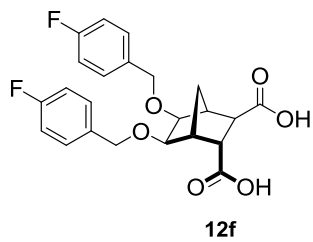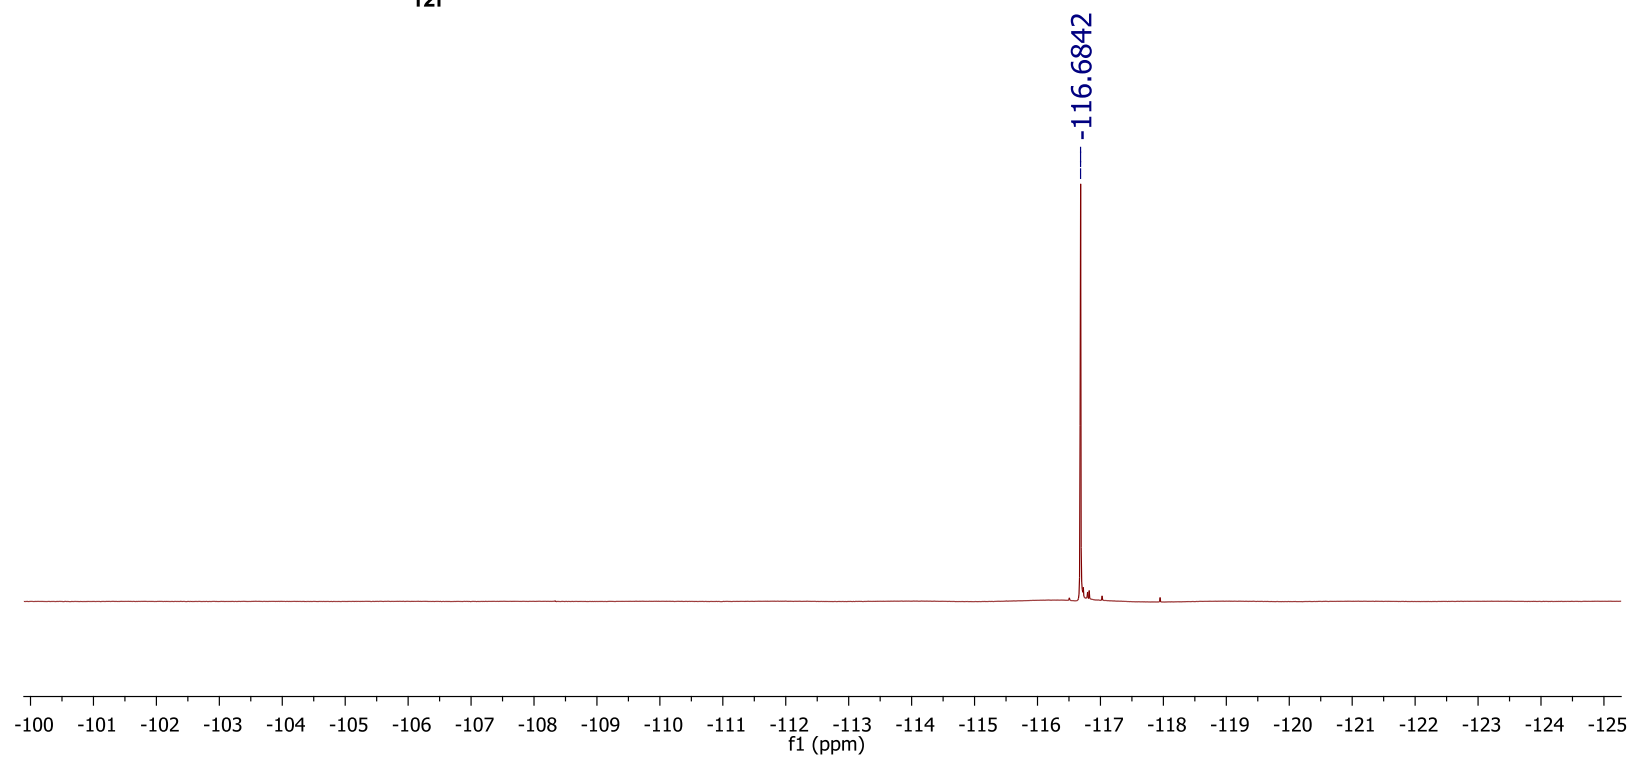



Shane/SMH06-139B  
Single Pulse Experiment

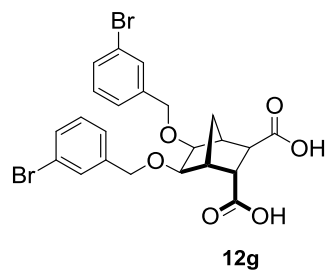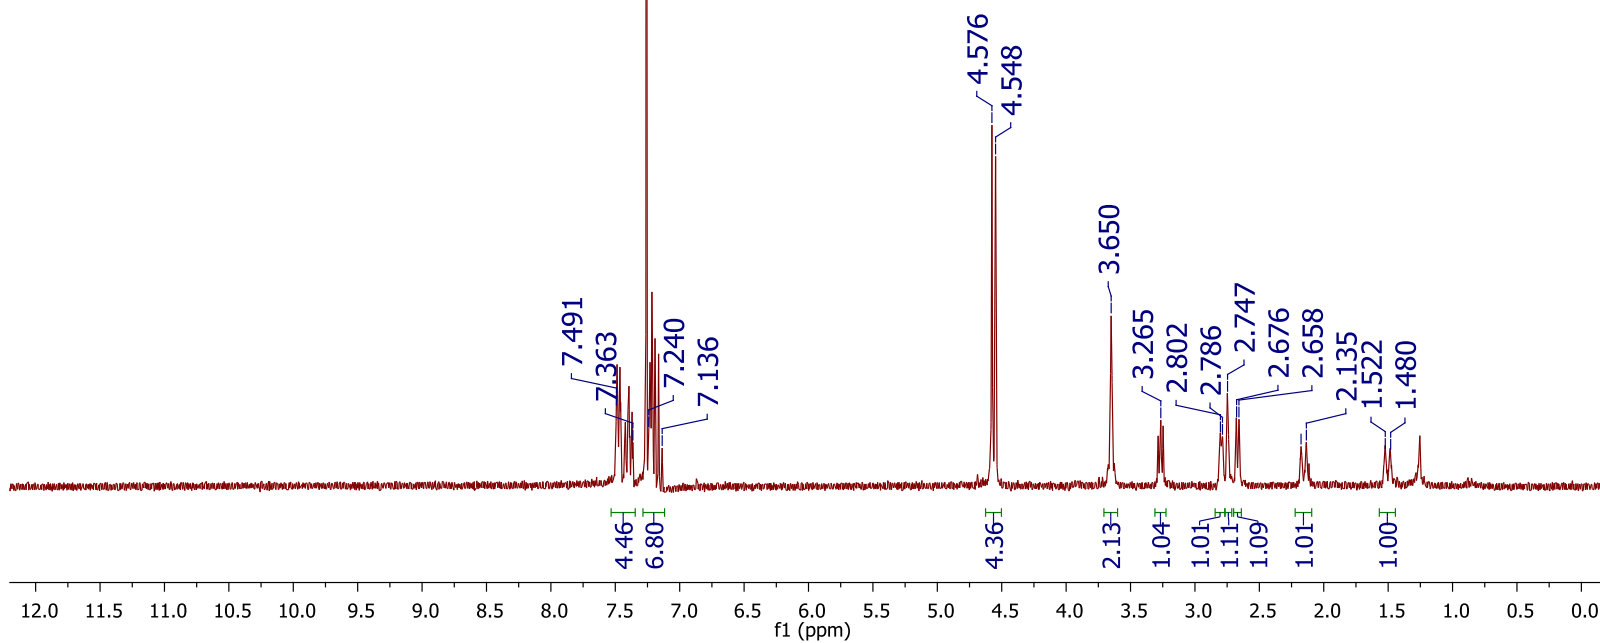

Shane/SMH06-139B-13C  
Single Pulse with Broadband Decoupling

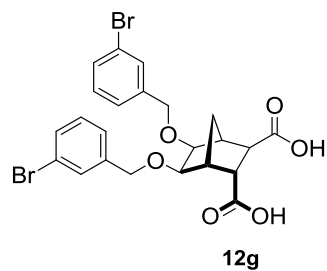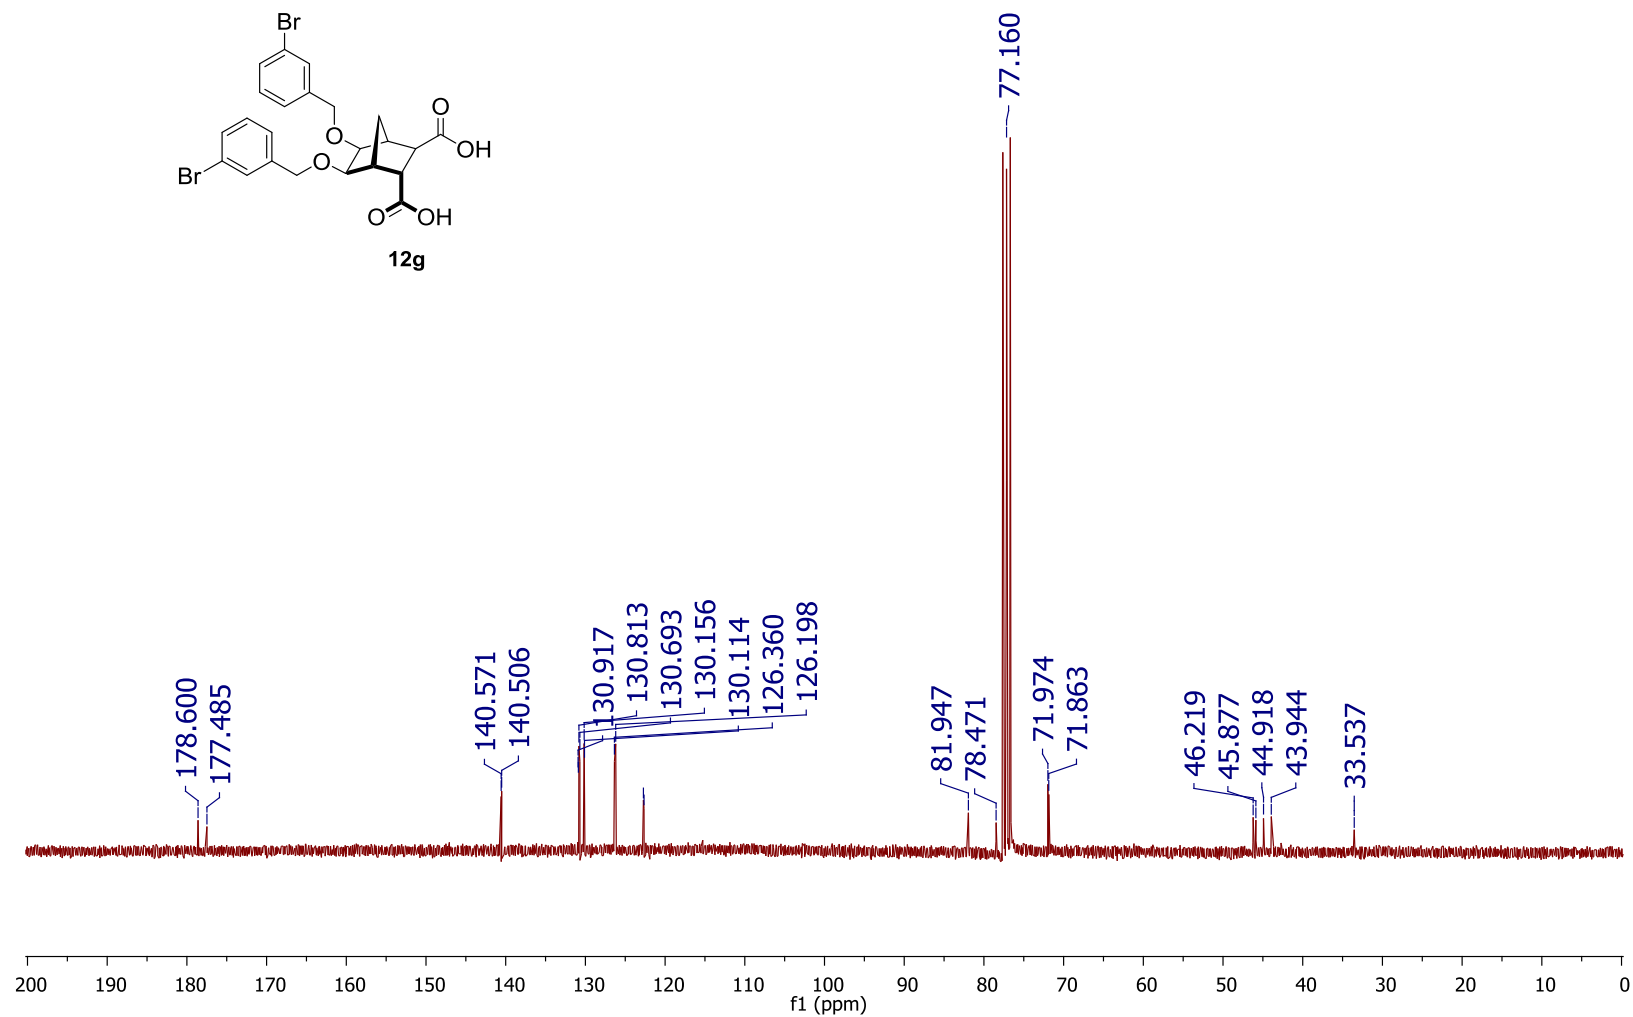

SMH06-129D  
 SMH06-129D - 1H  
 PROTON MeOD {C:\Data\_500\Shane} nmr 15

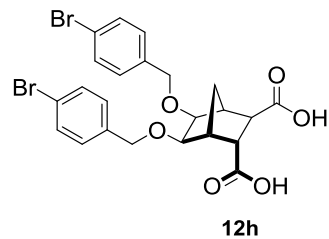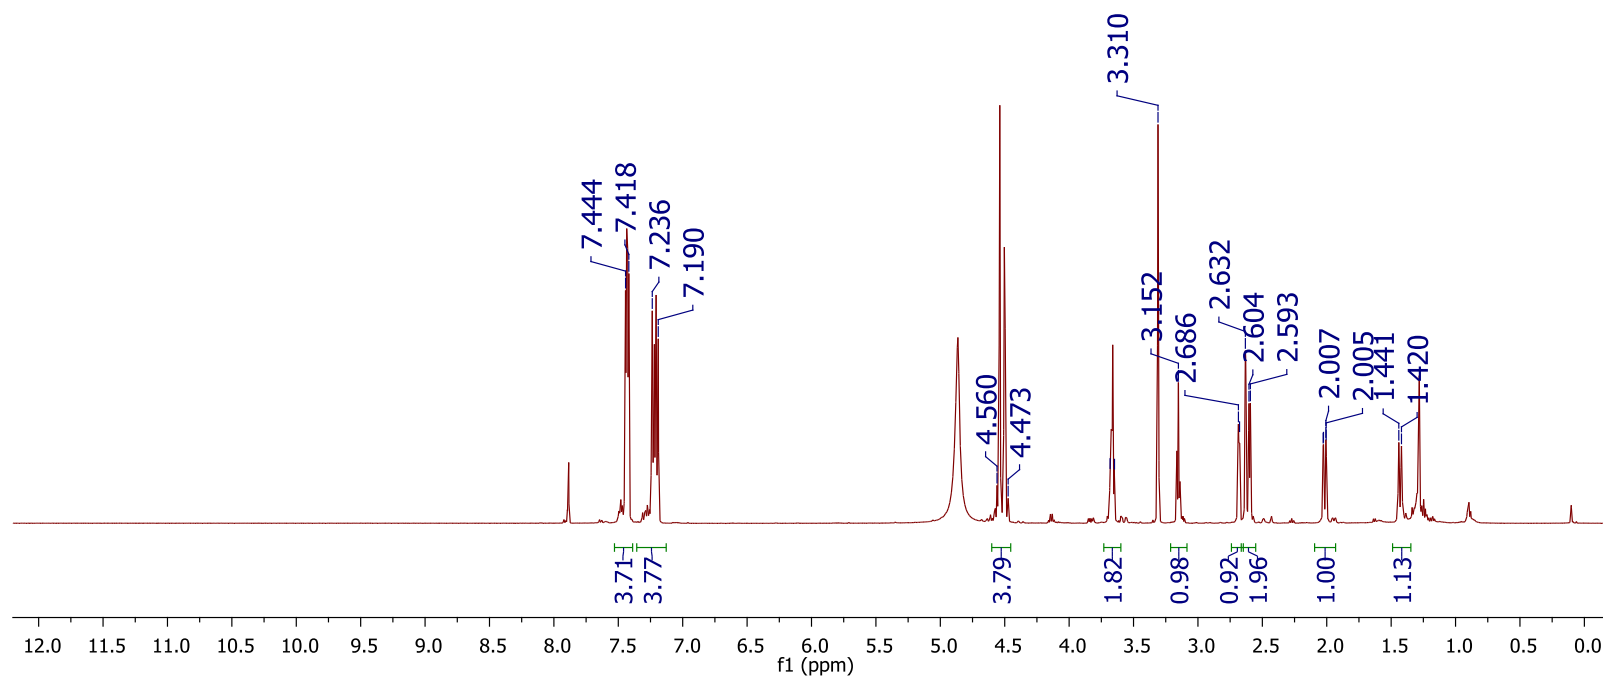

SMH06-129D  
SMH06-129D - 13C  
C13CPD MeOD {C:\Data\_500\Shane} nmr 15

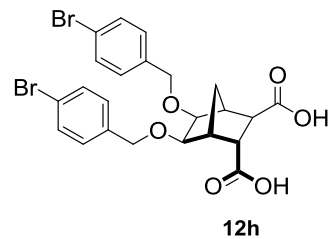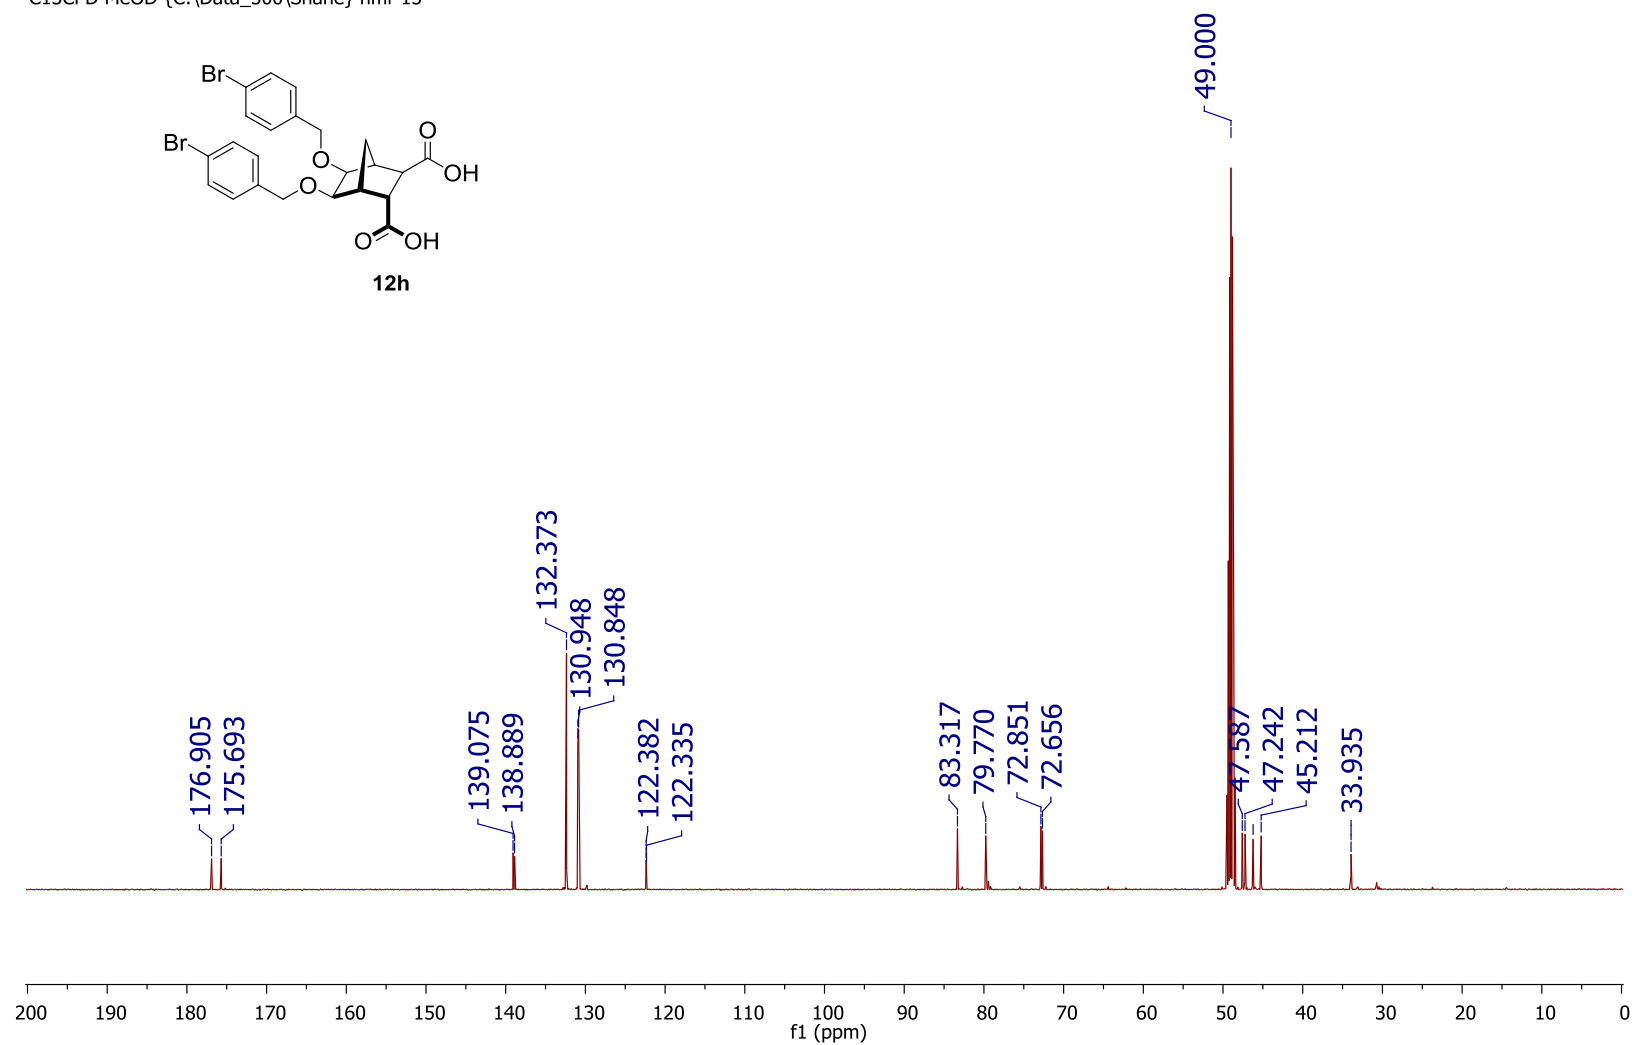

Shane/SMH06-045B  
Single Pulse Experiment

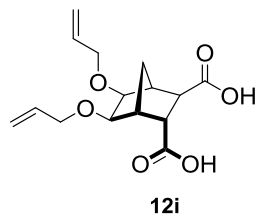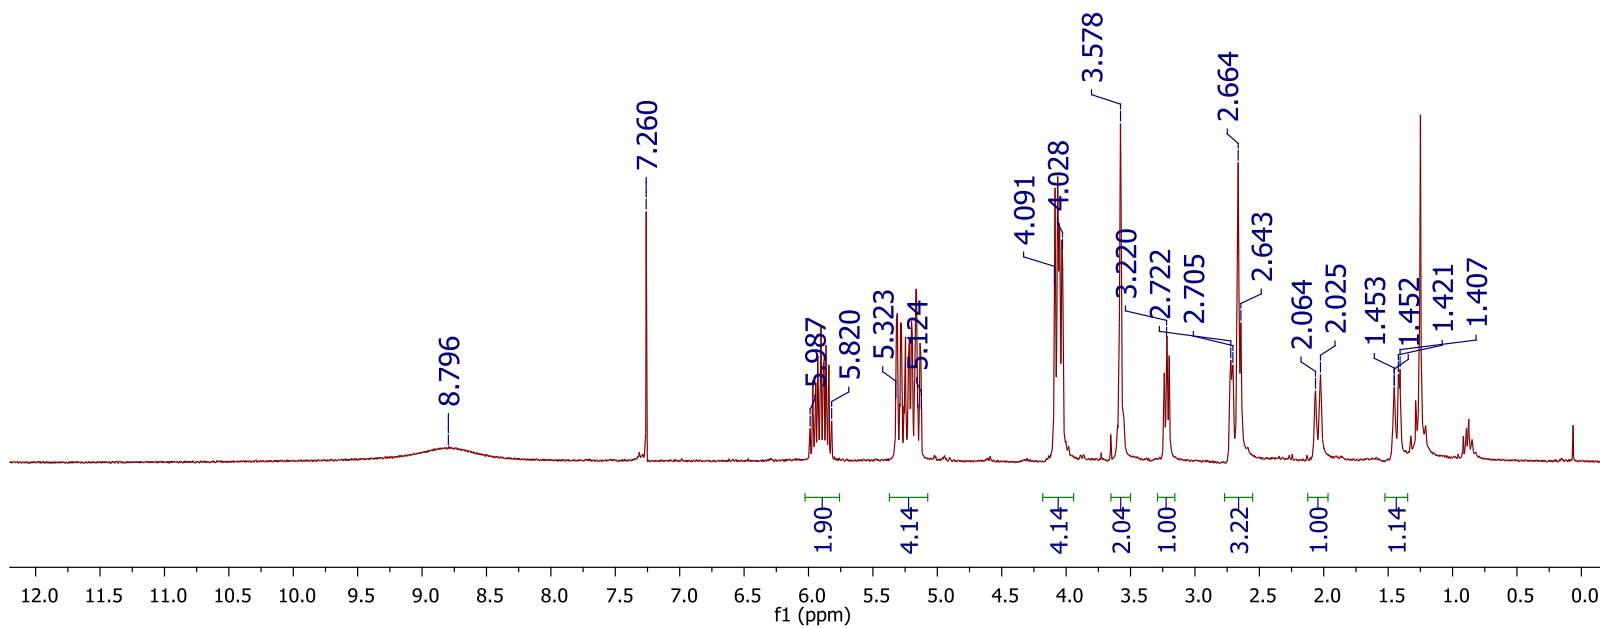

SMH06-045B  
SMH06-045B 13C  
C13CPD CDCl3 {C:\Data\_500\Shane} nmr 14

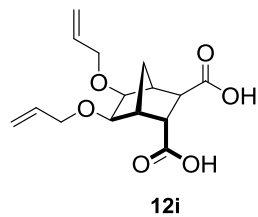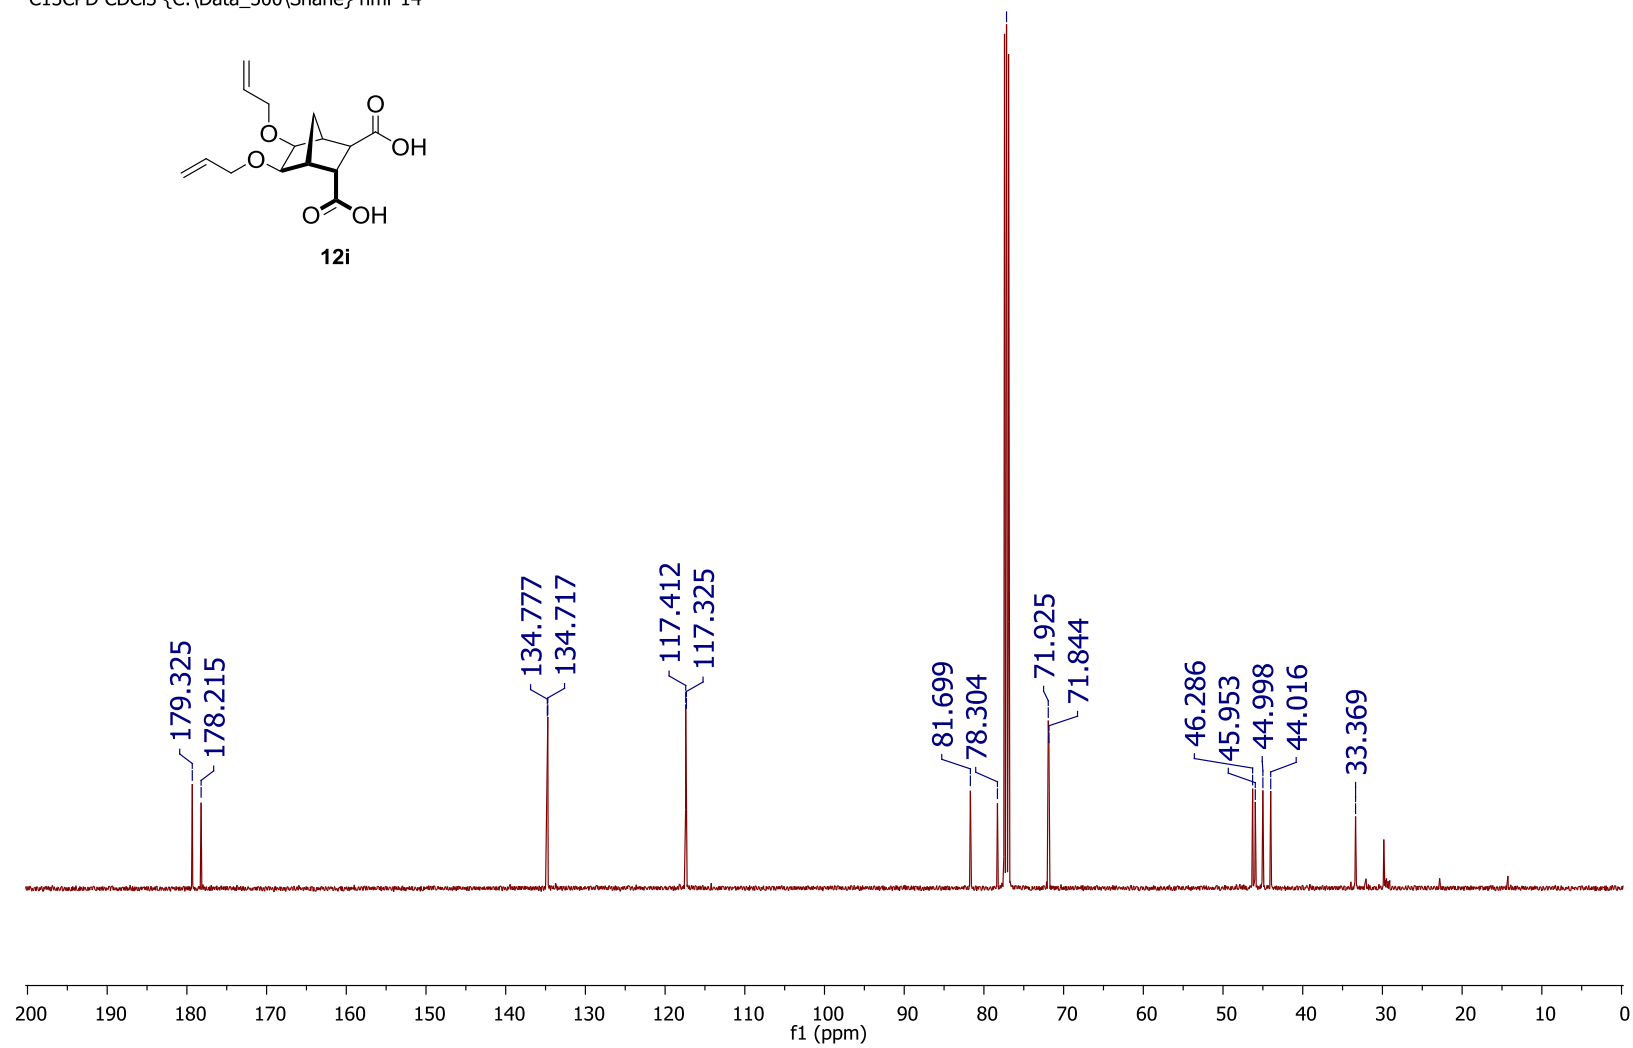

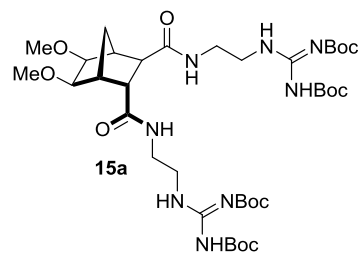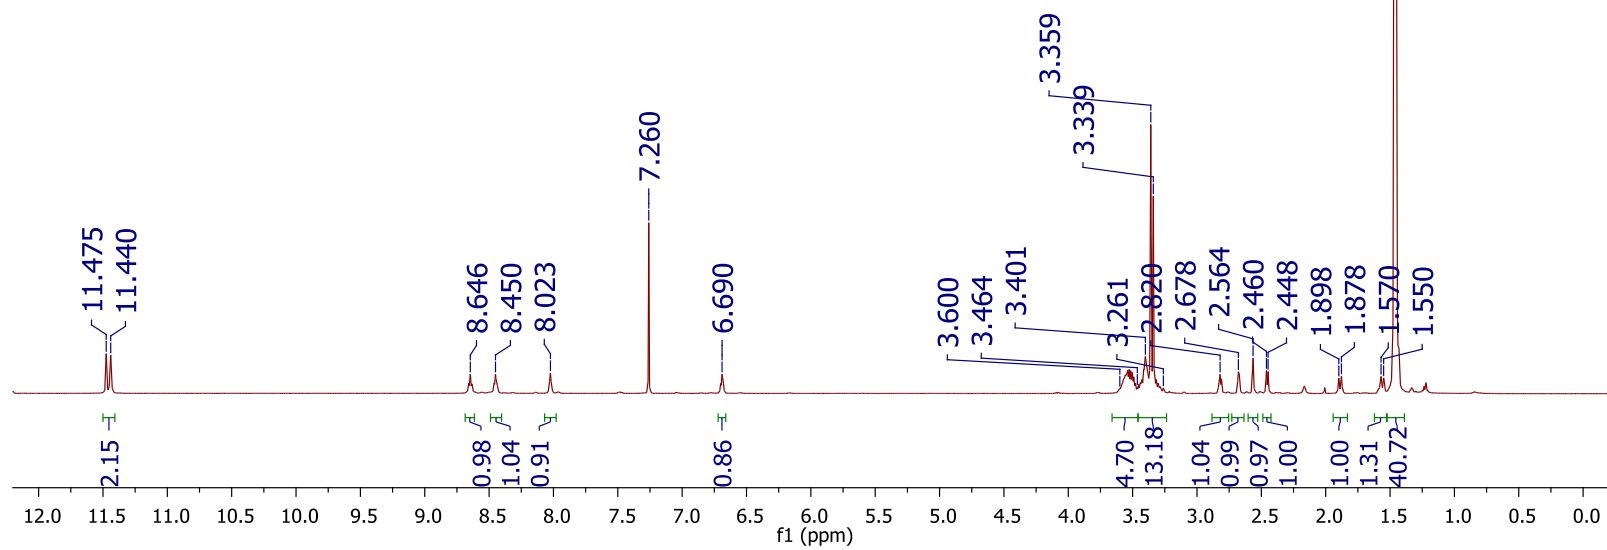

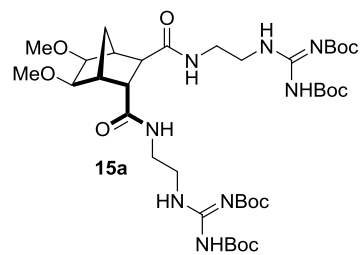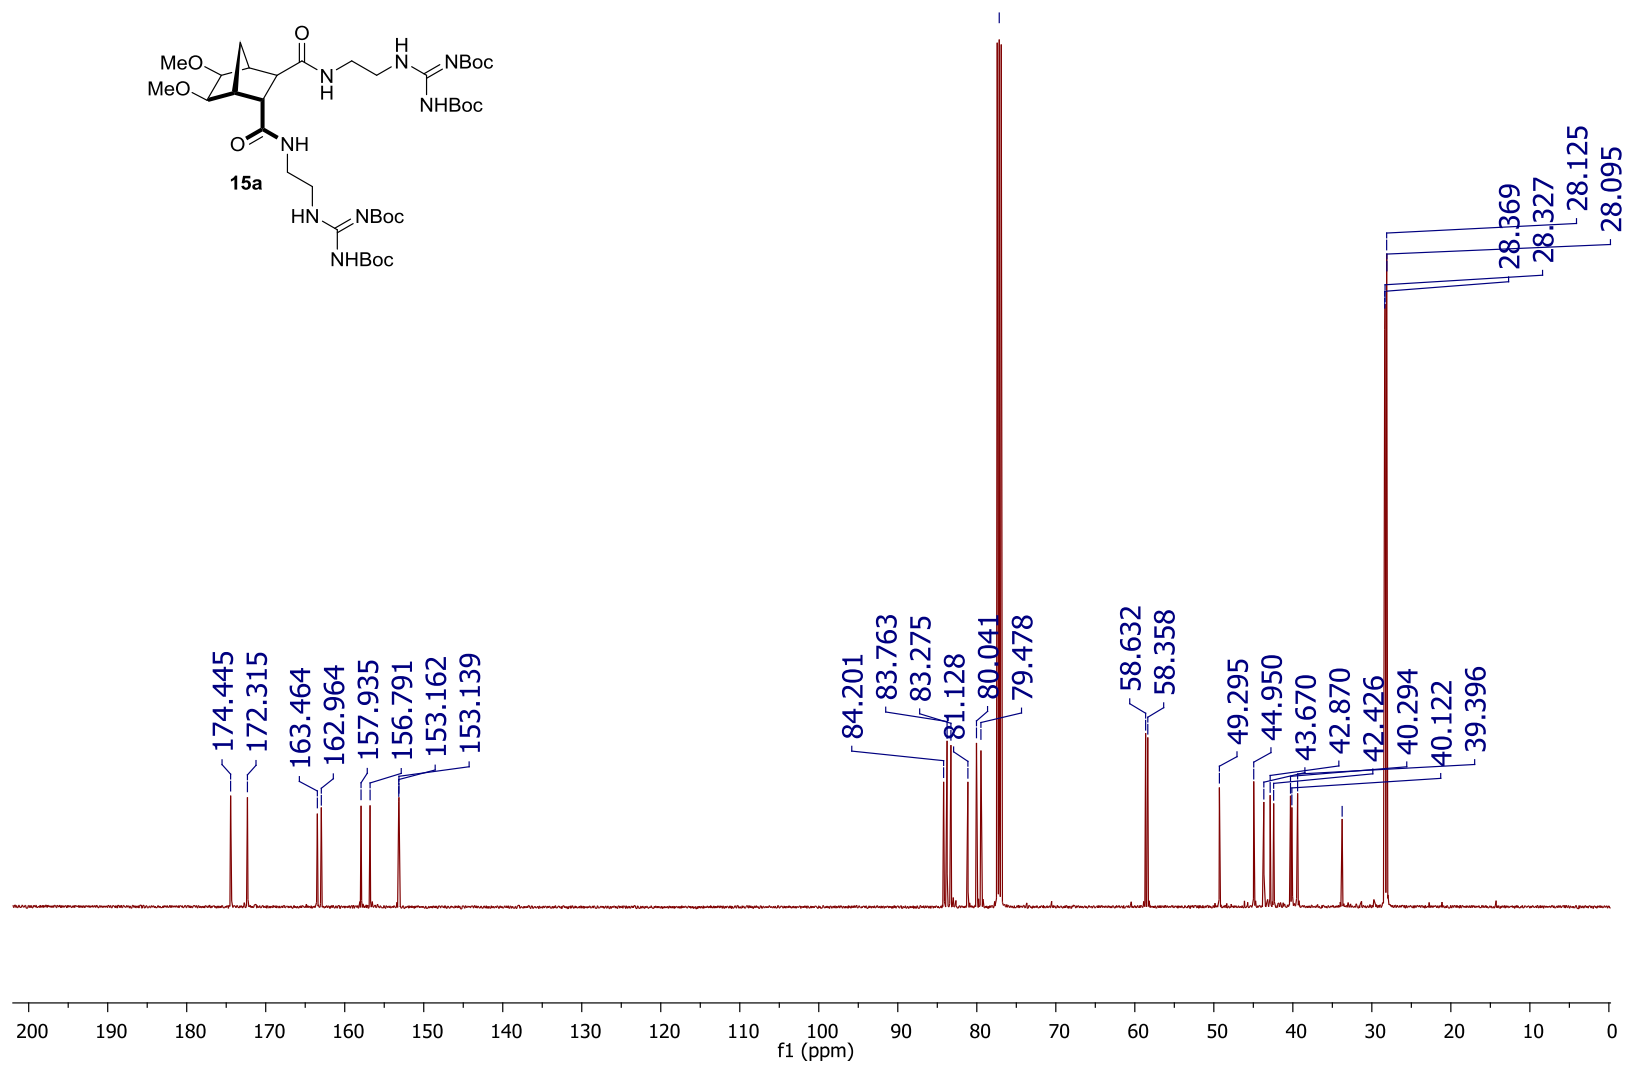



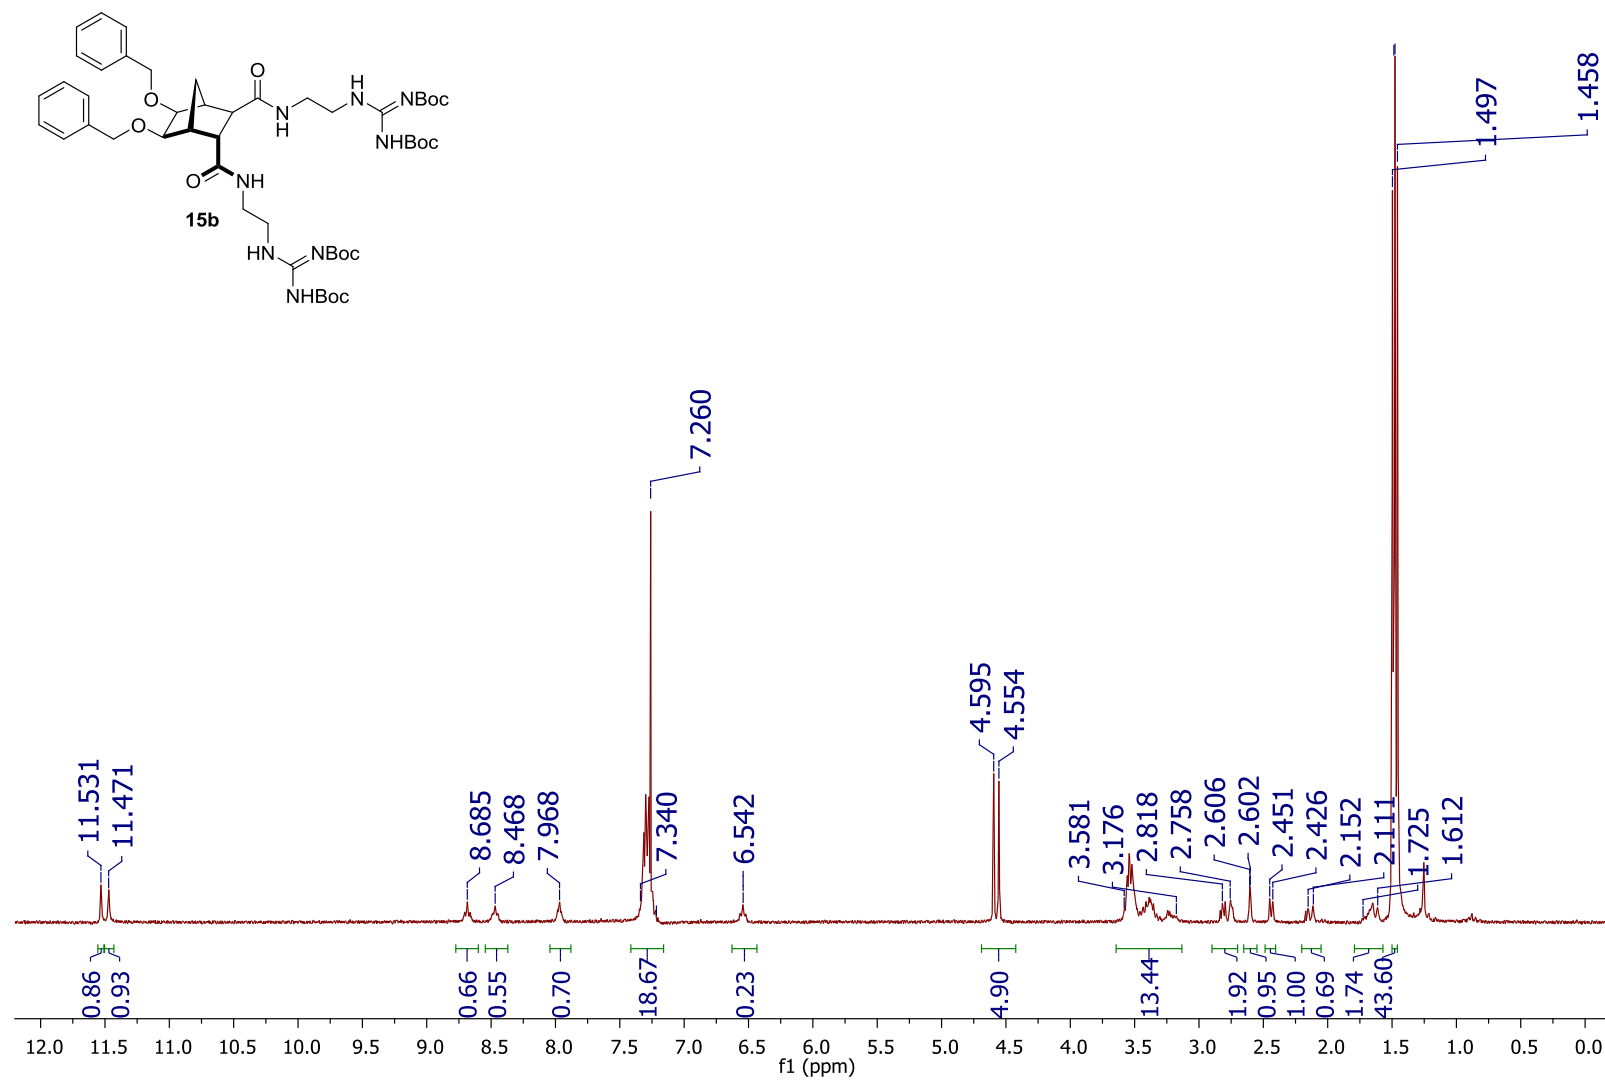

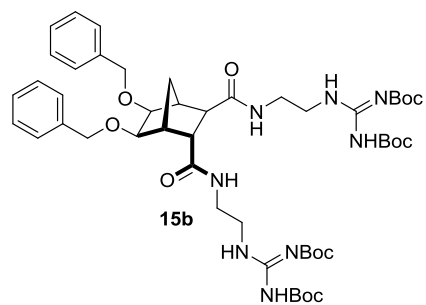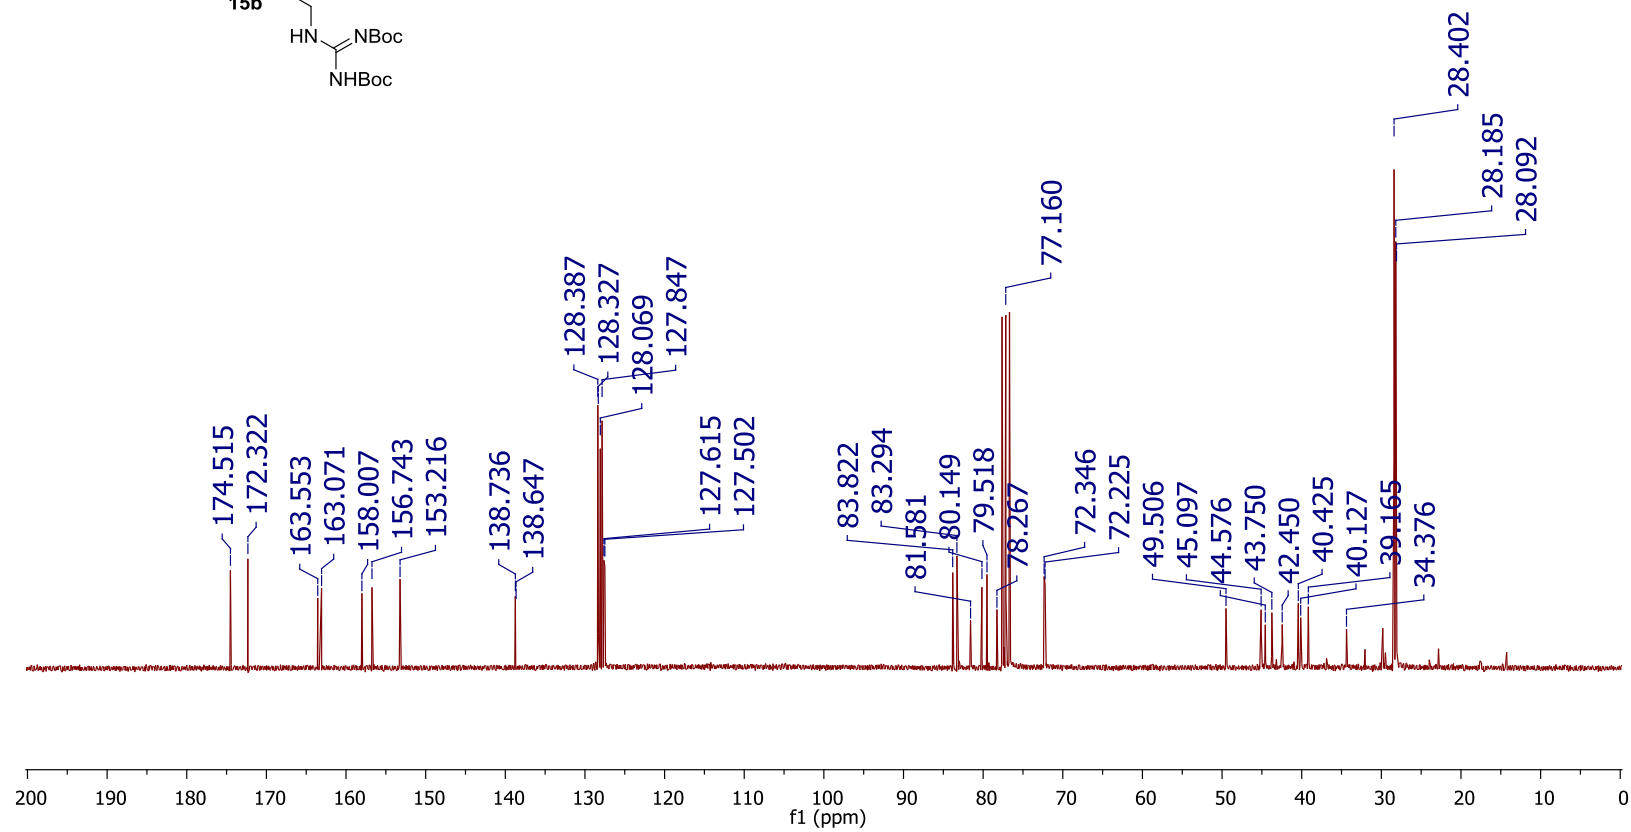

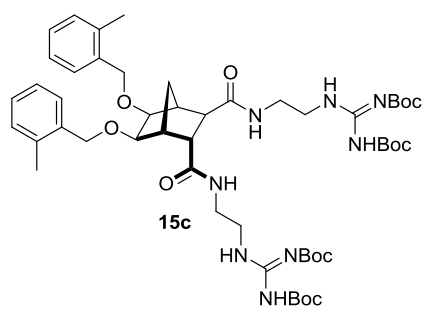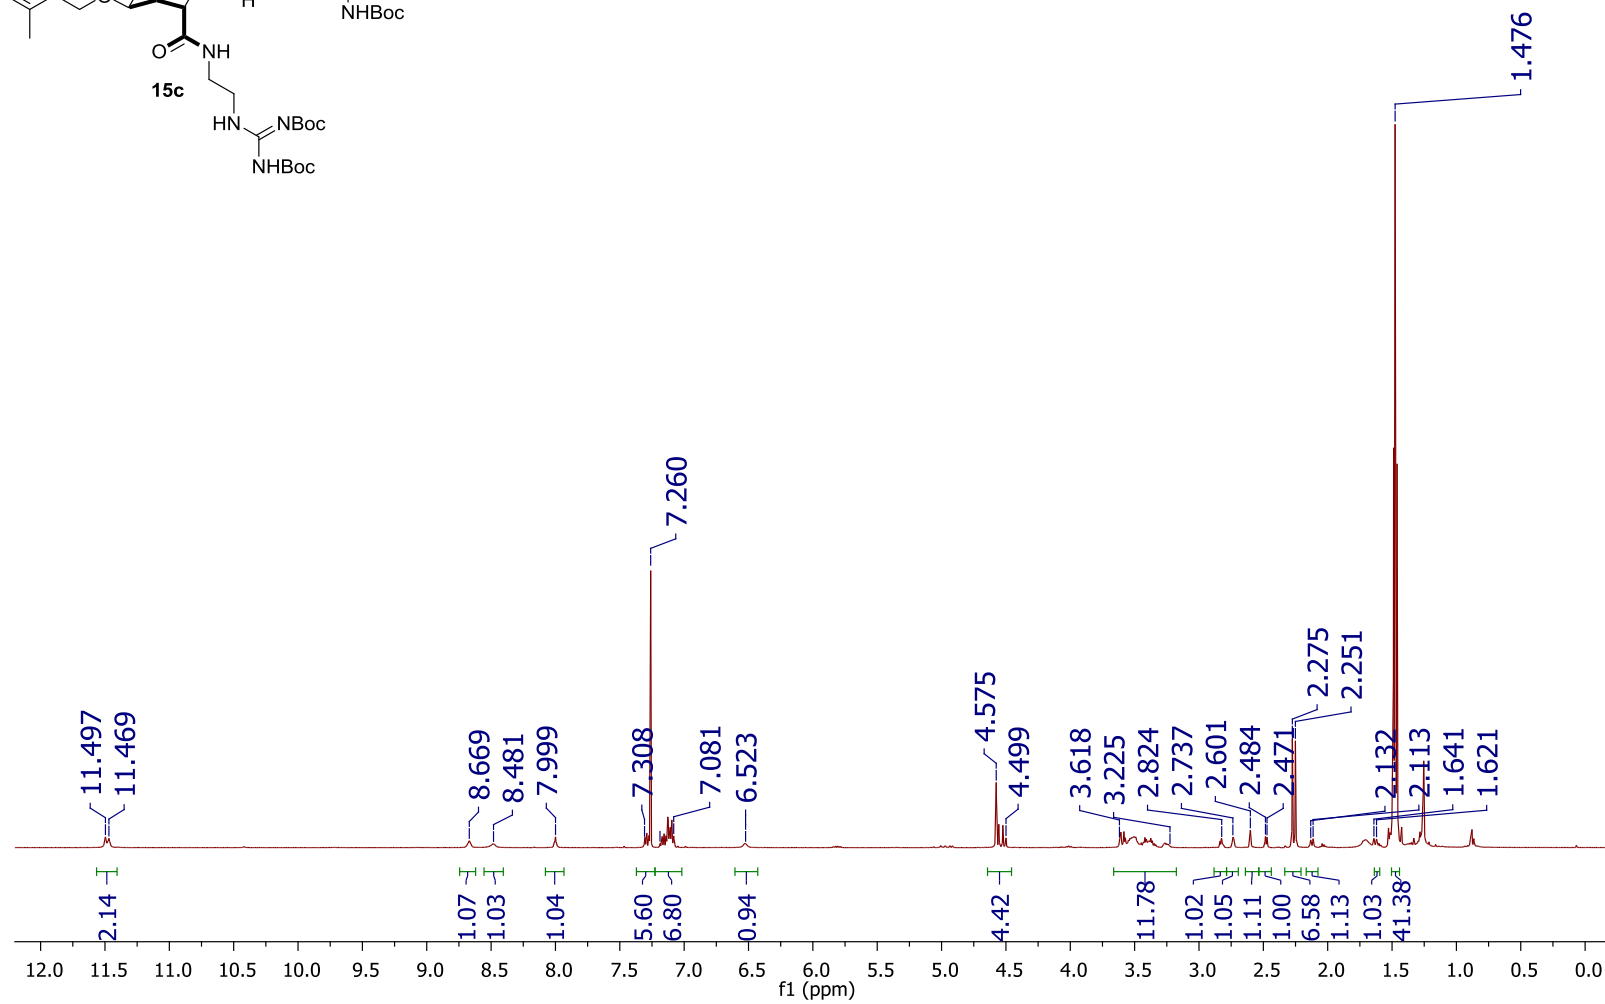

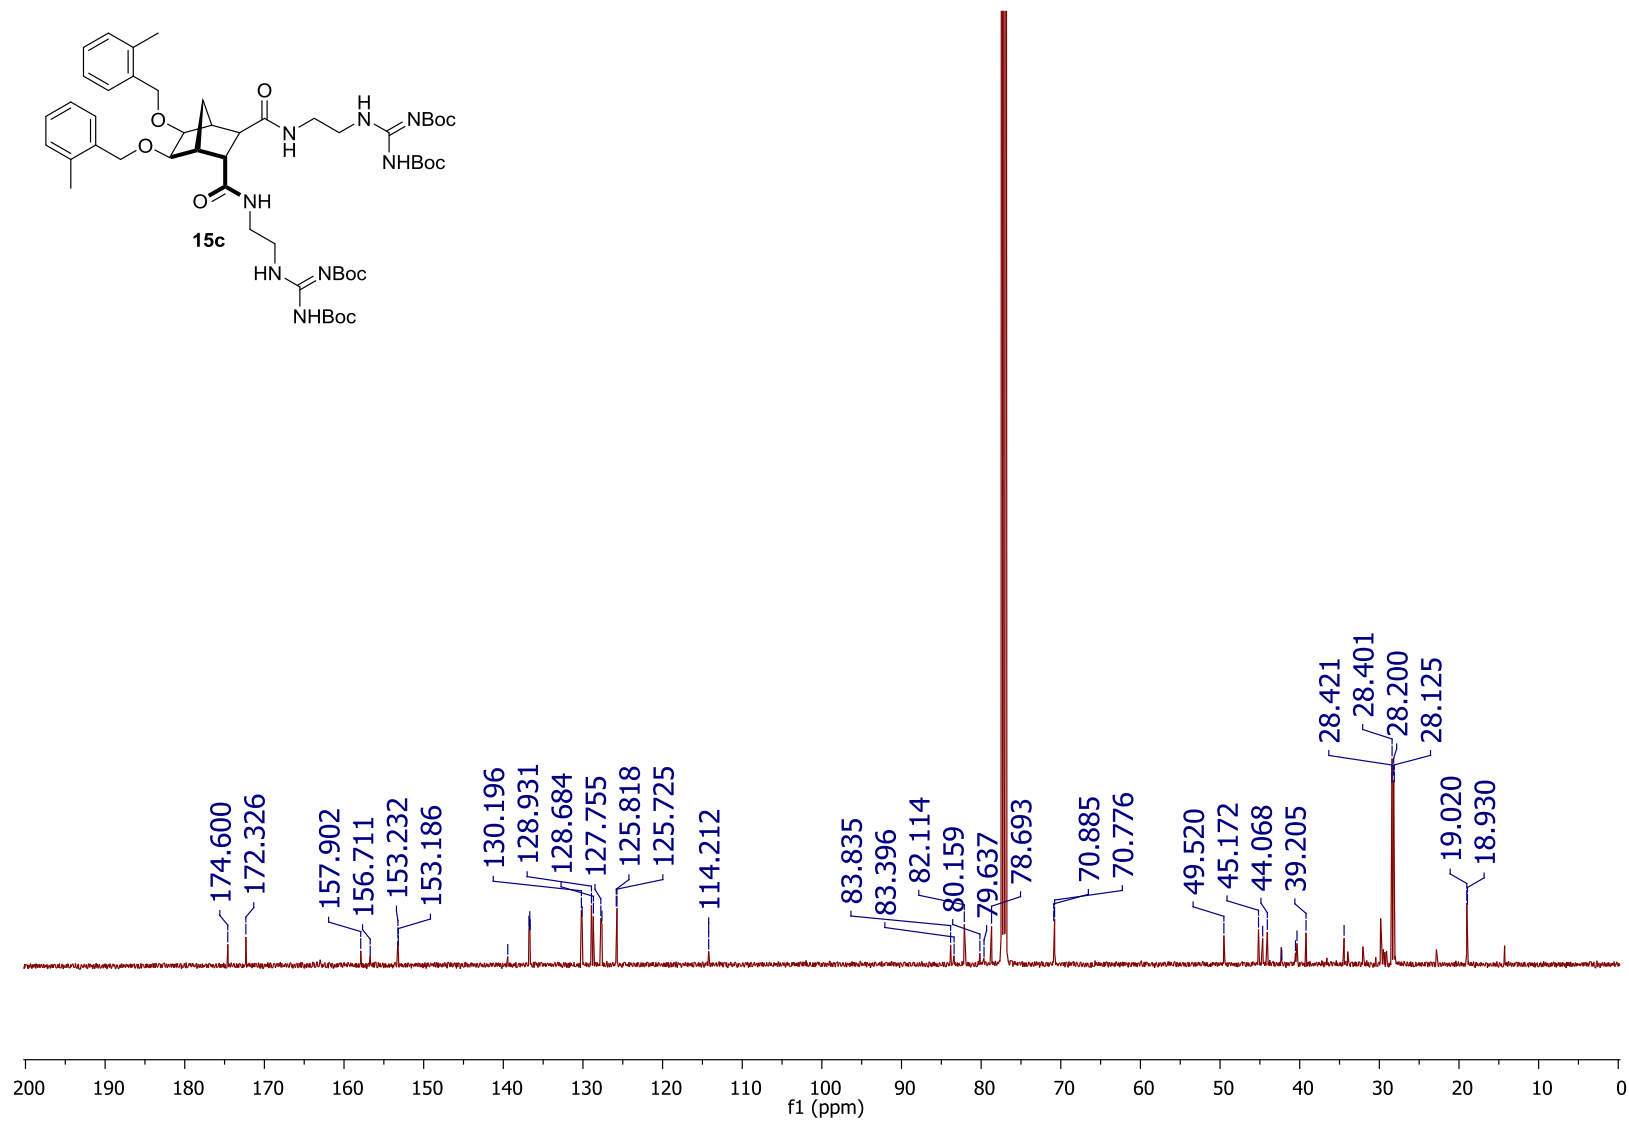

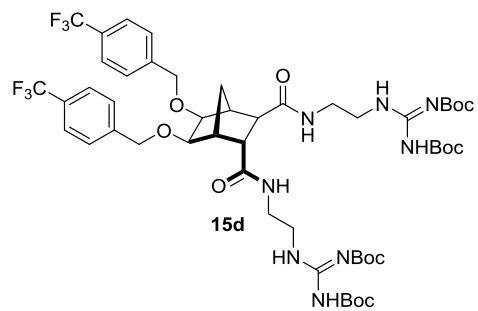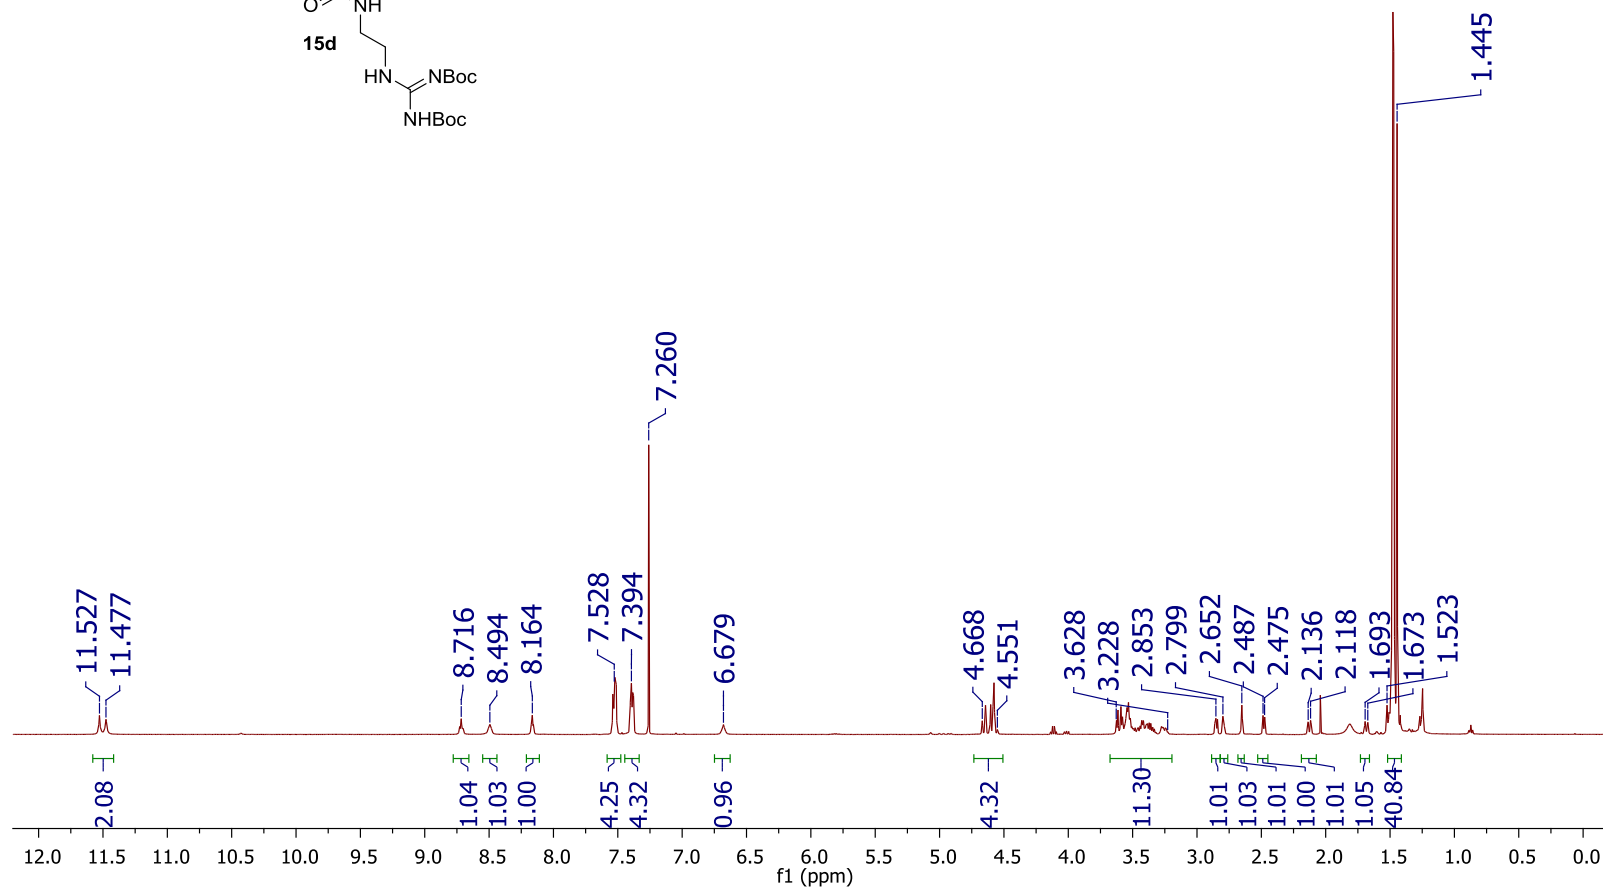

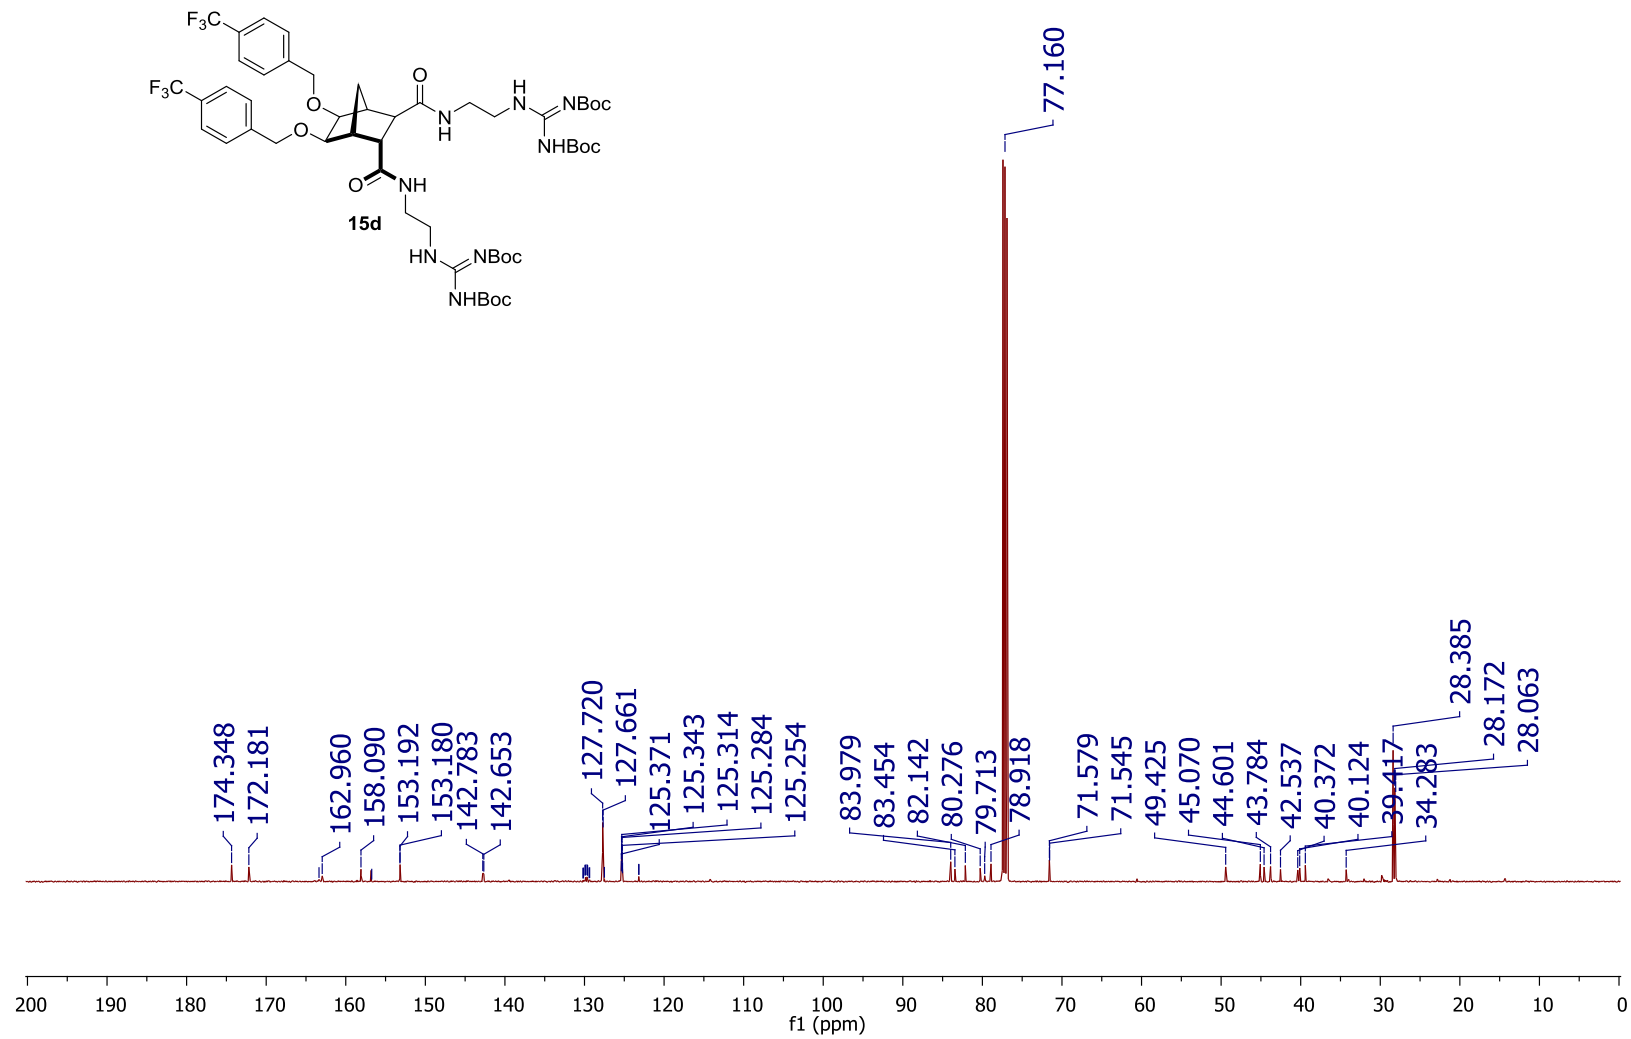

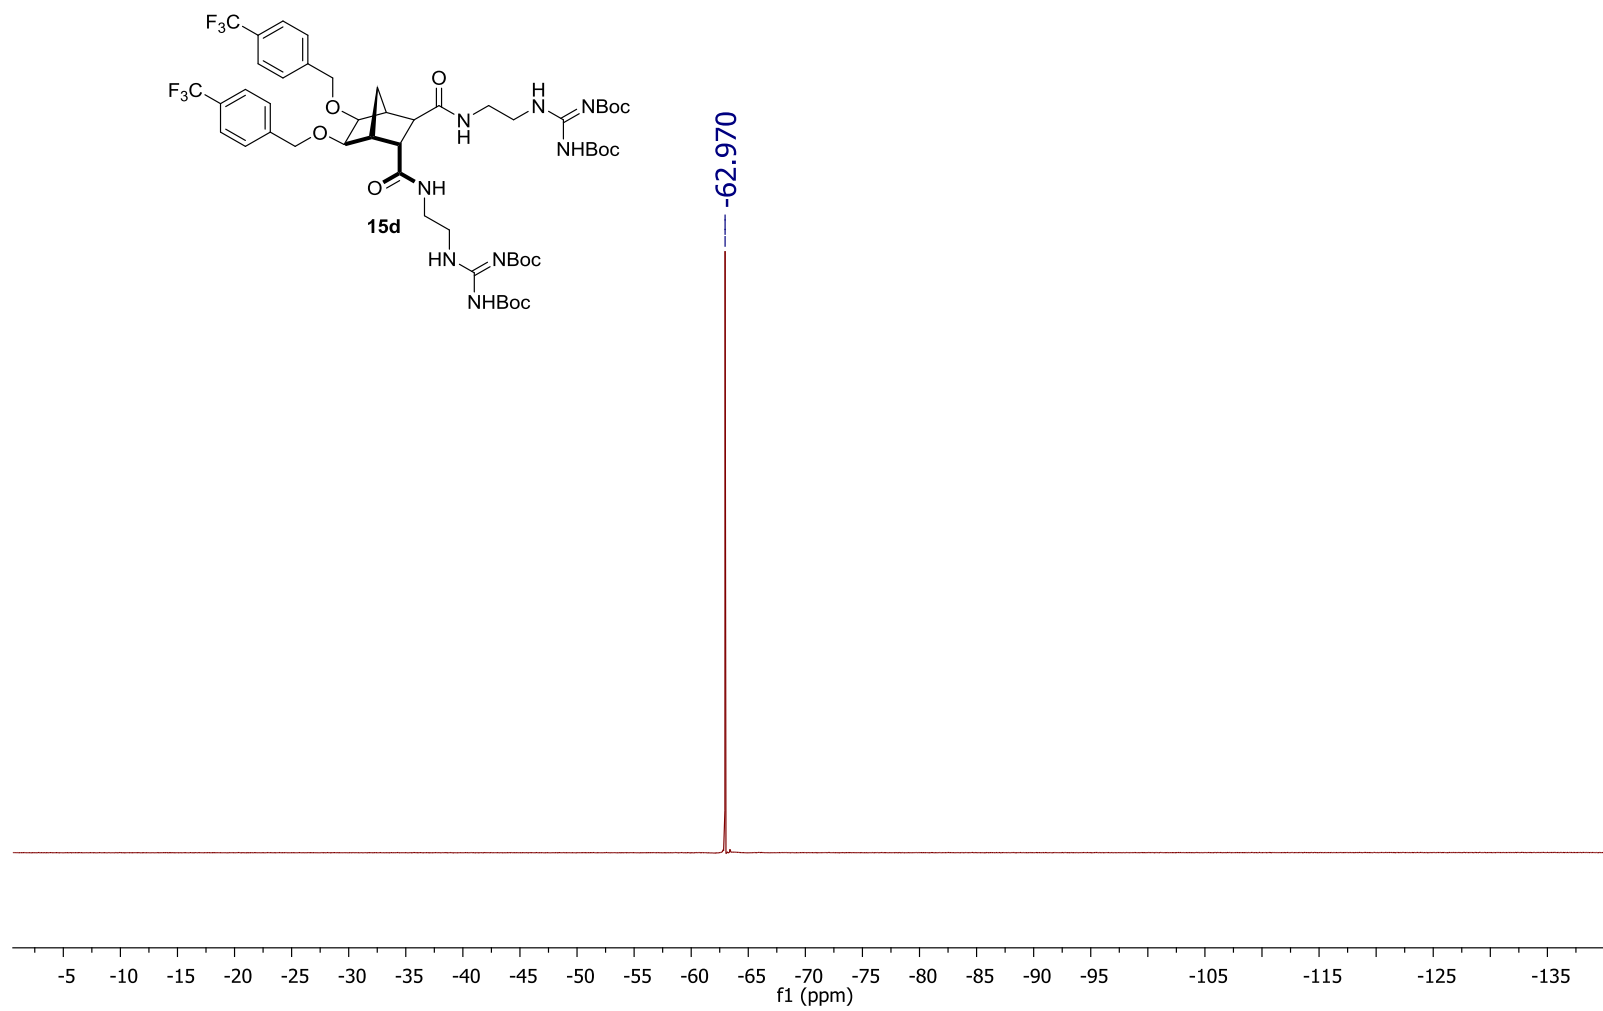

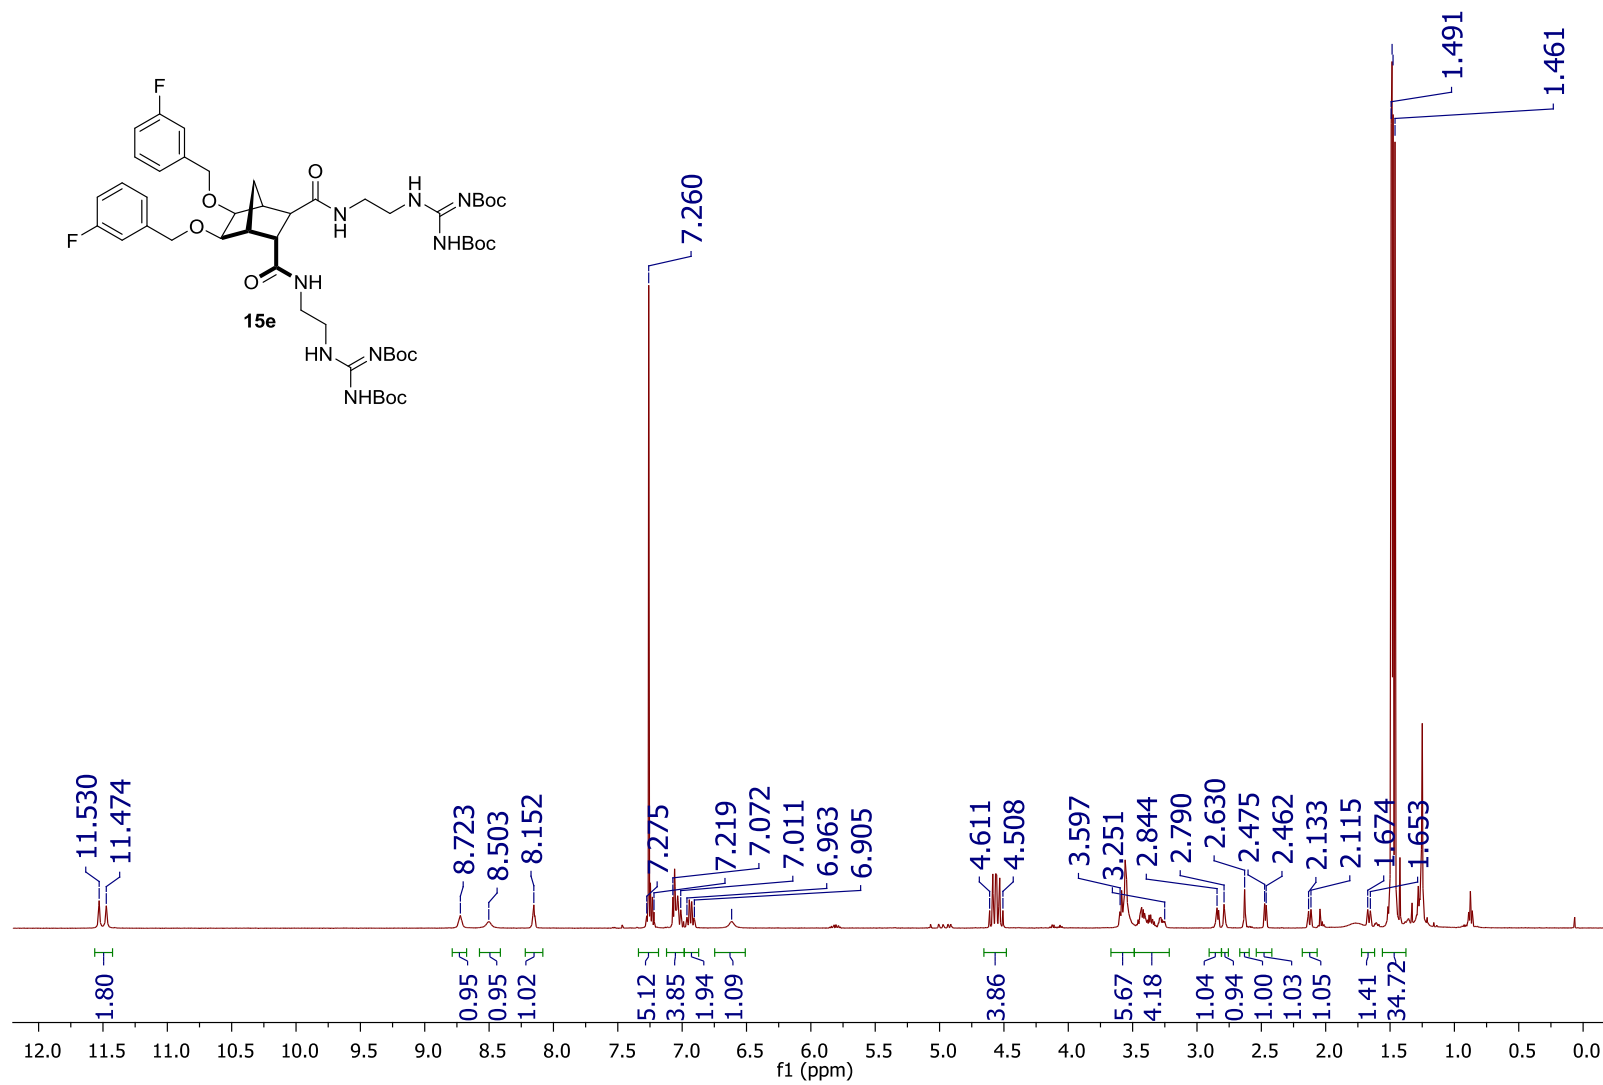



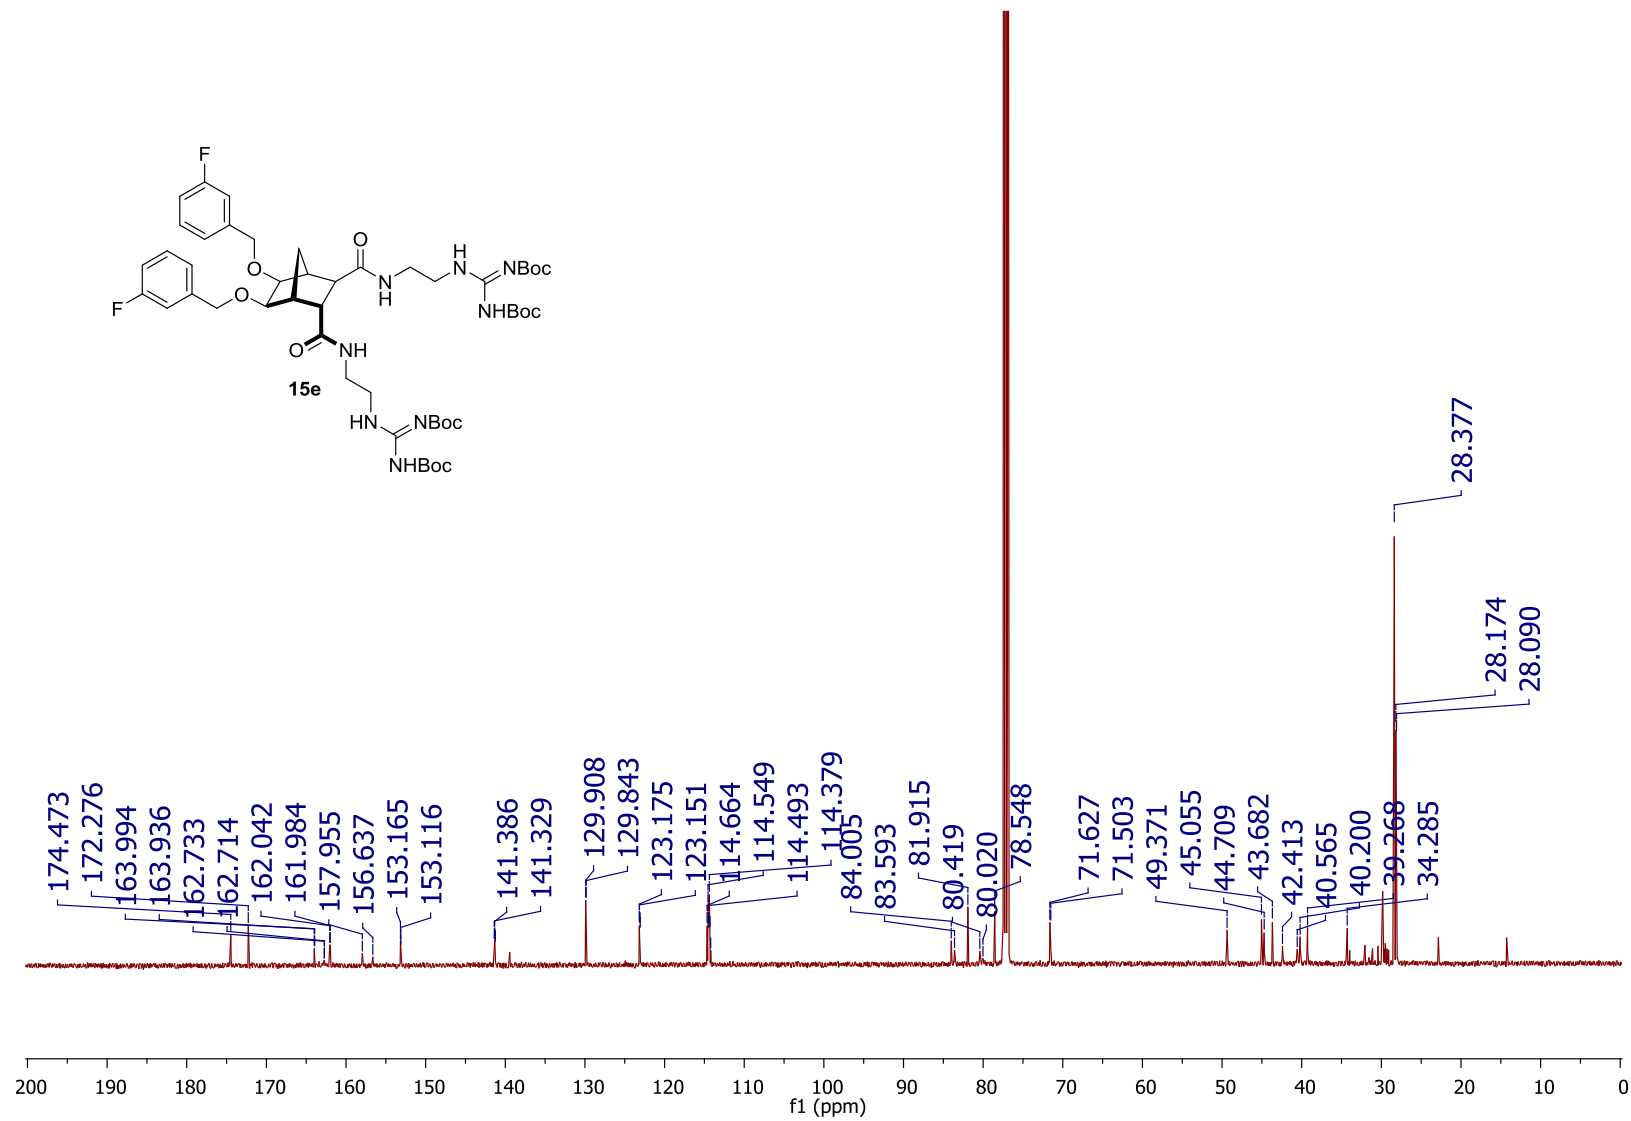

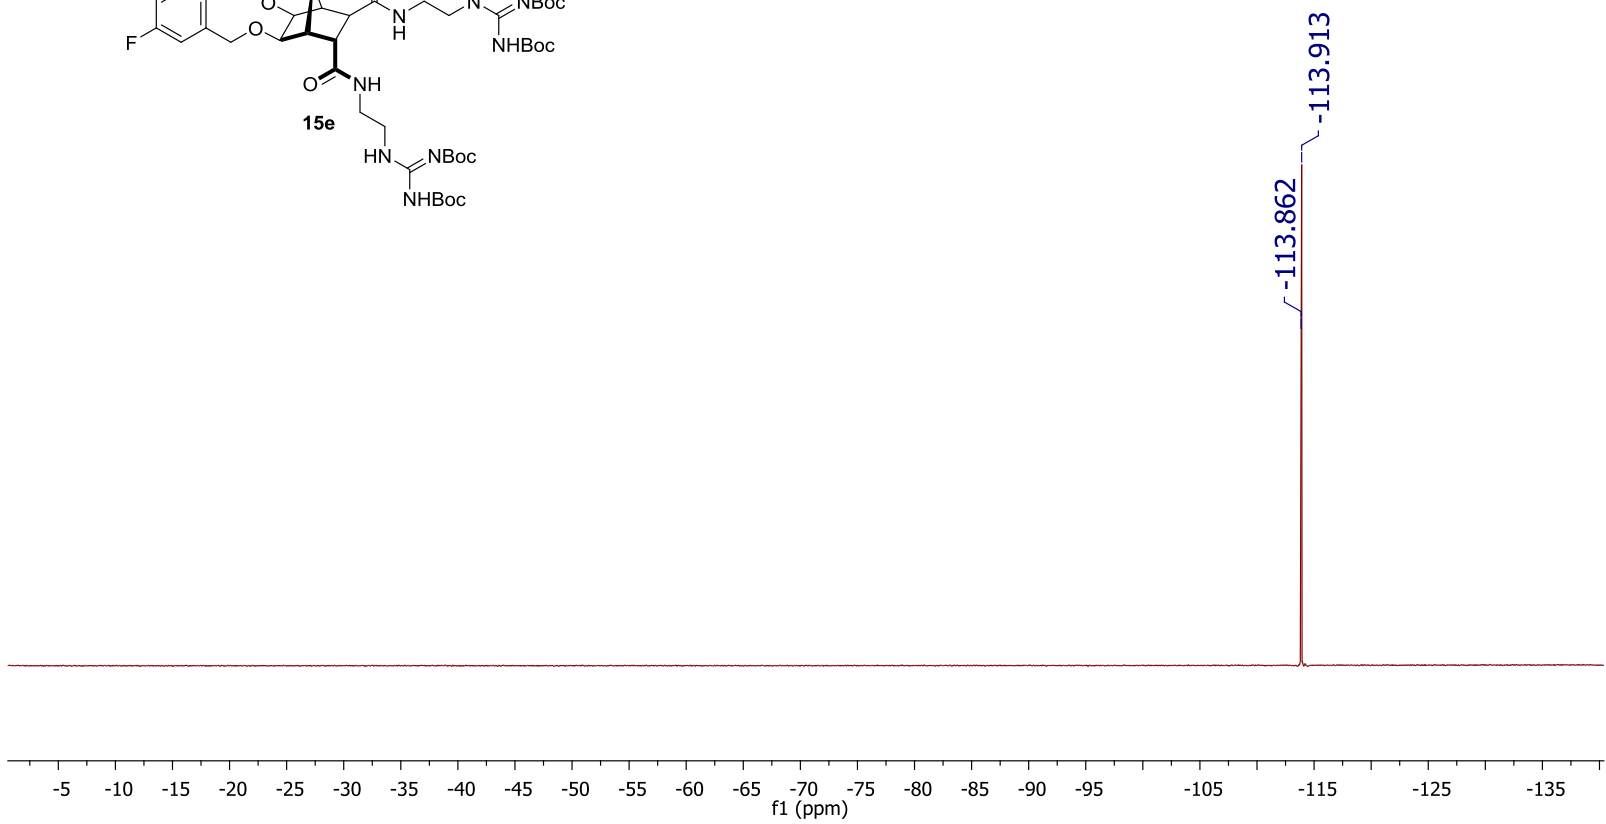

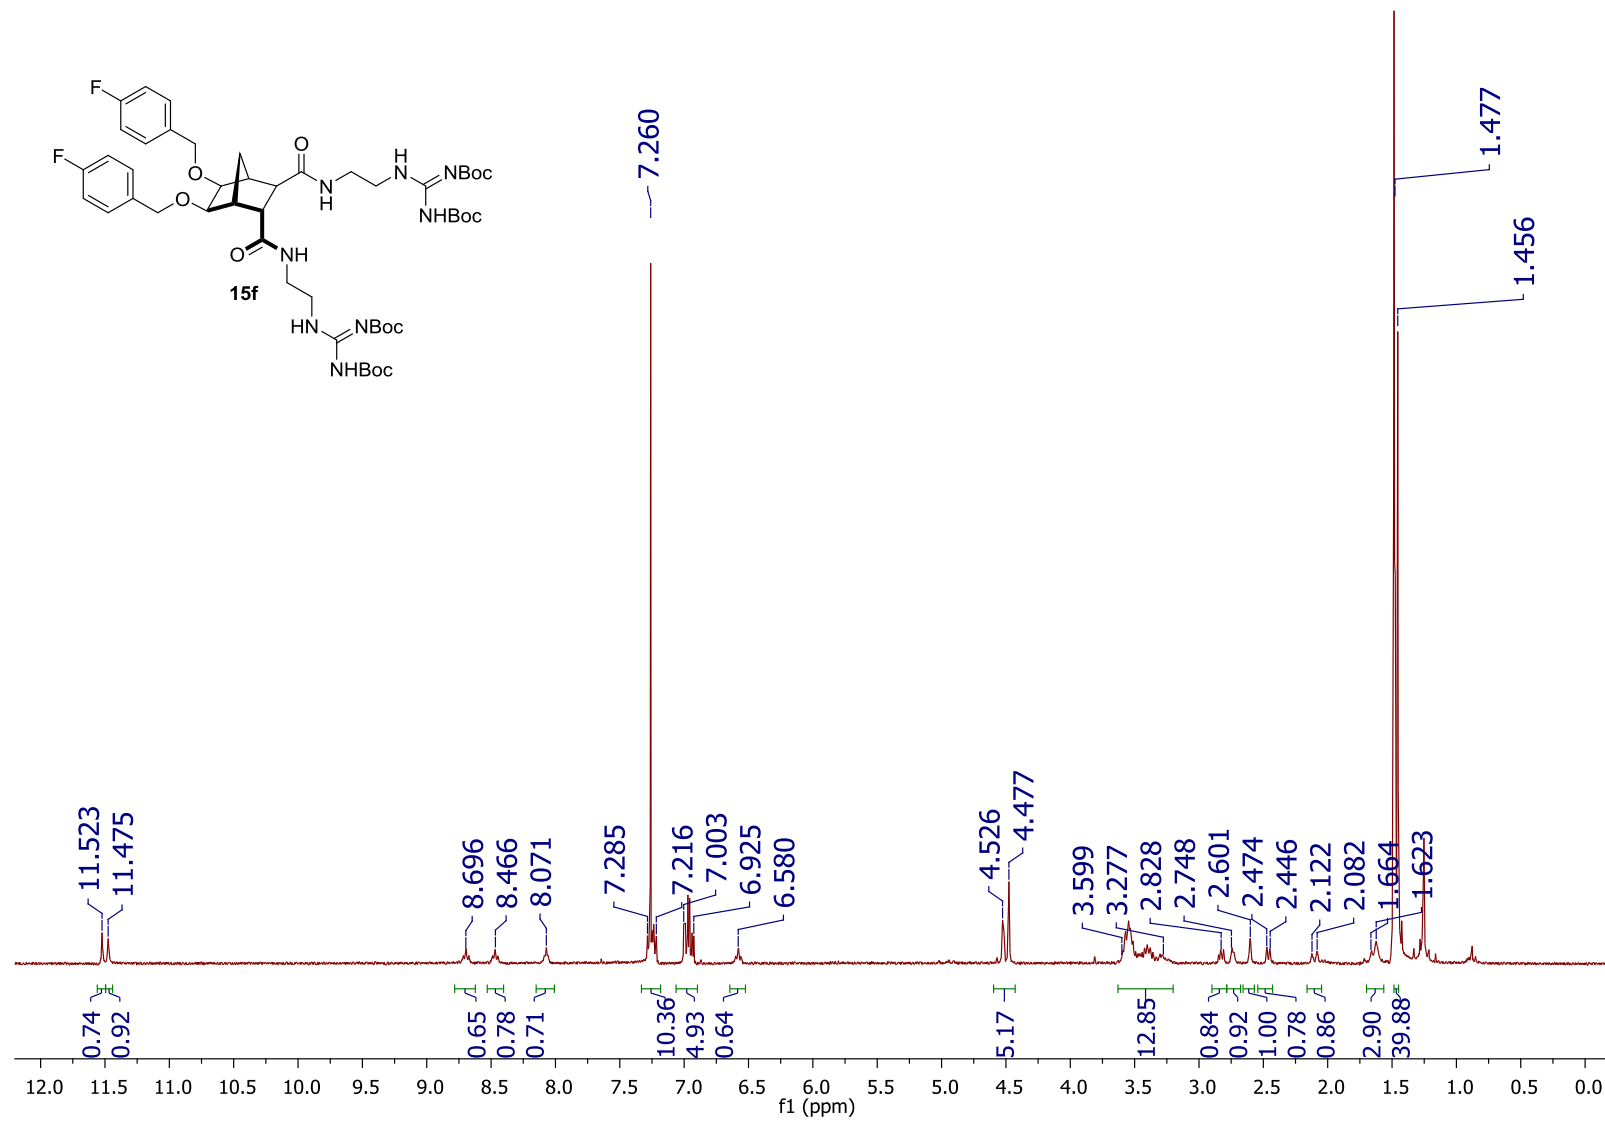

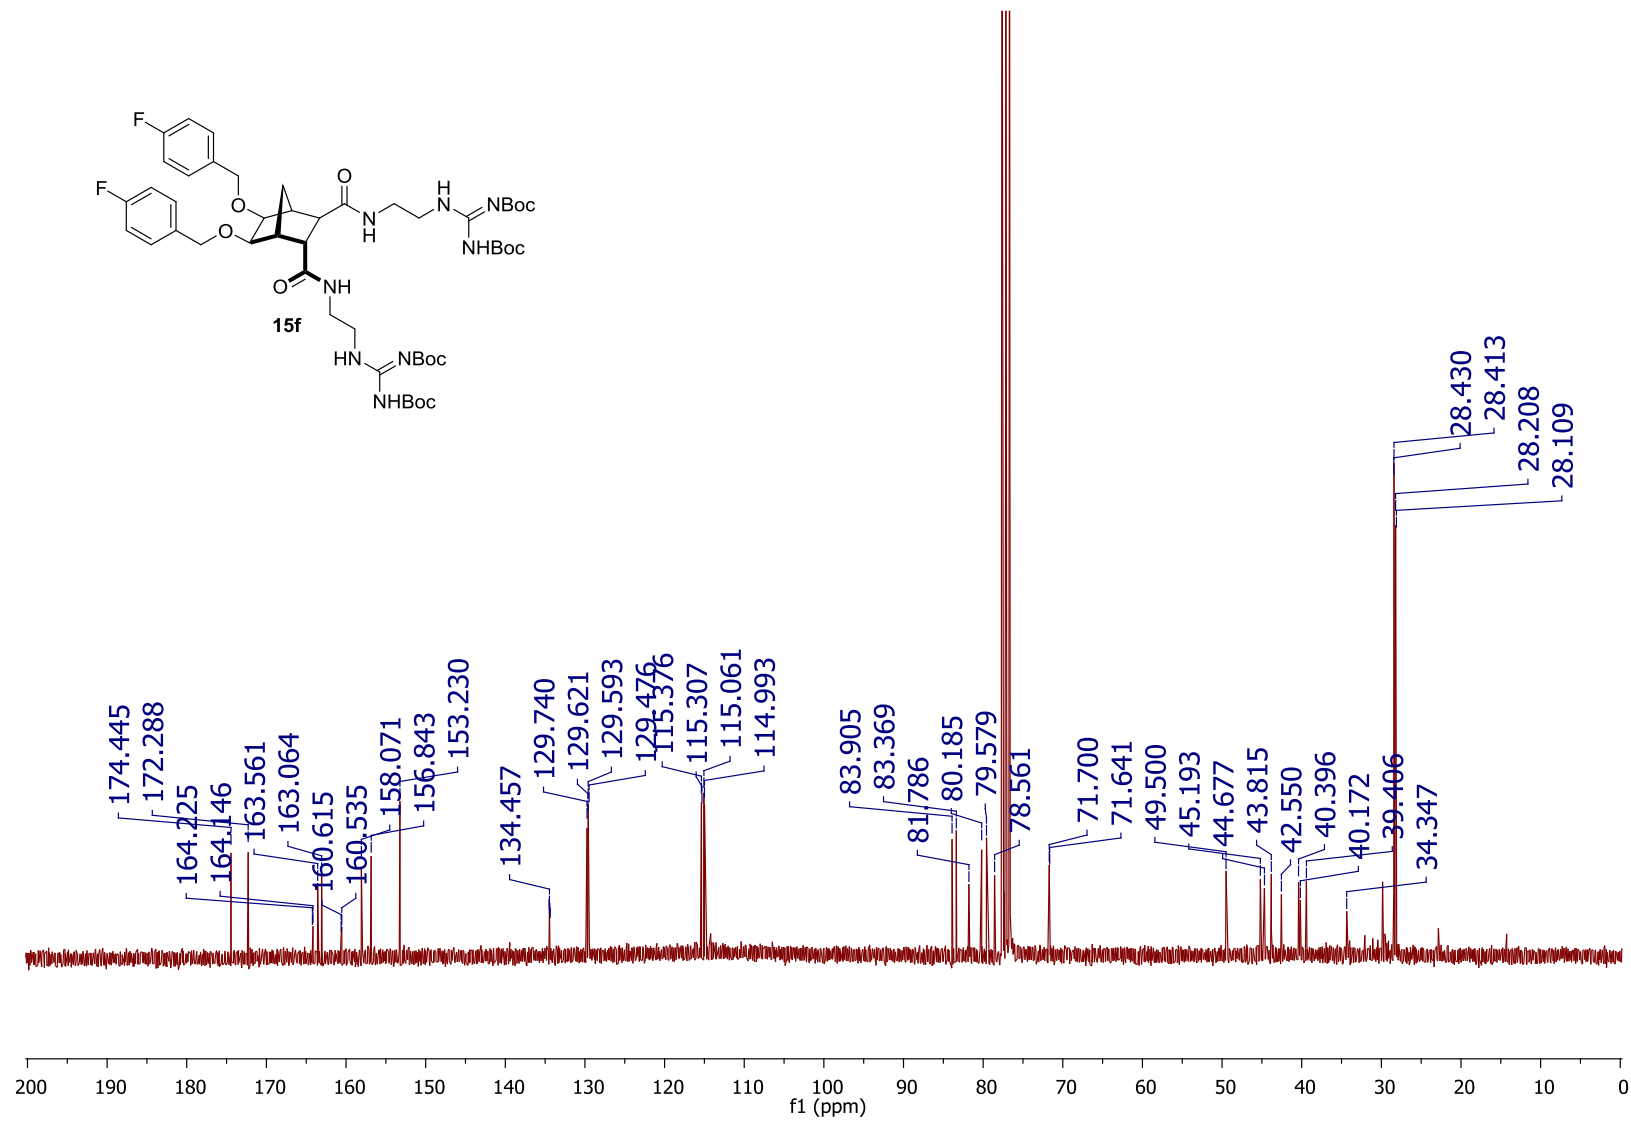

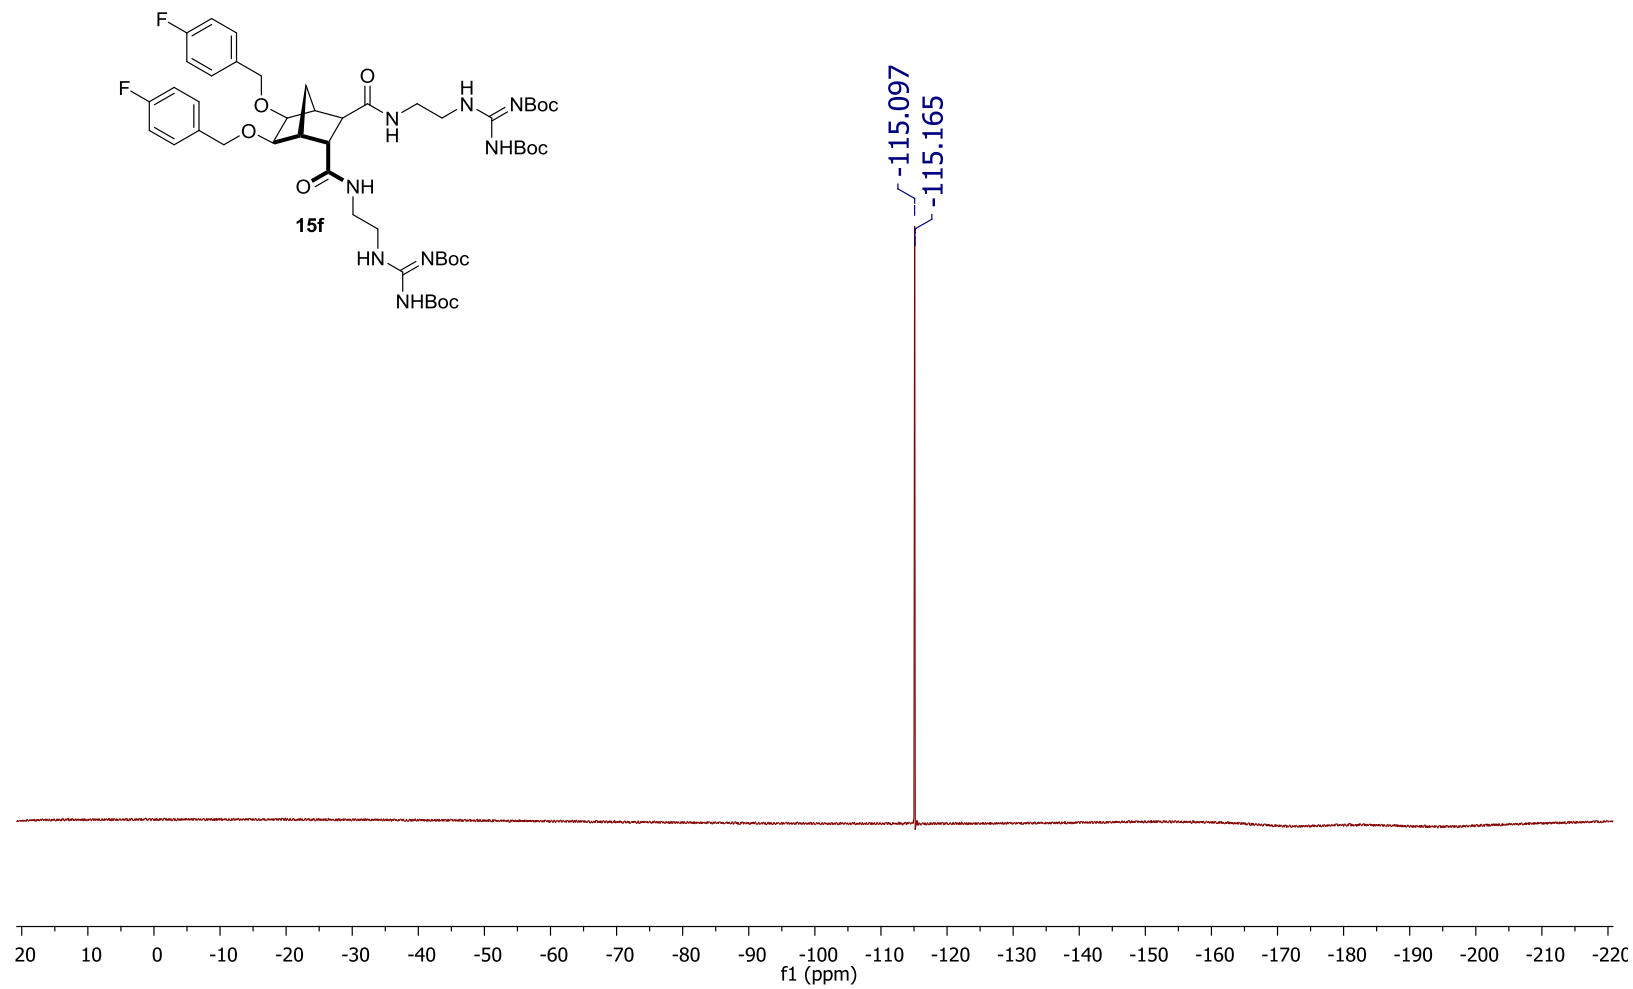

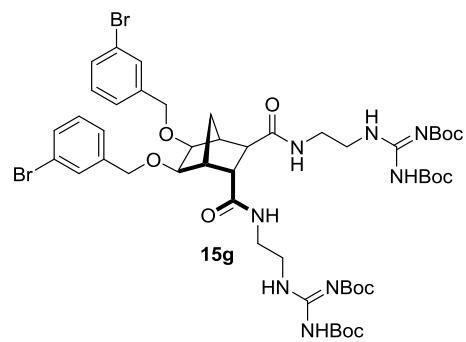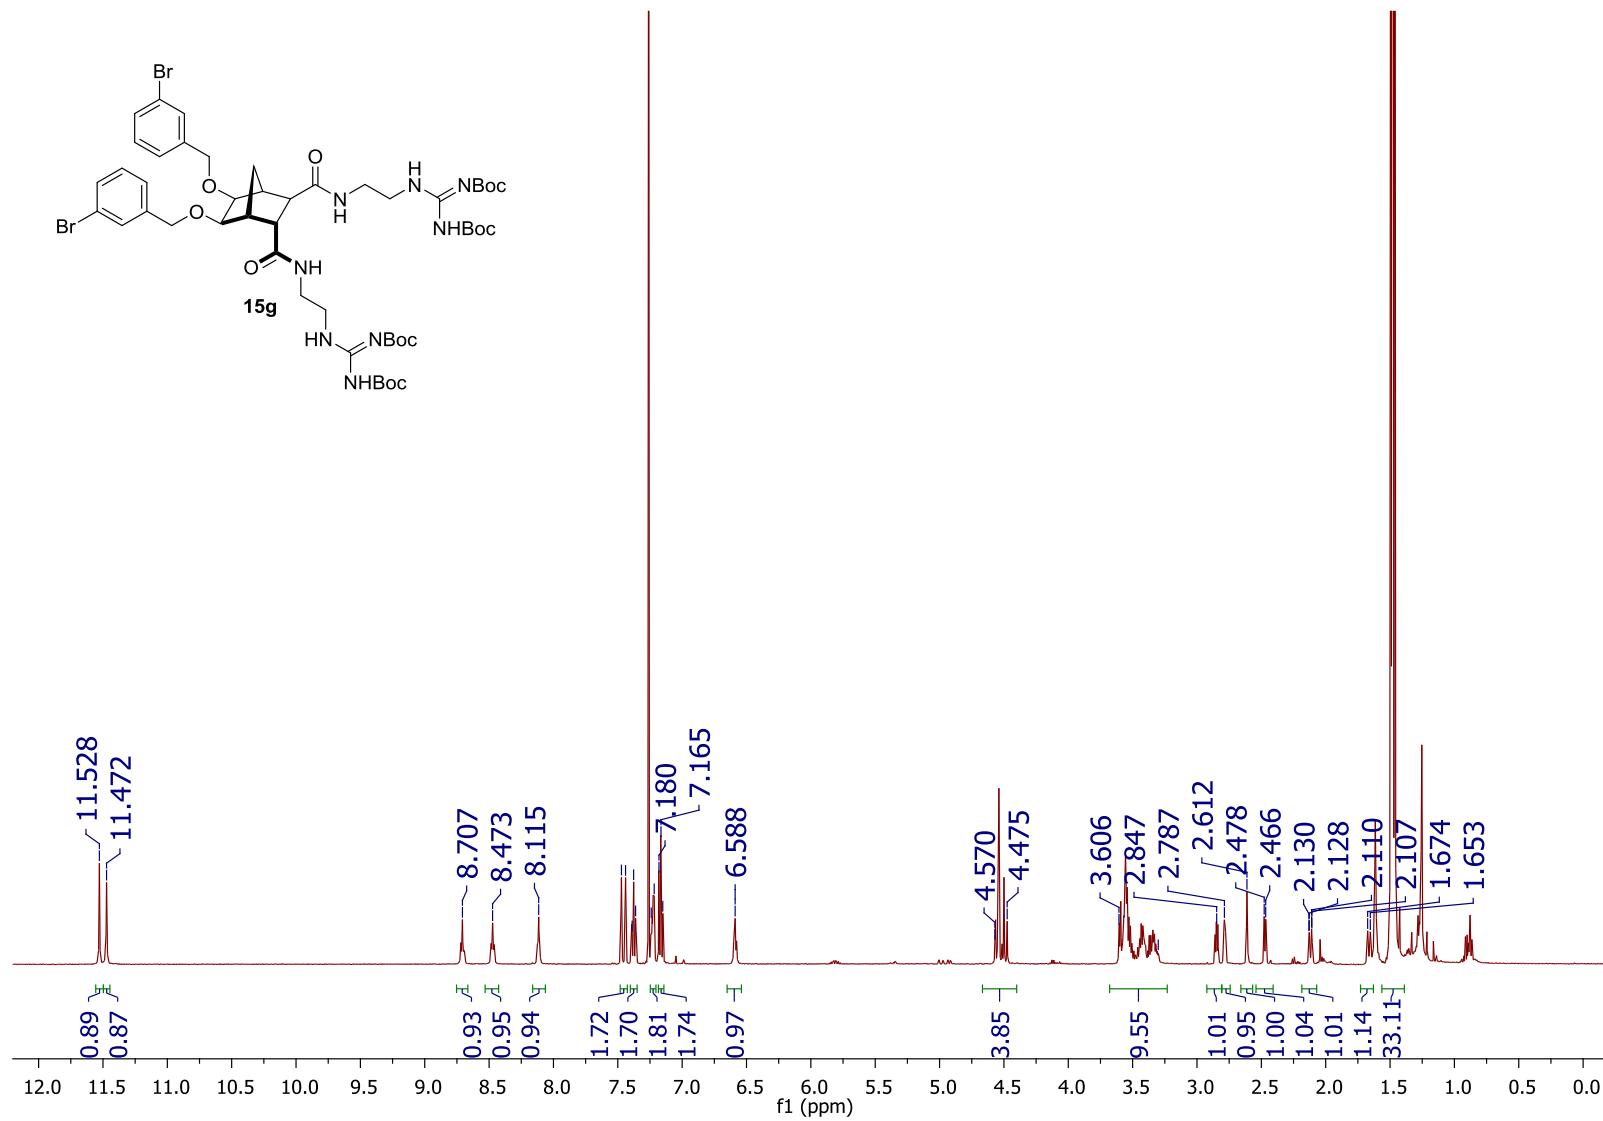

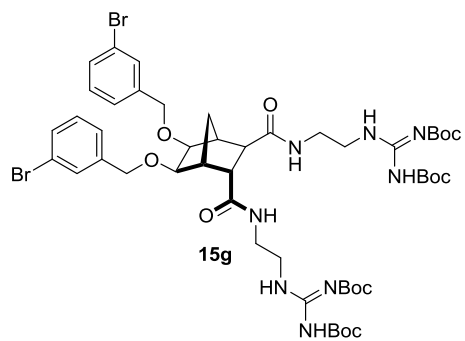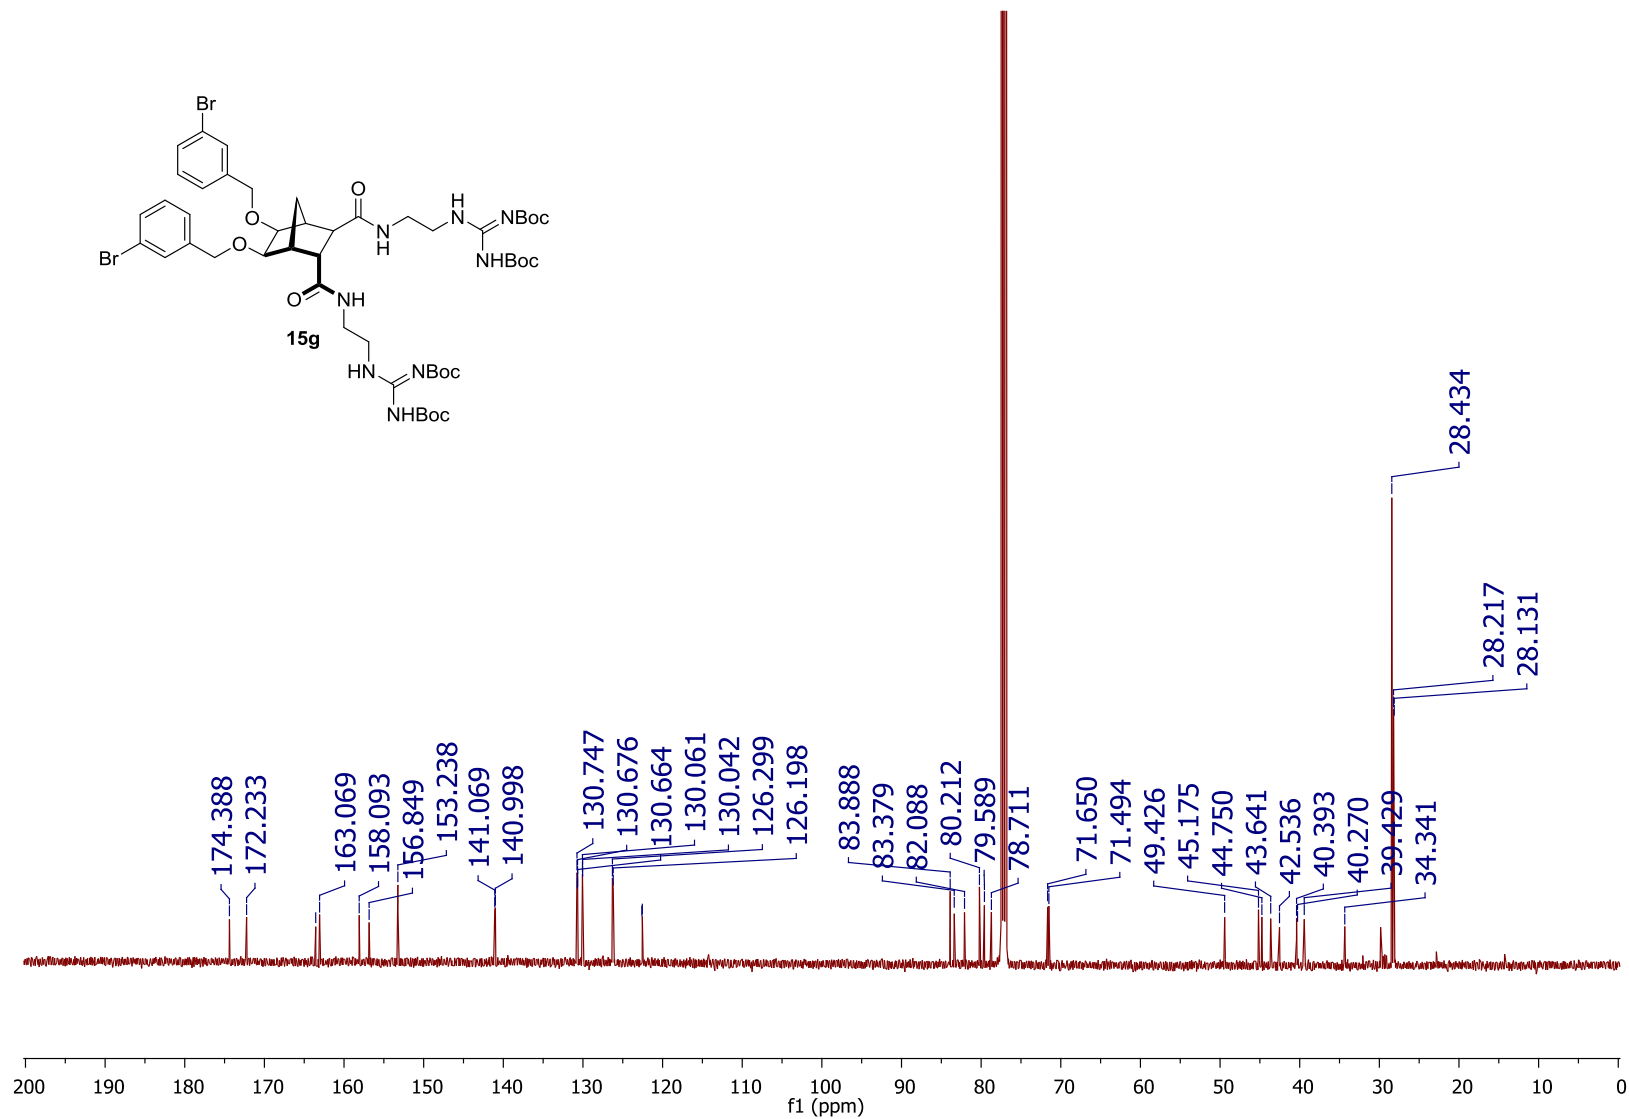

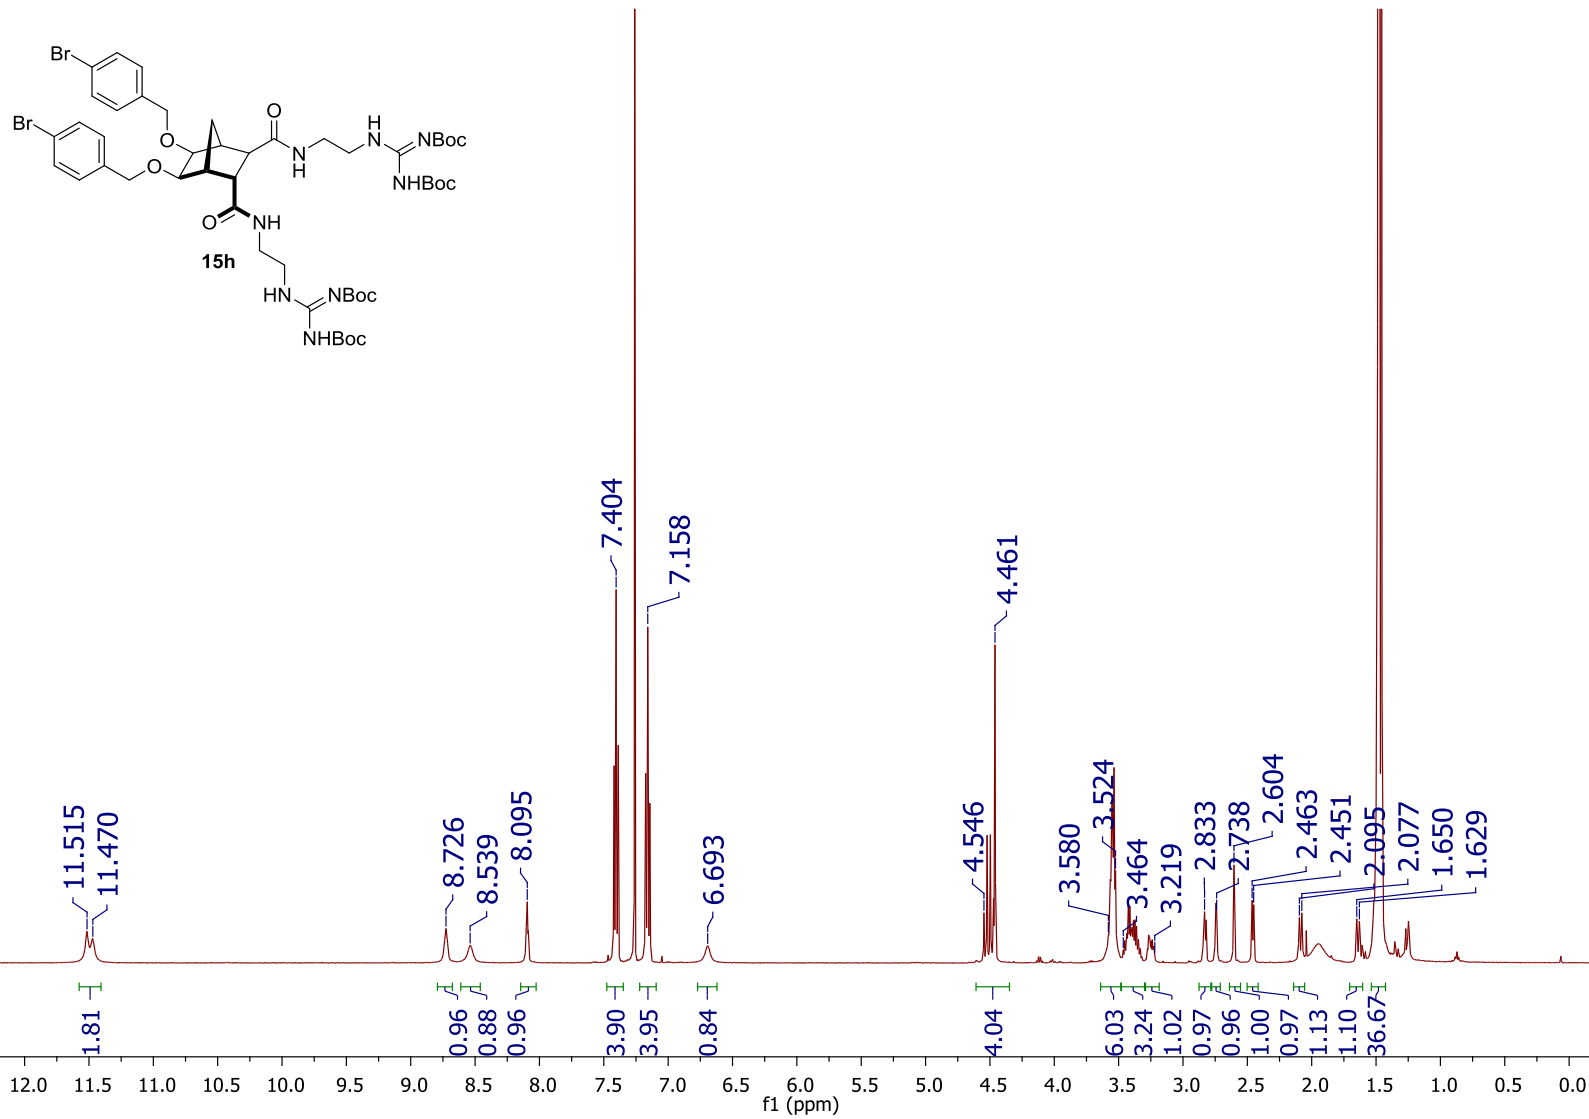



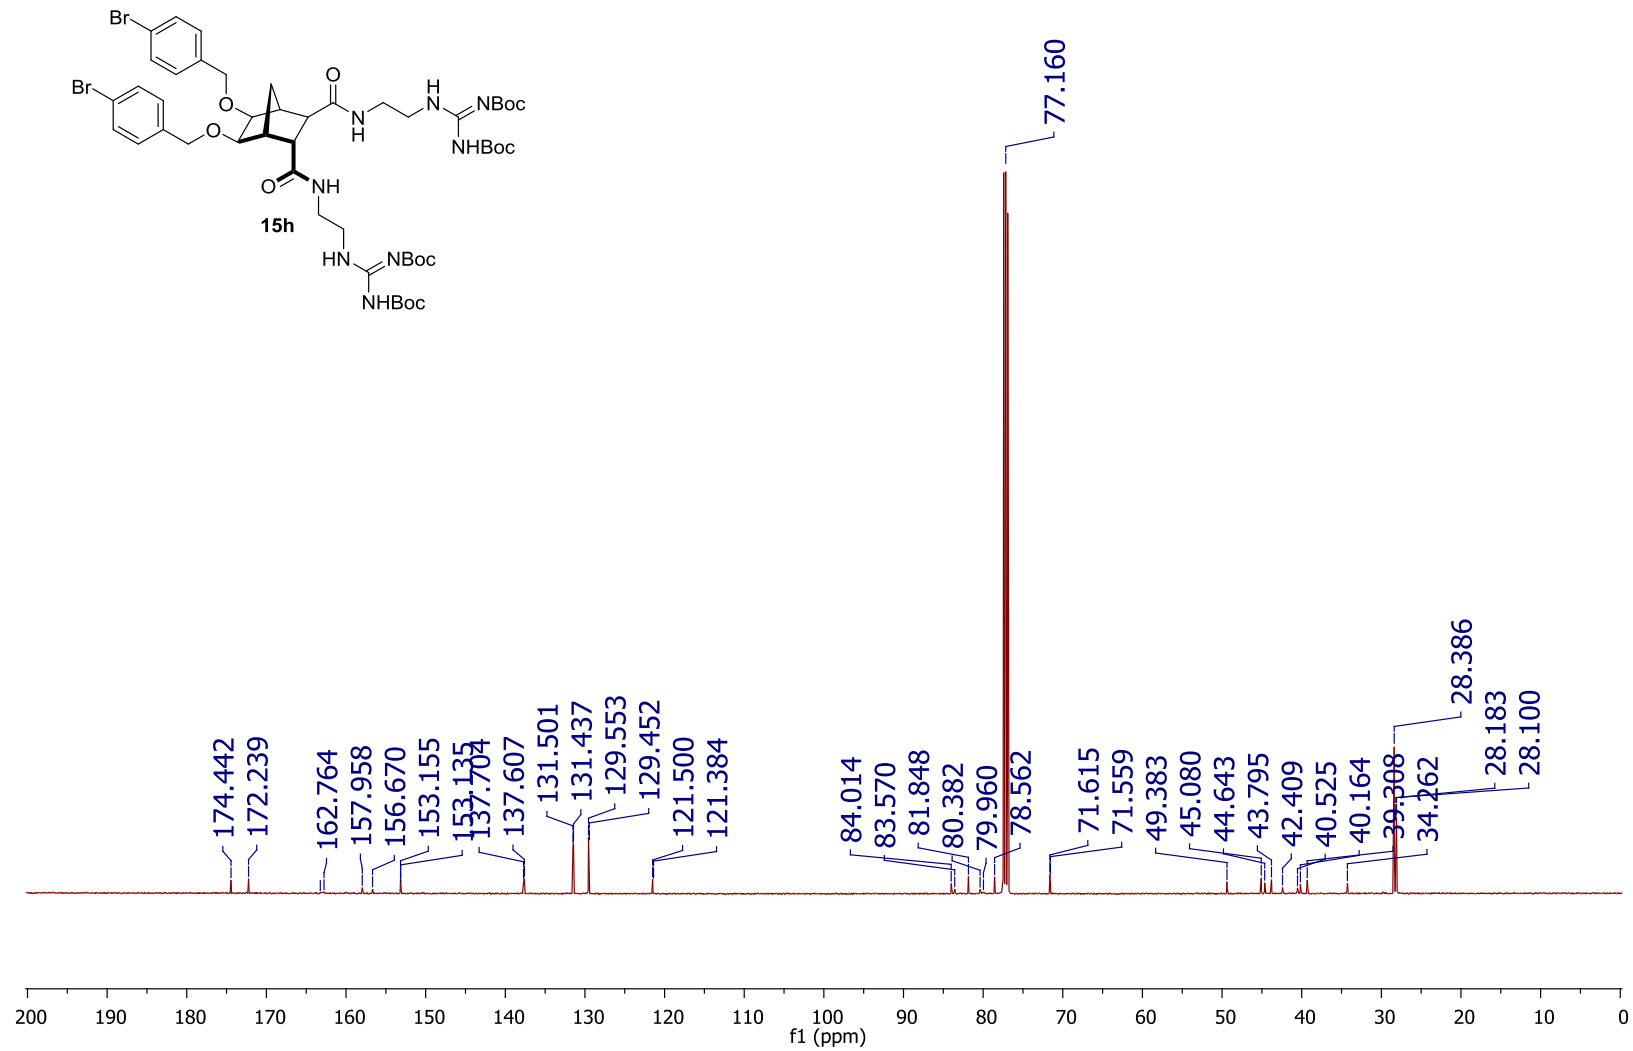

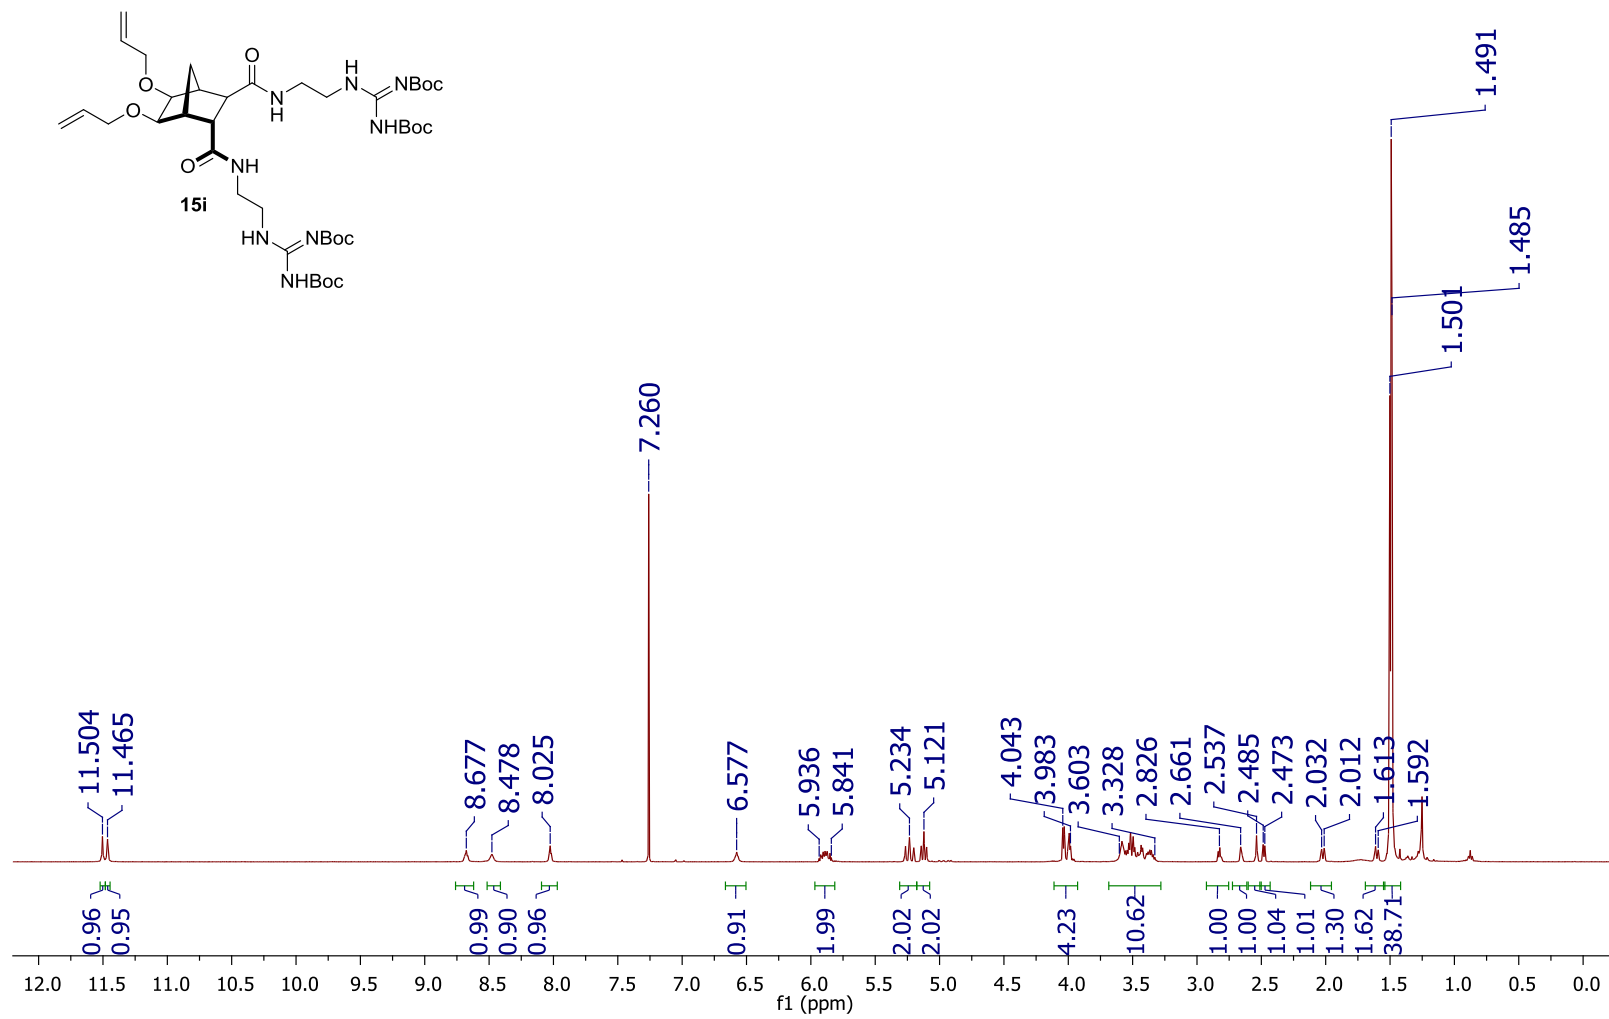

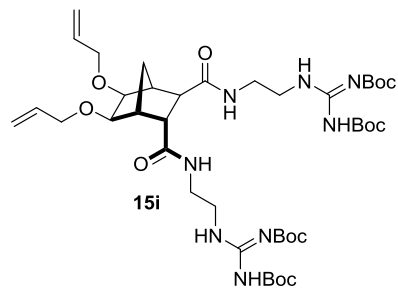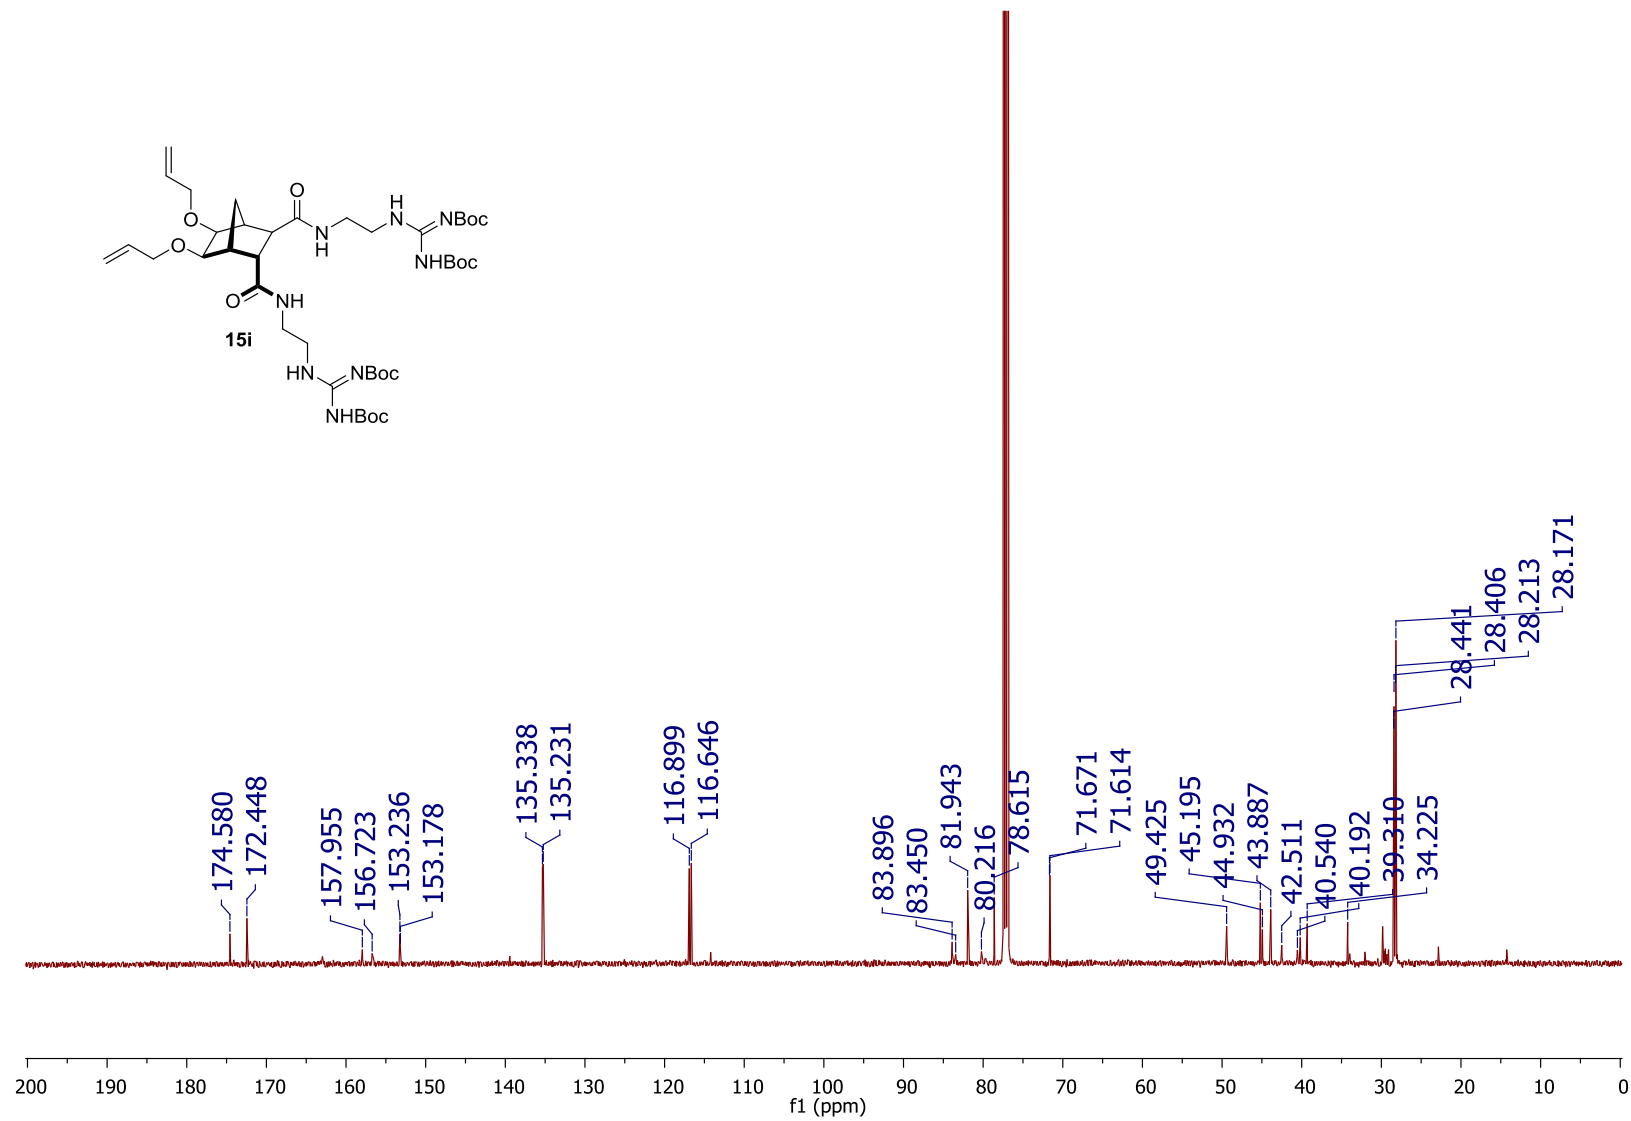

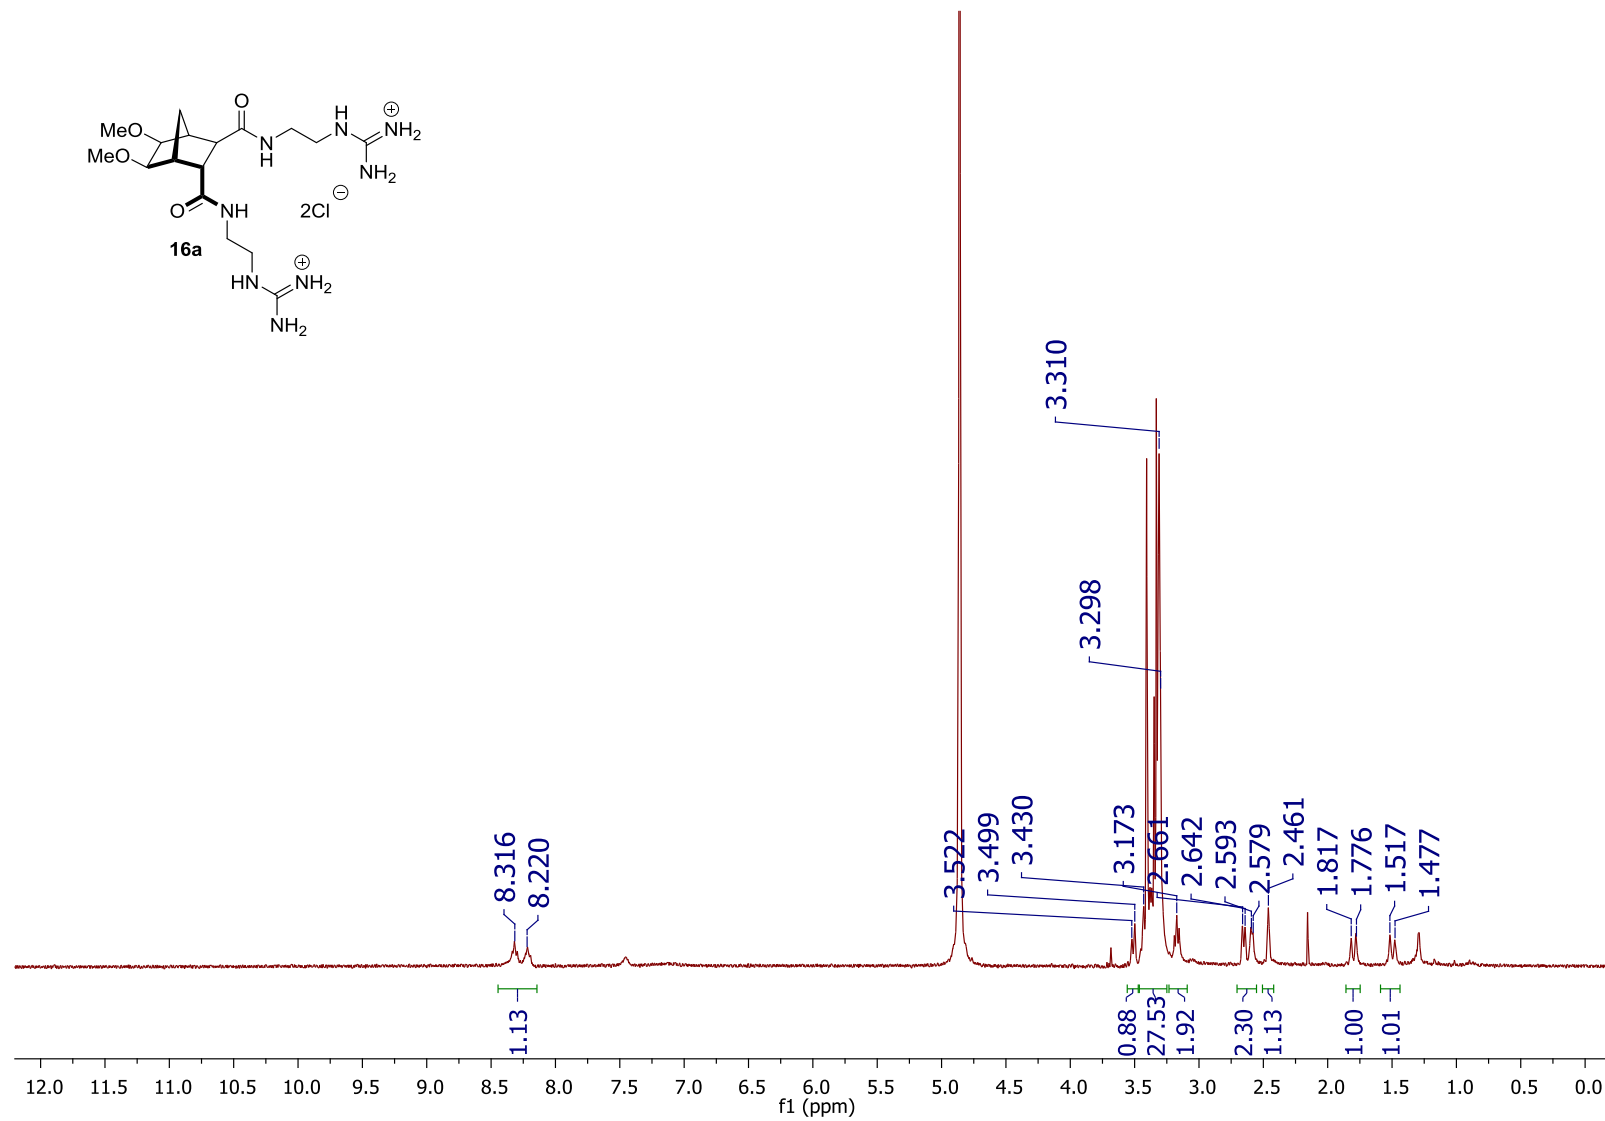

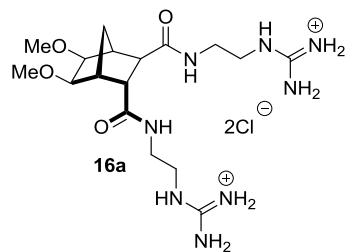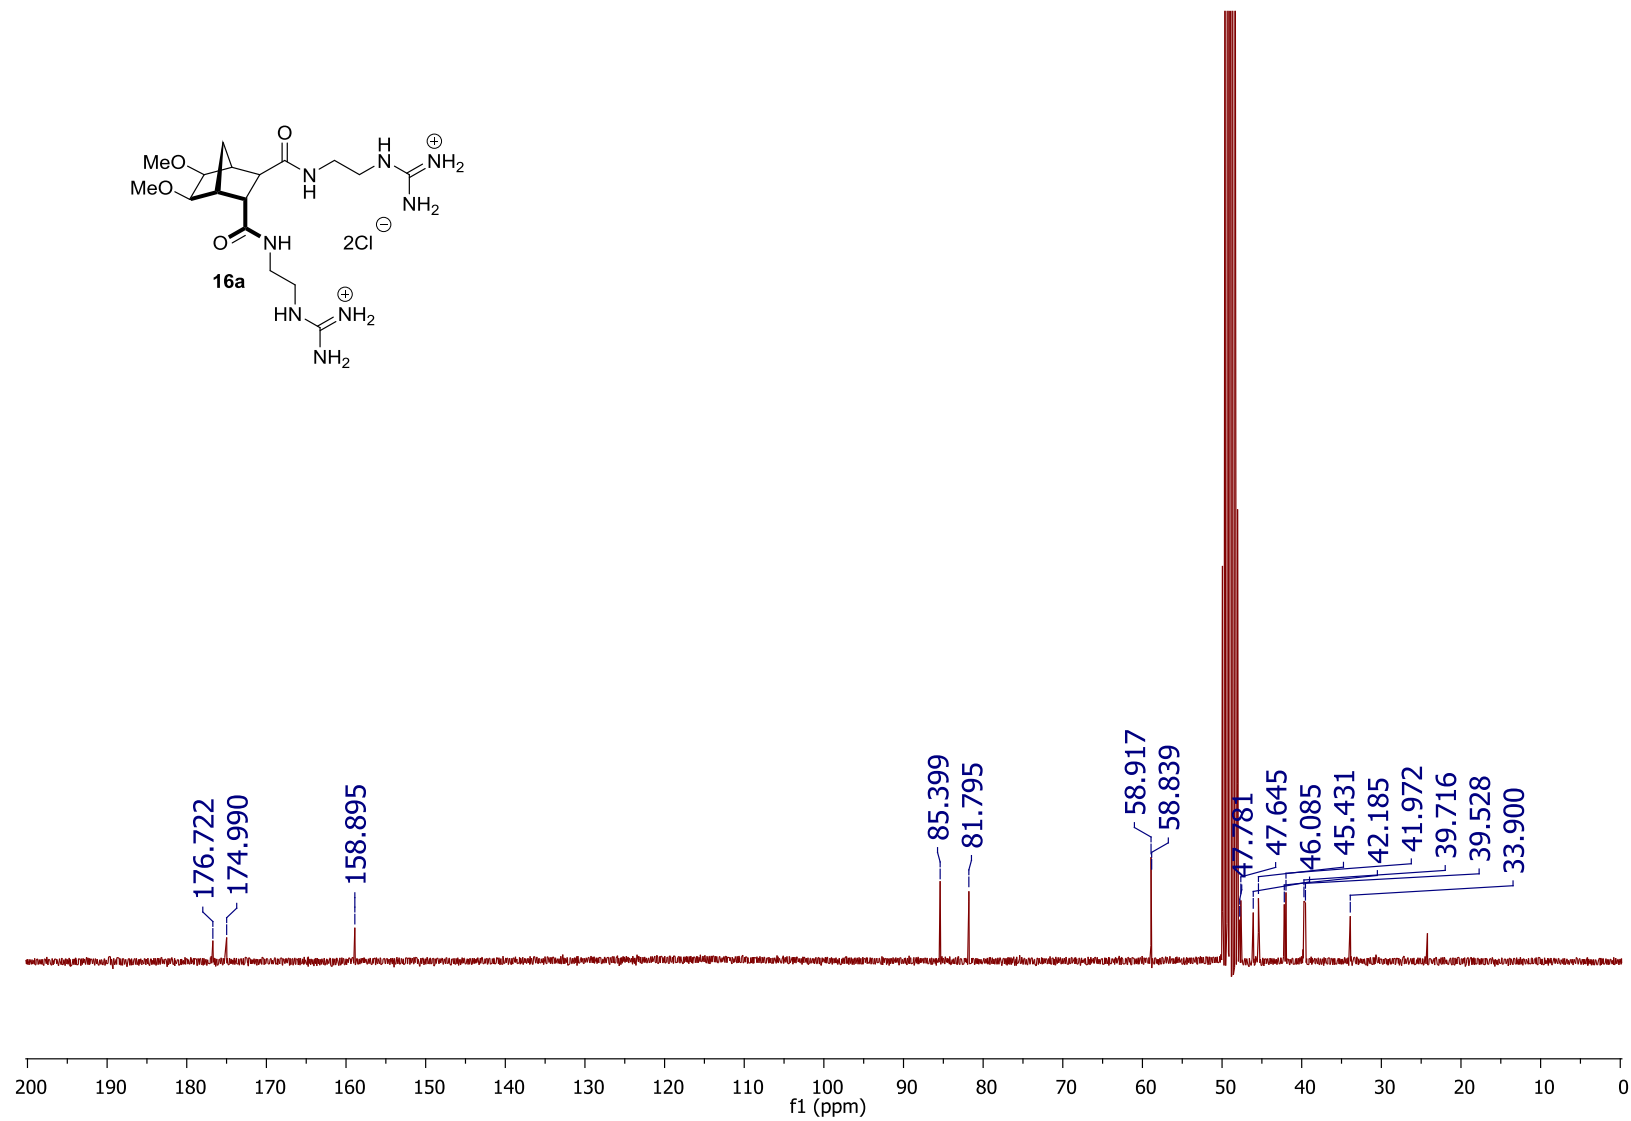

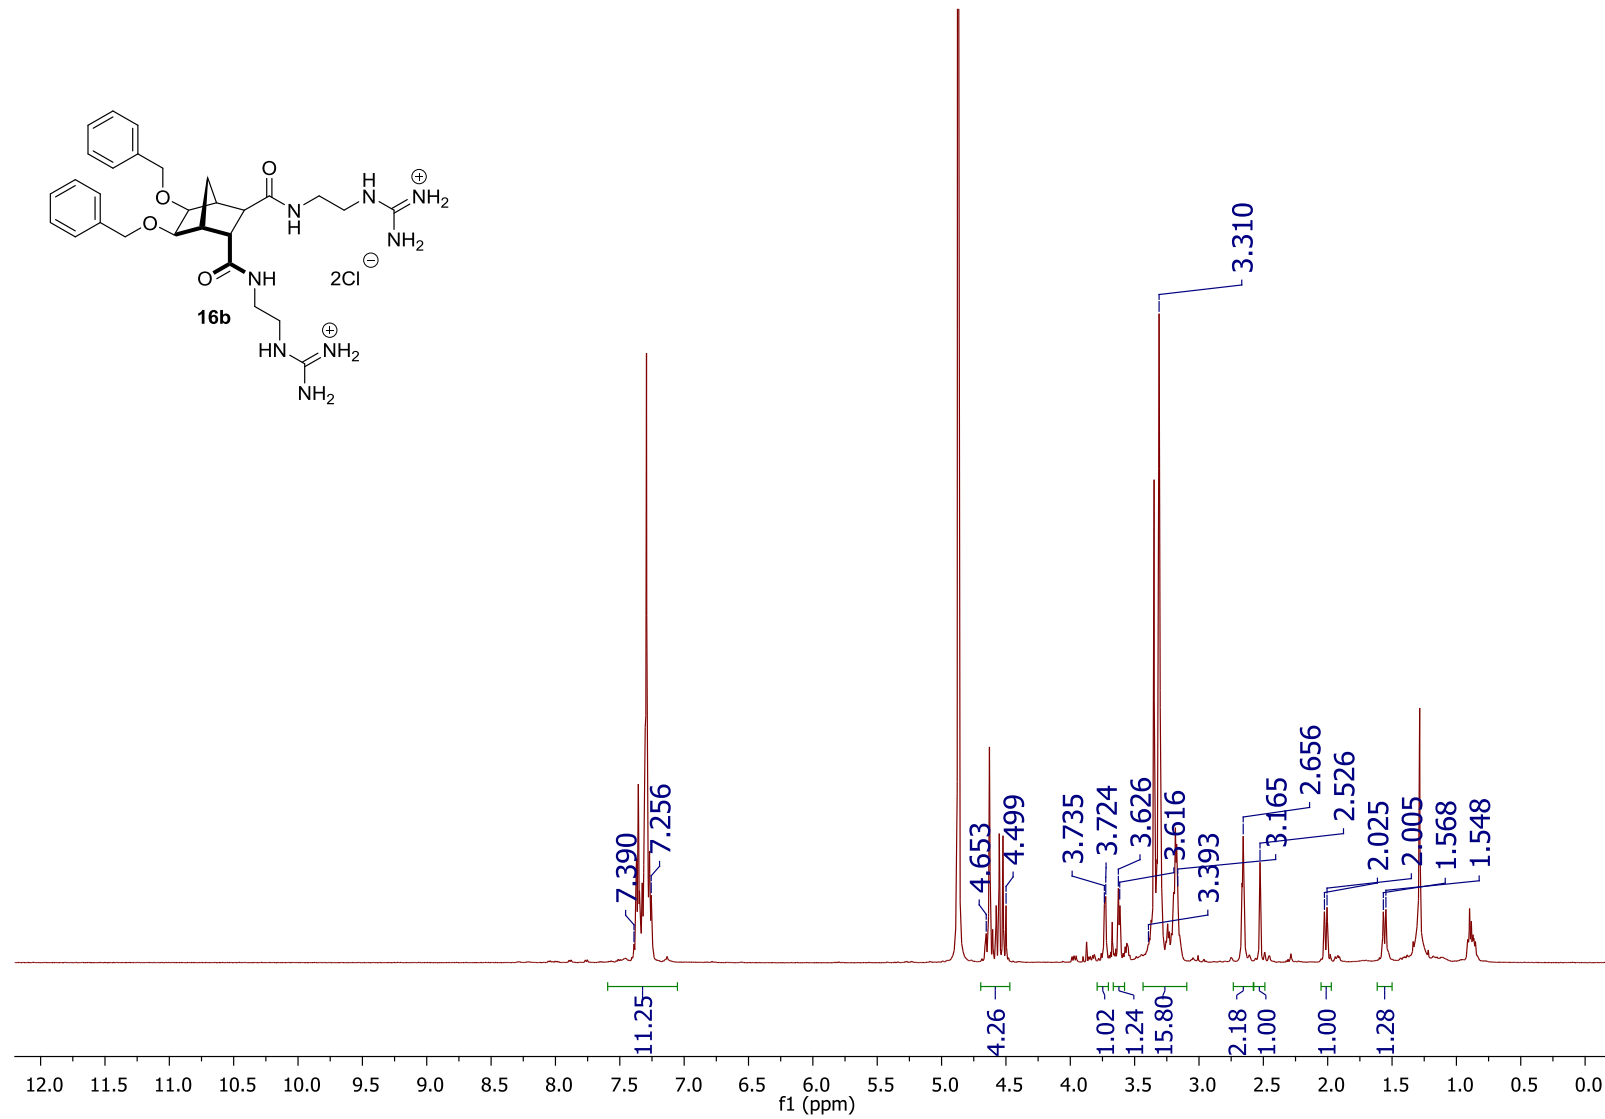

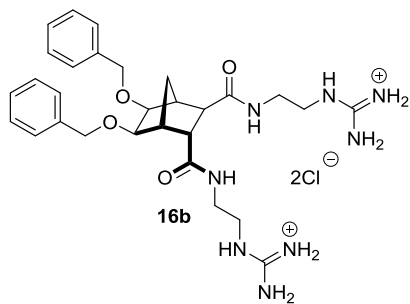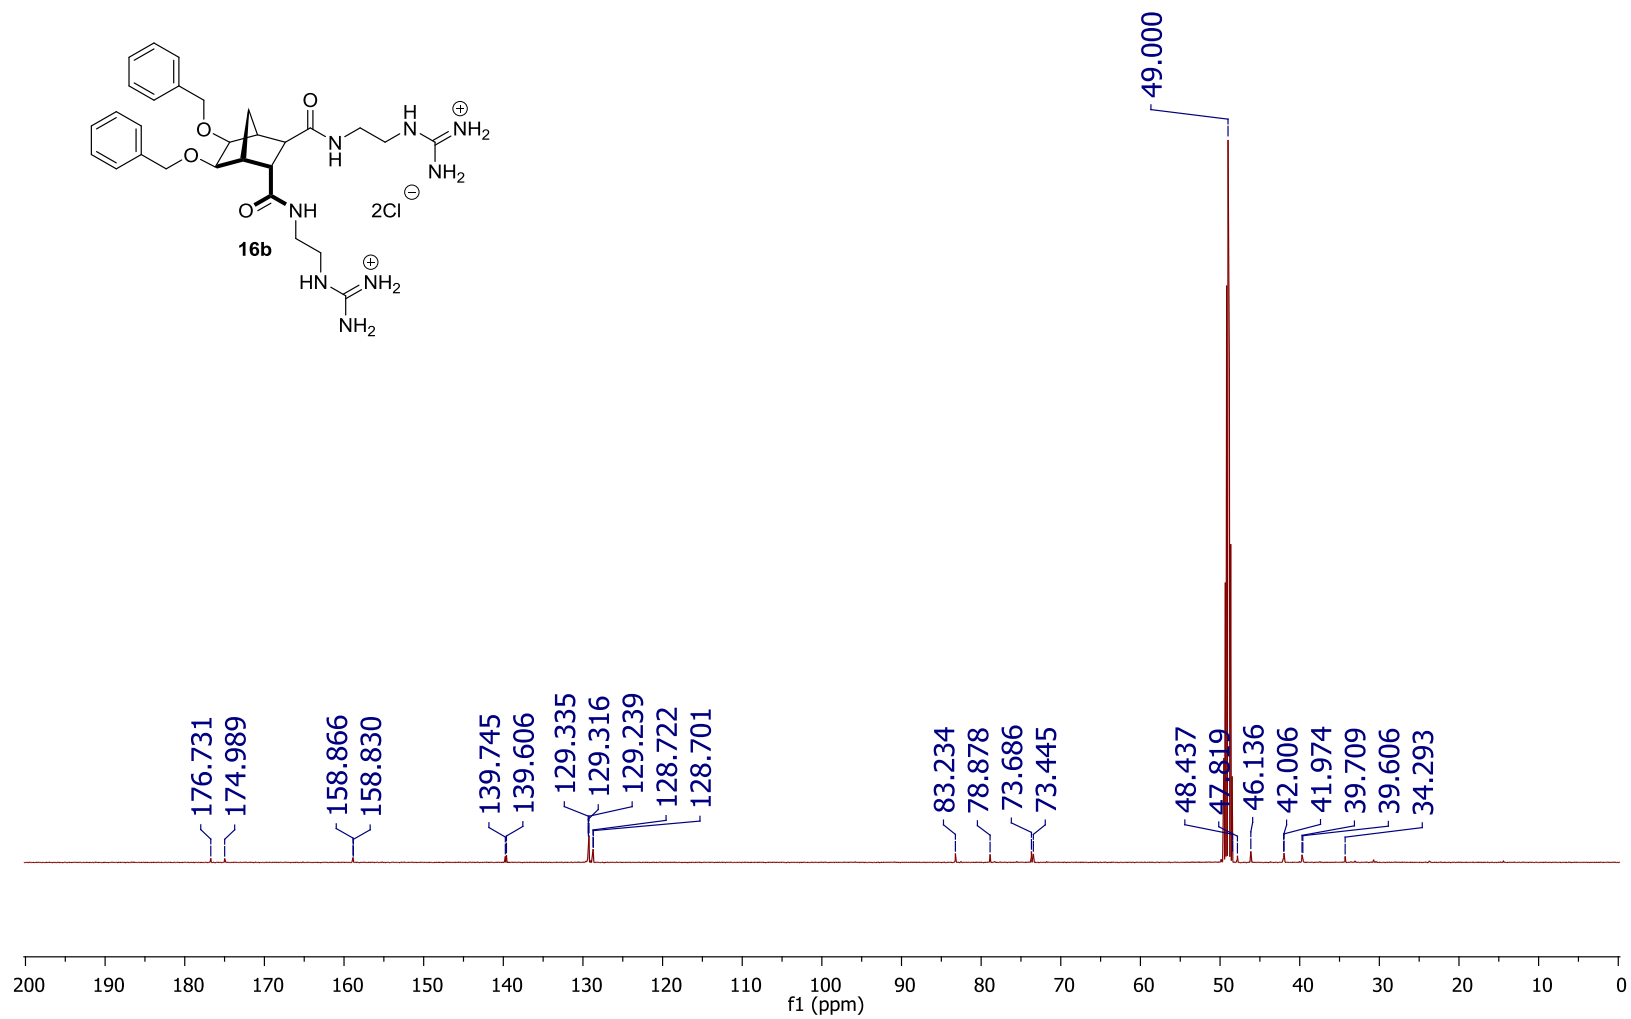

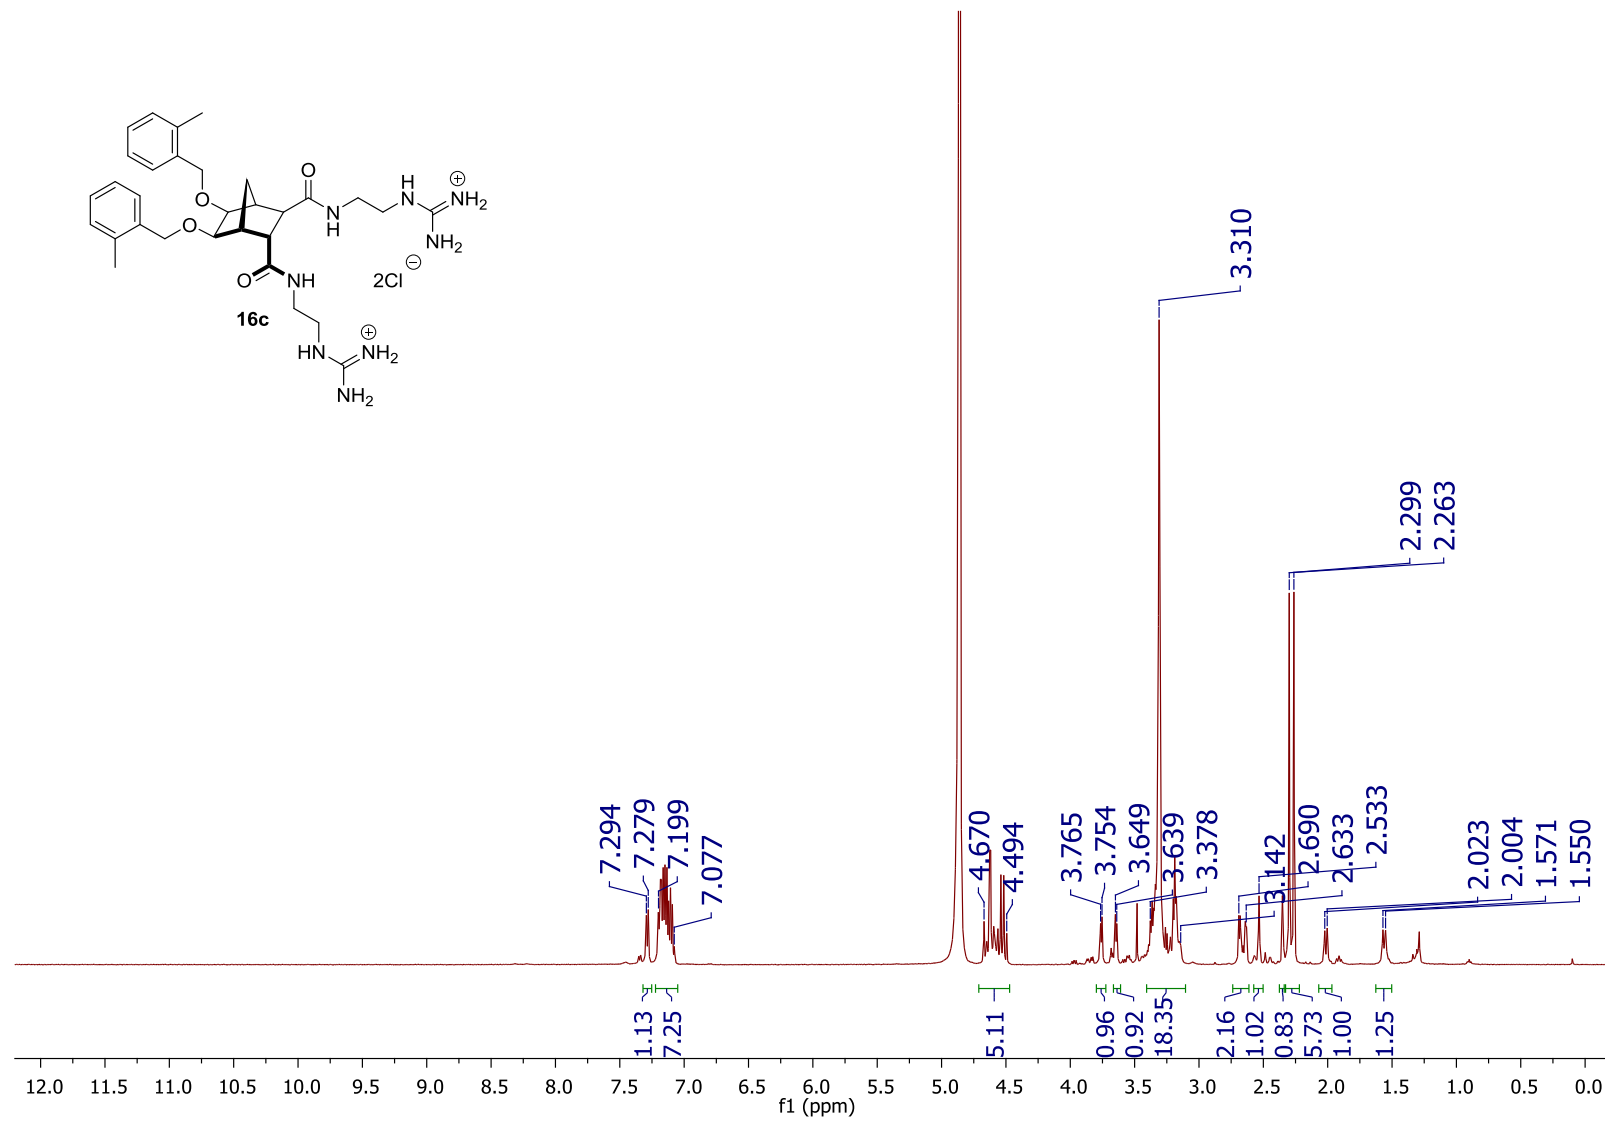



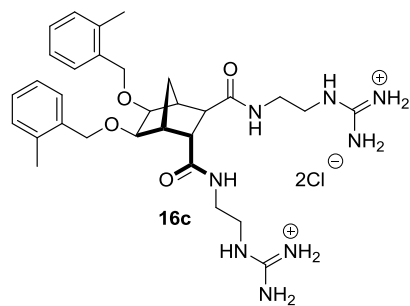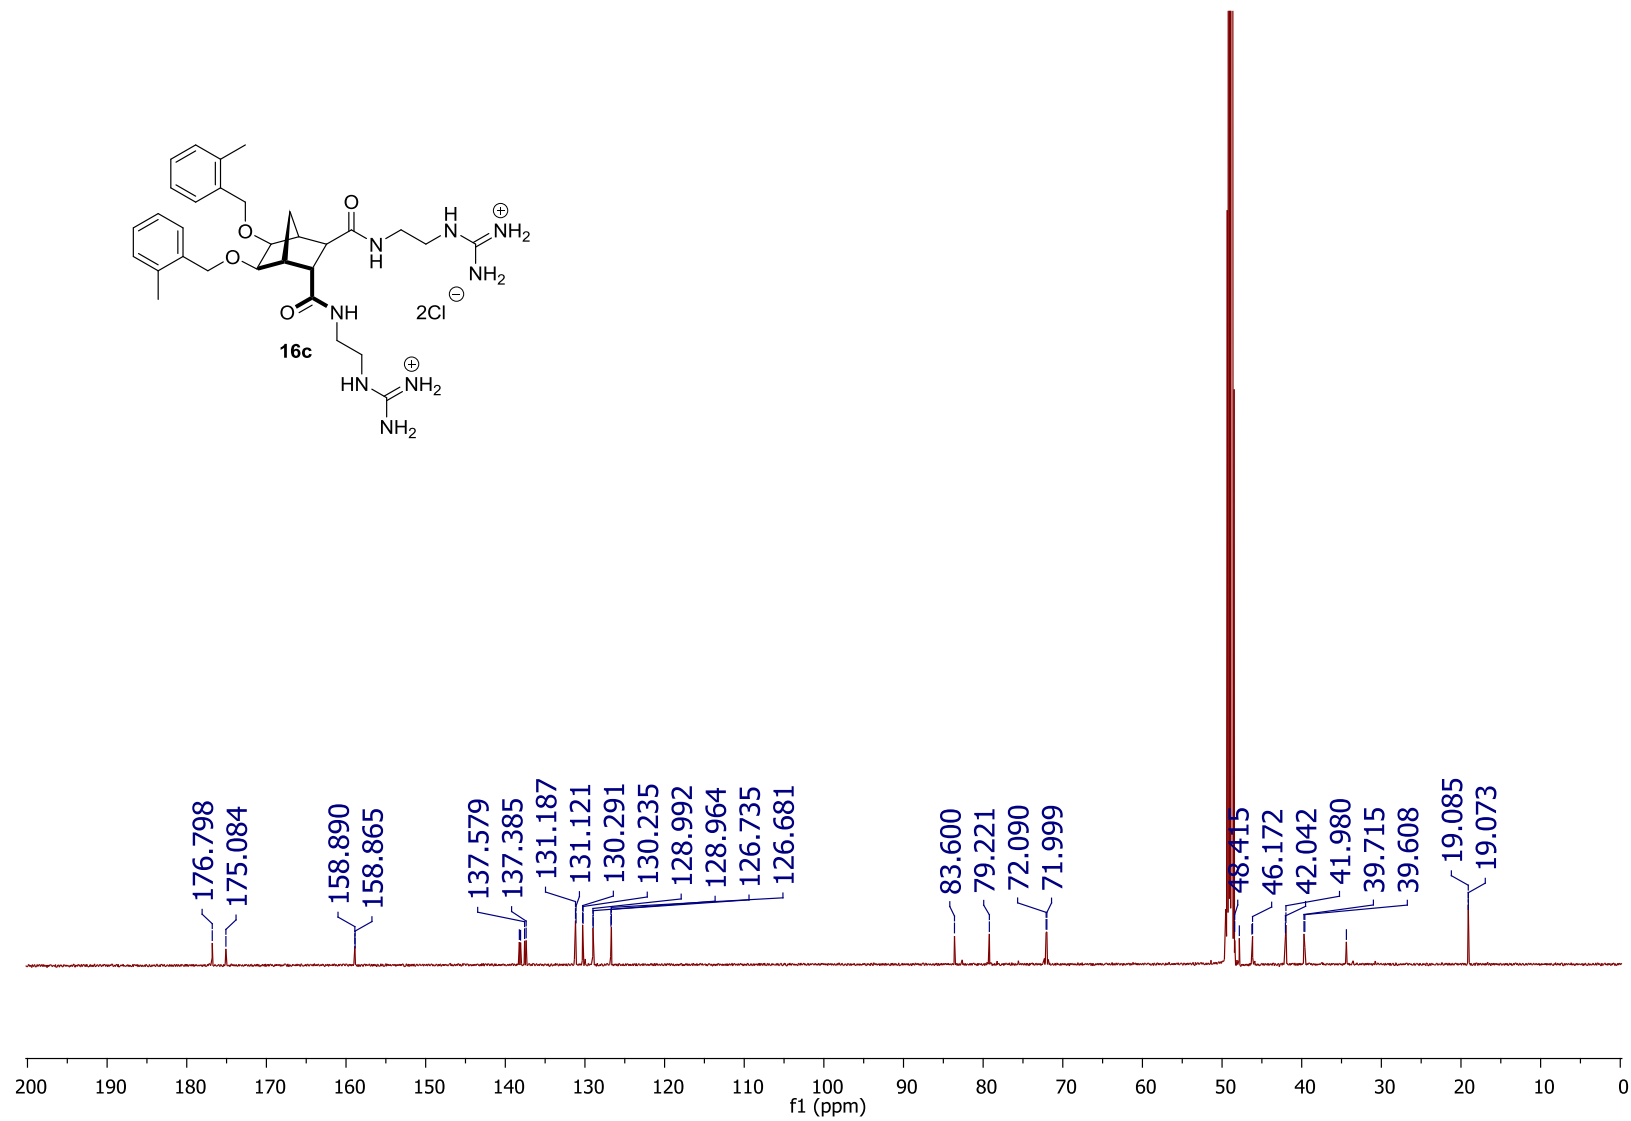

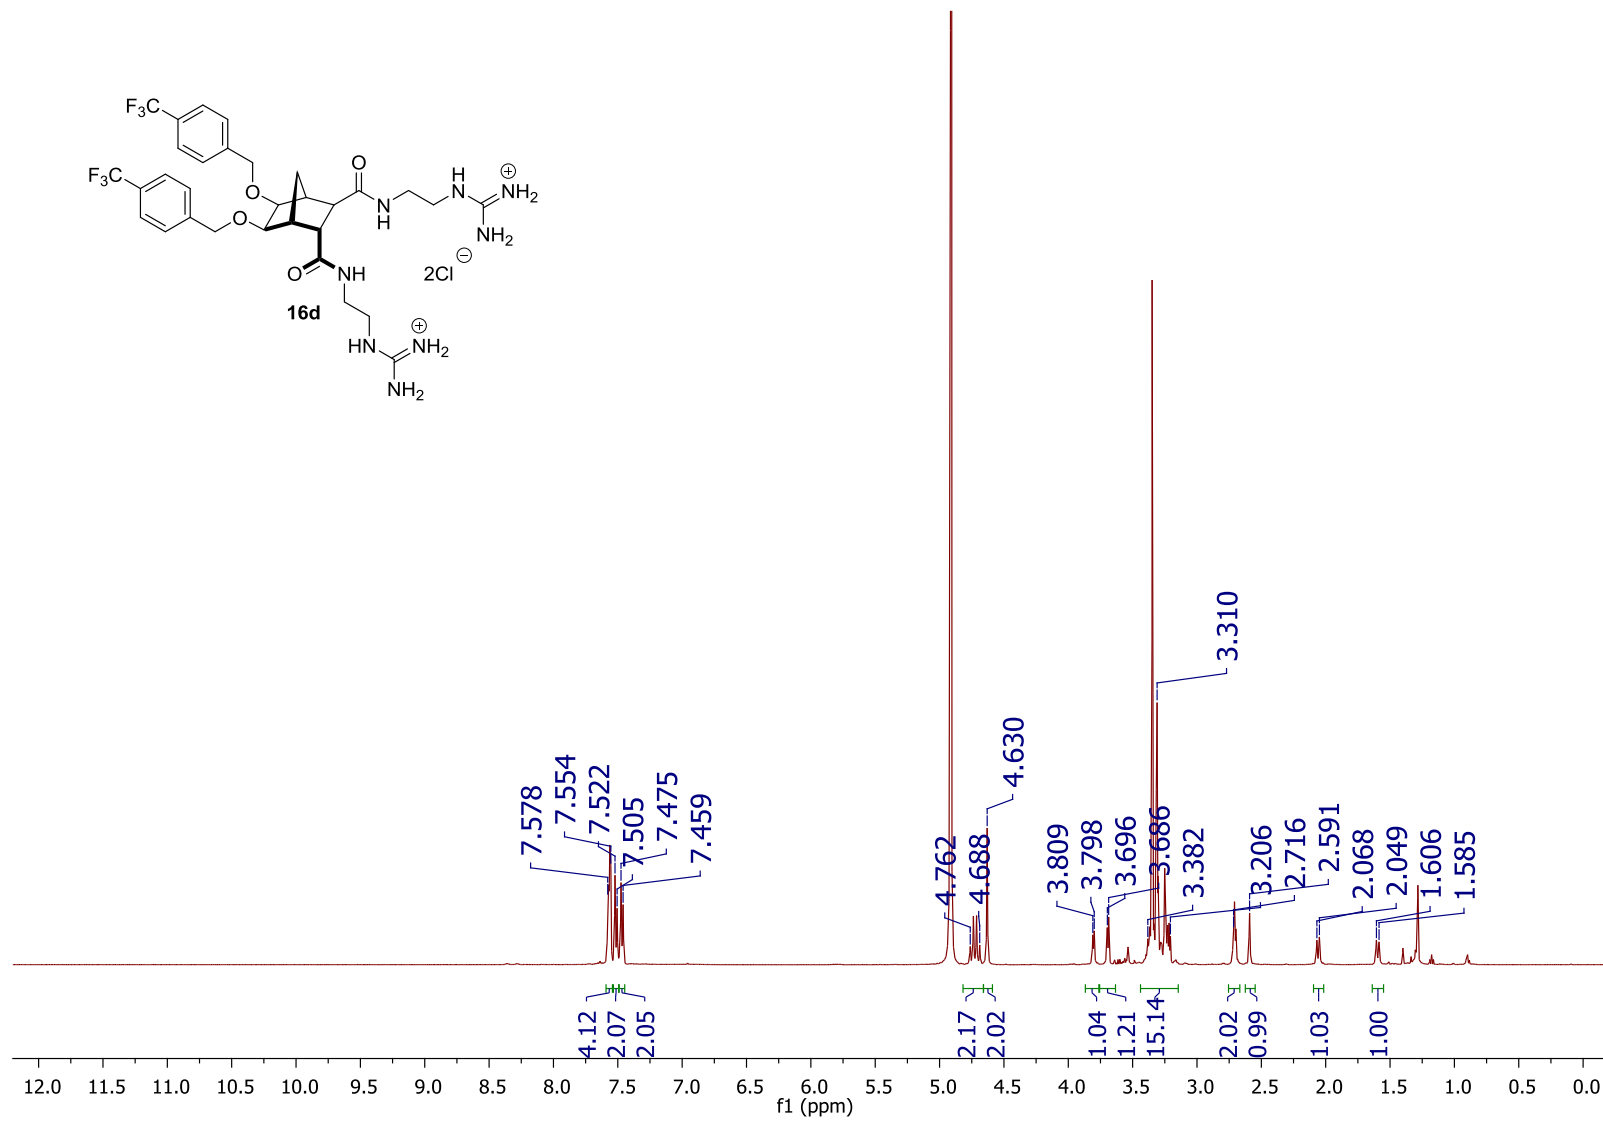

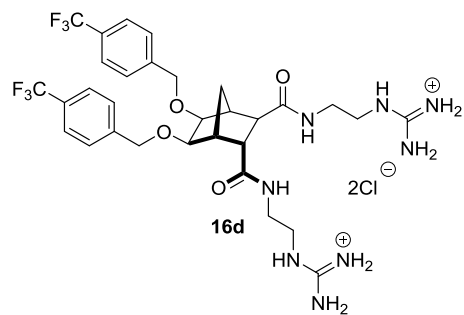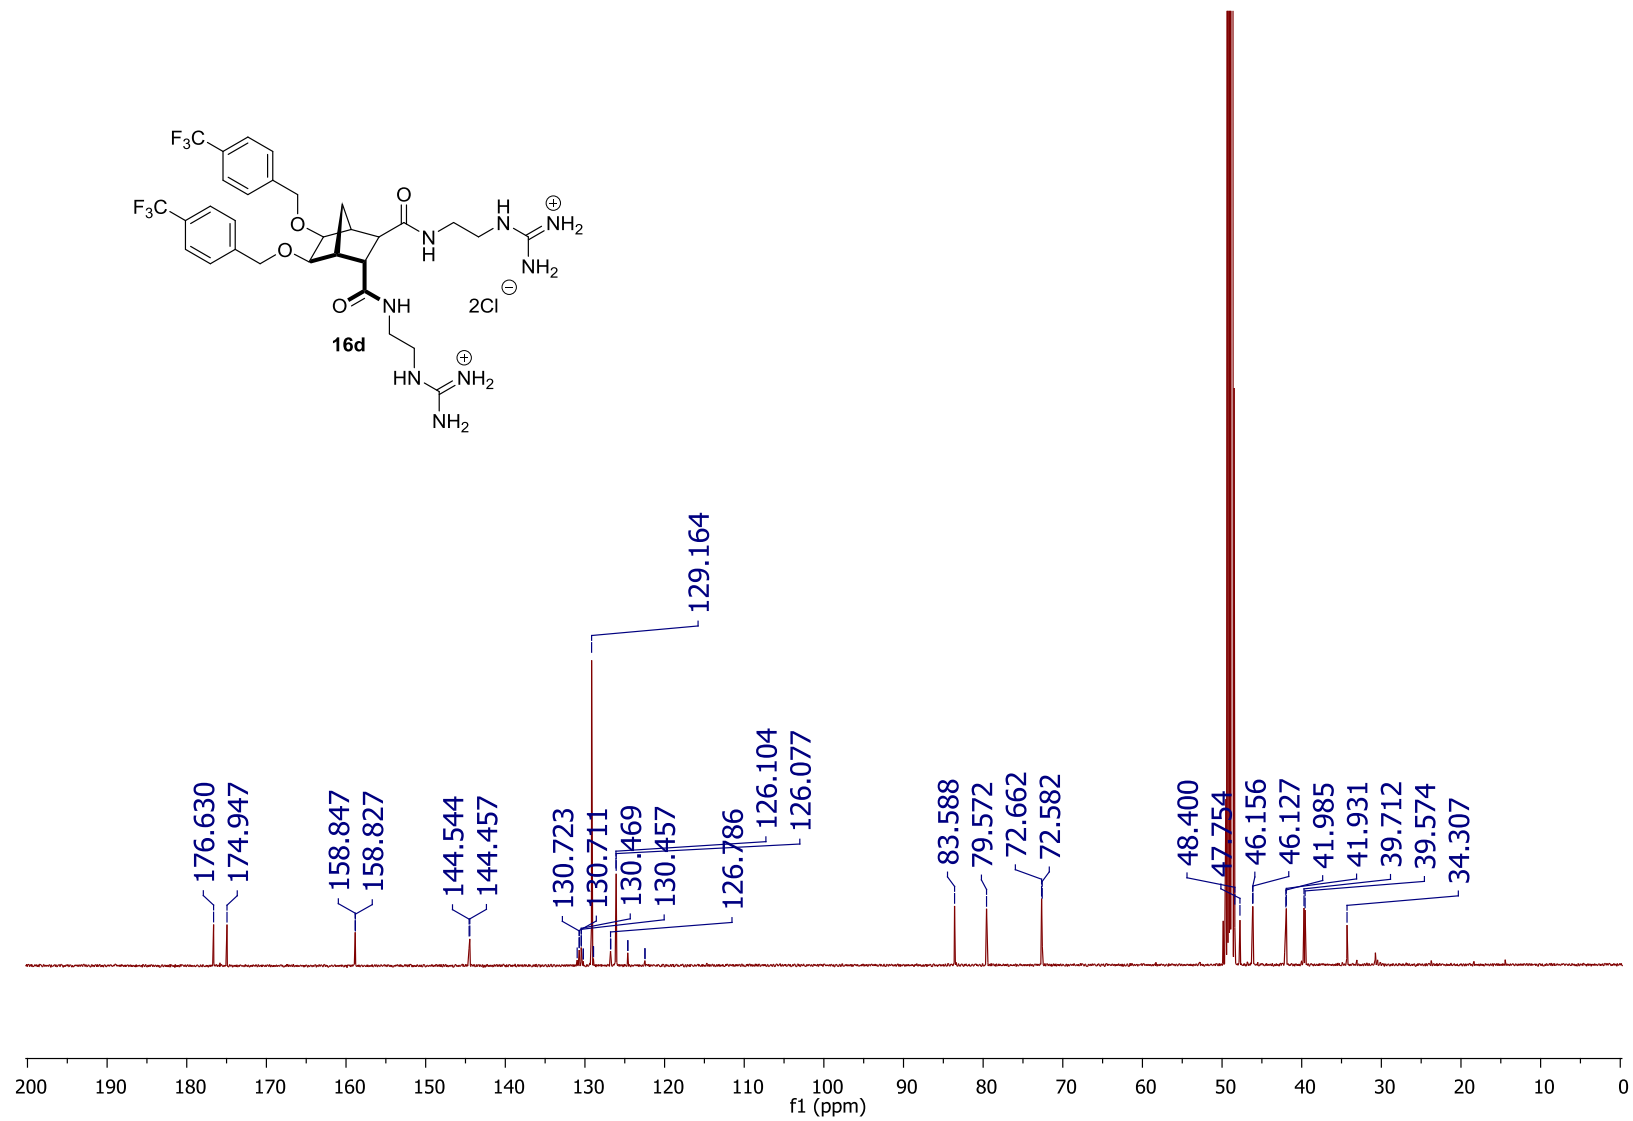

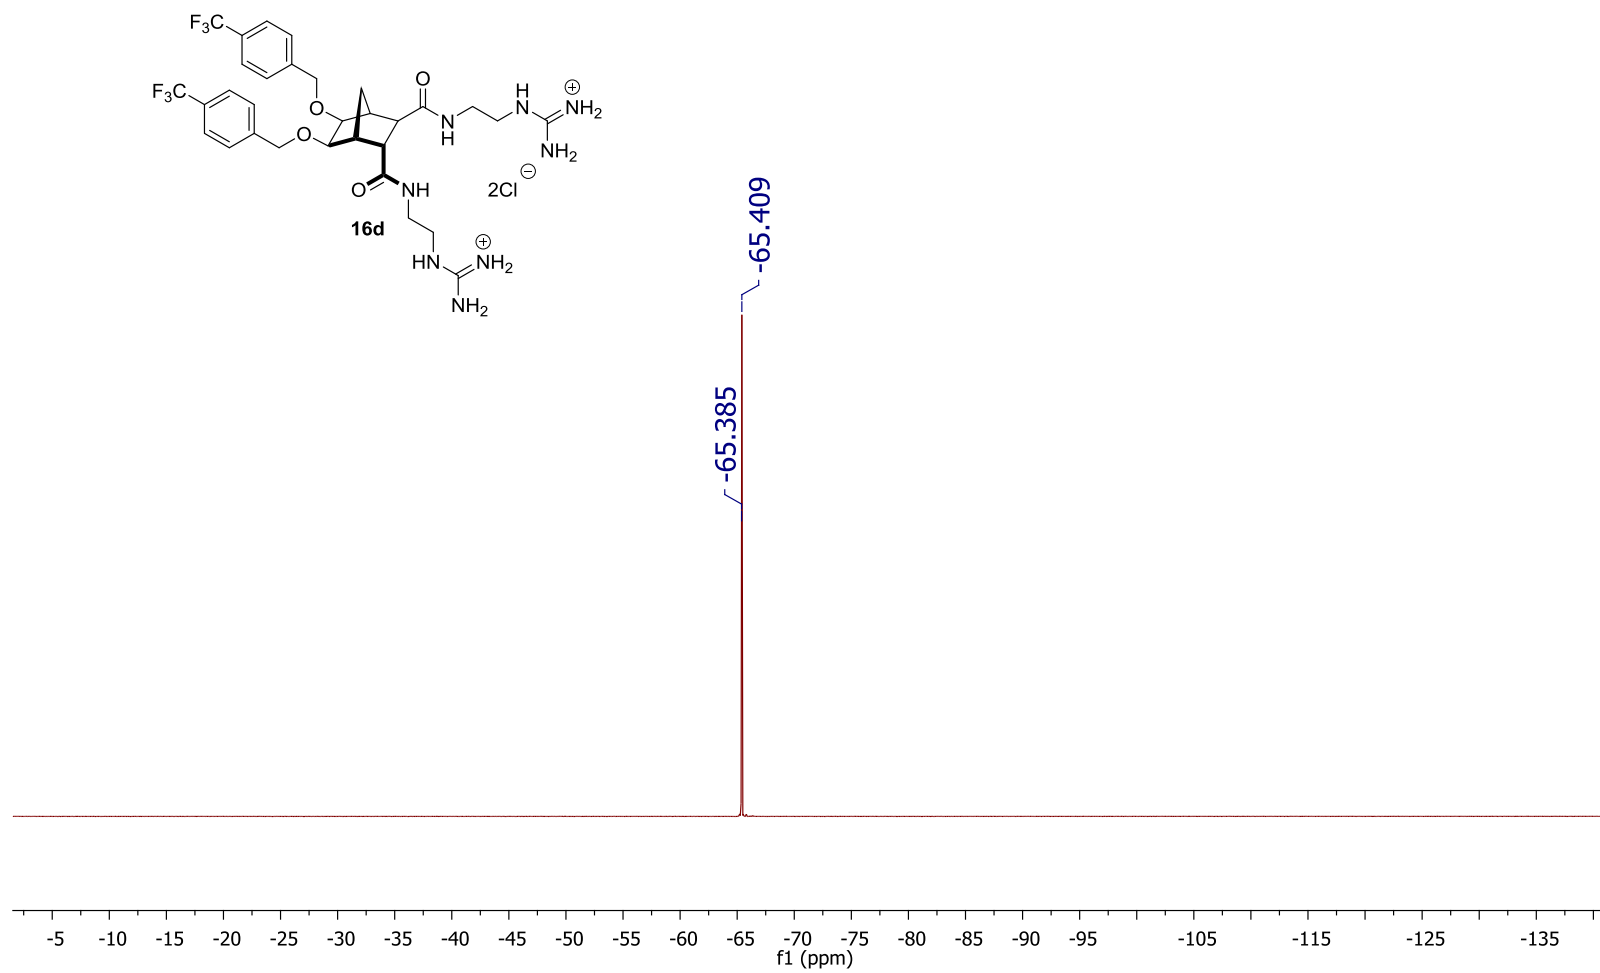

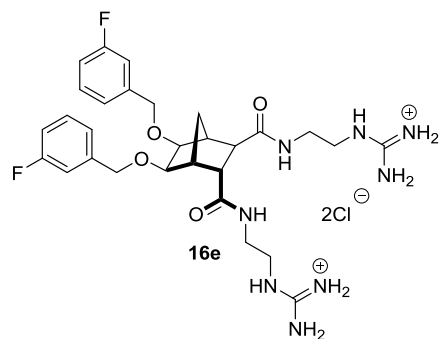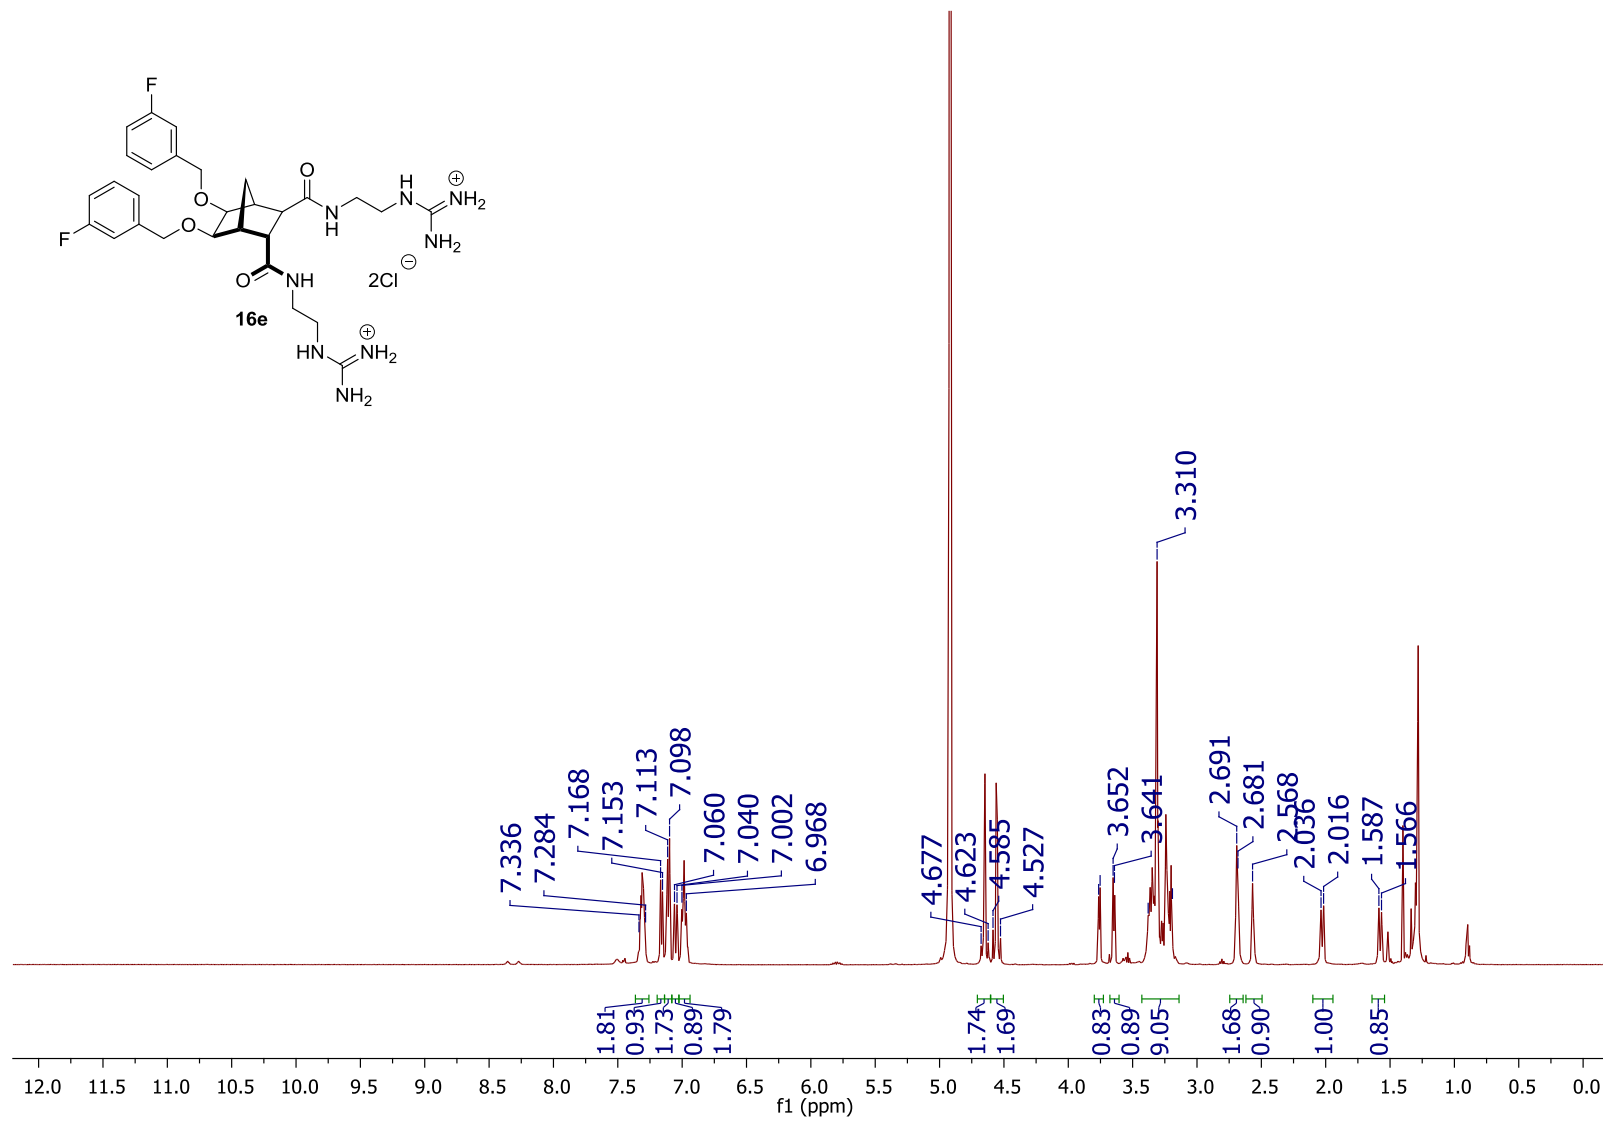

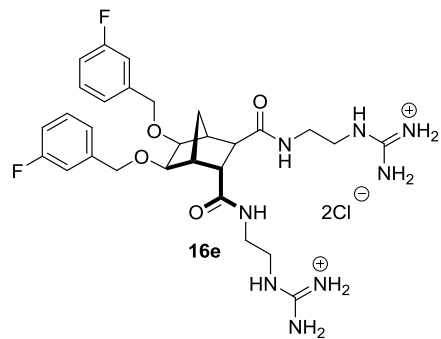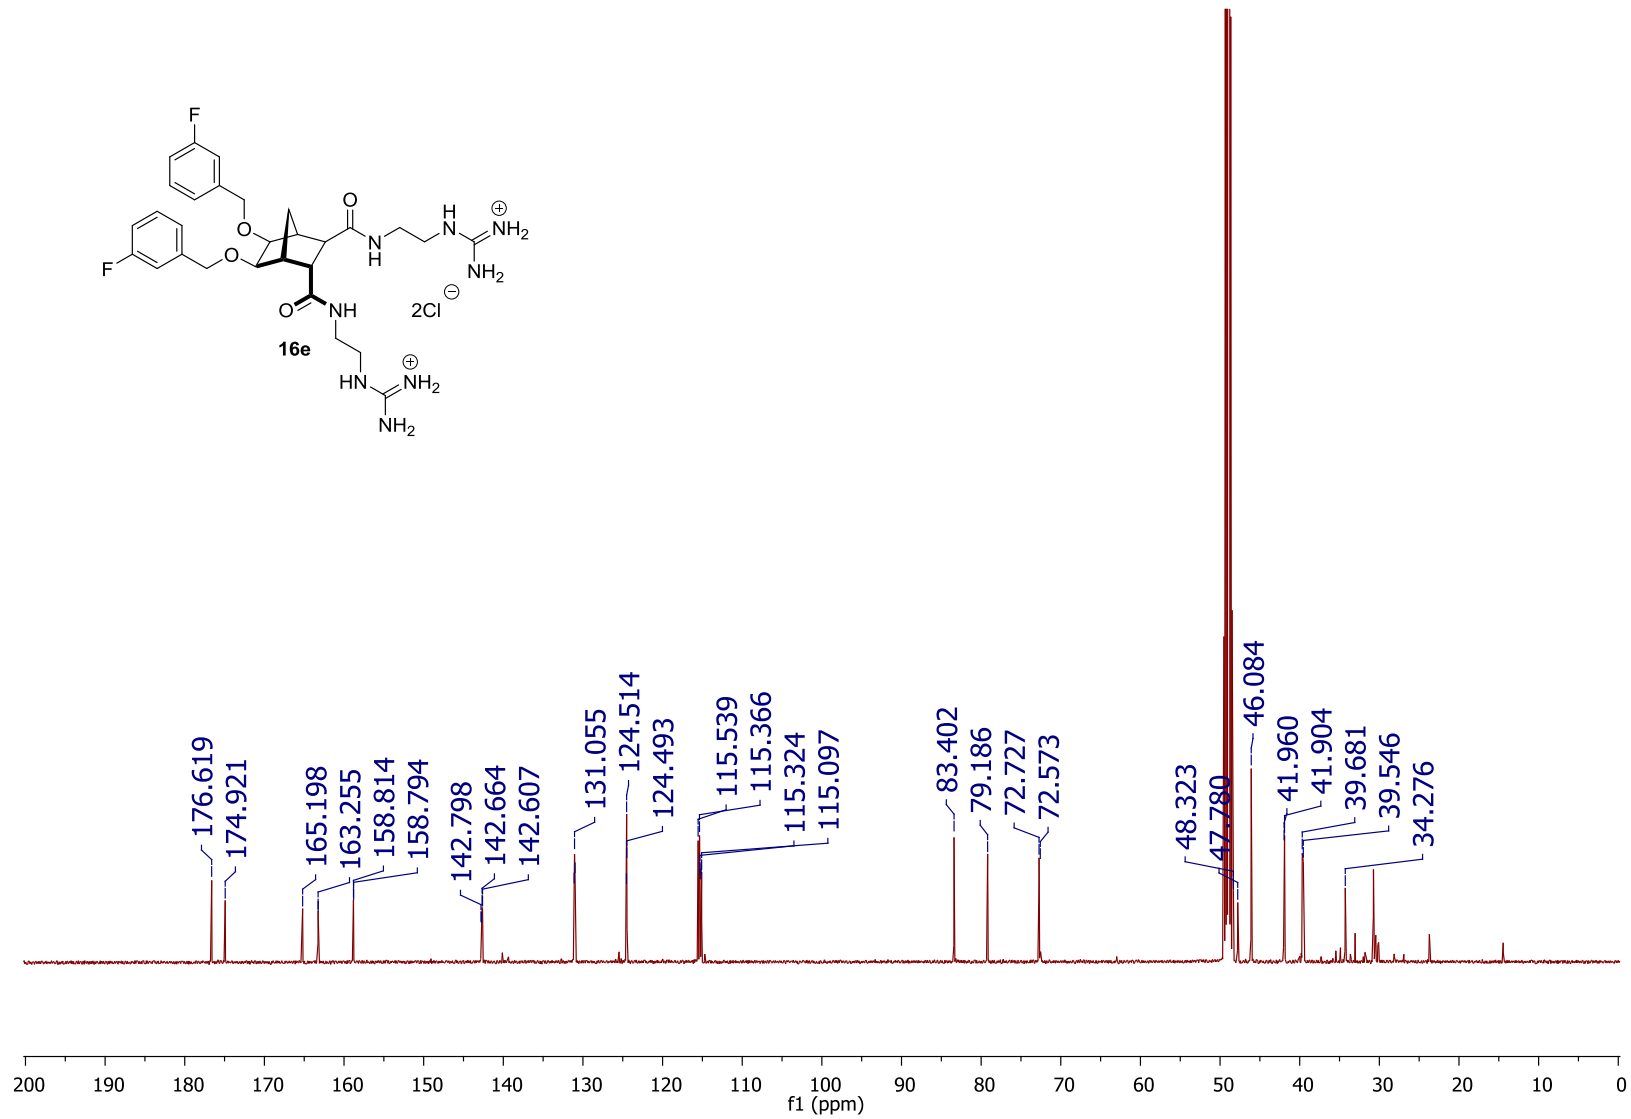

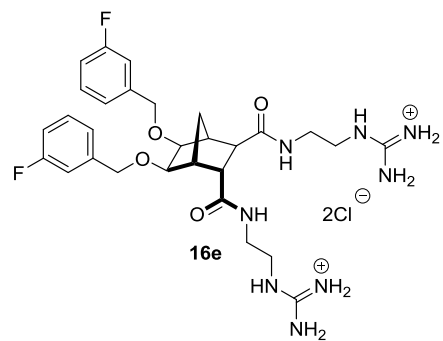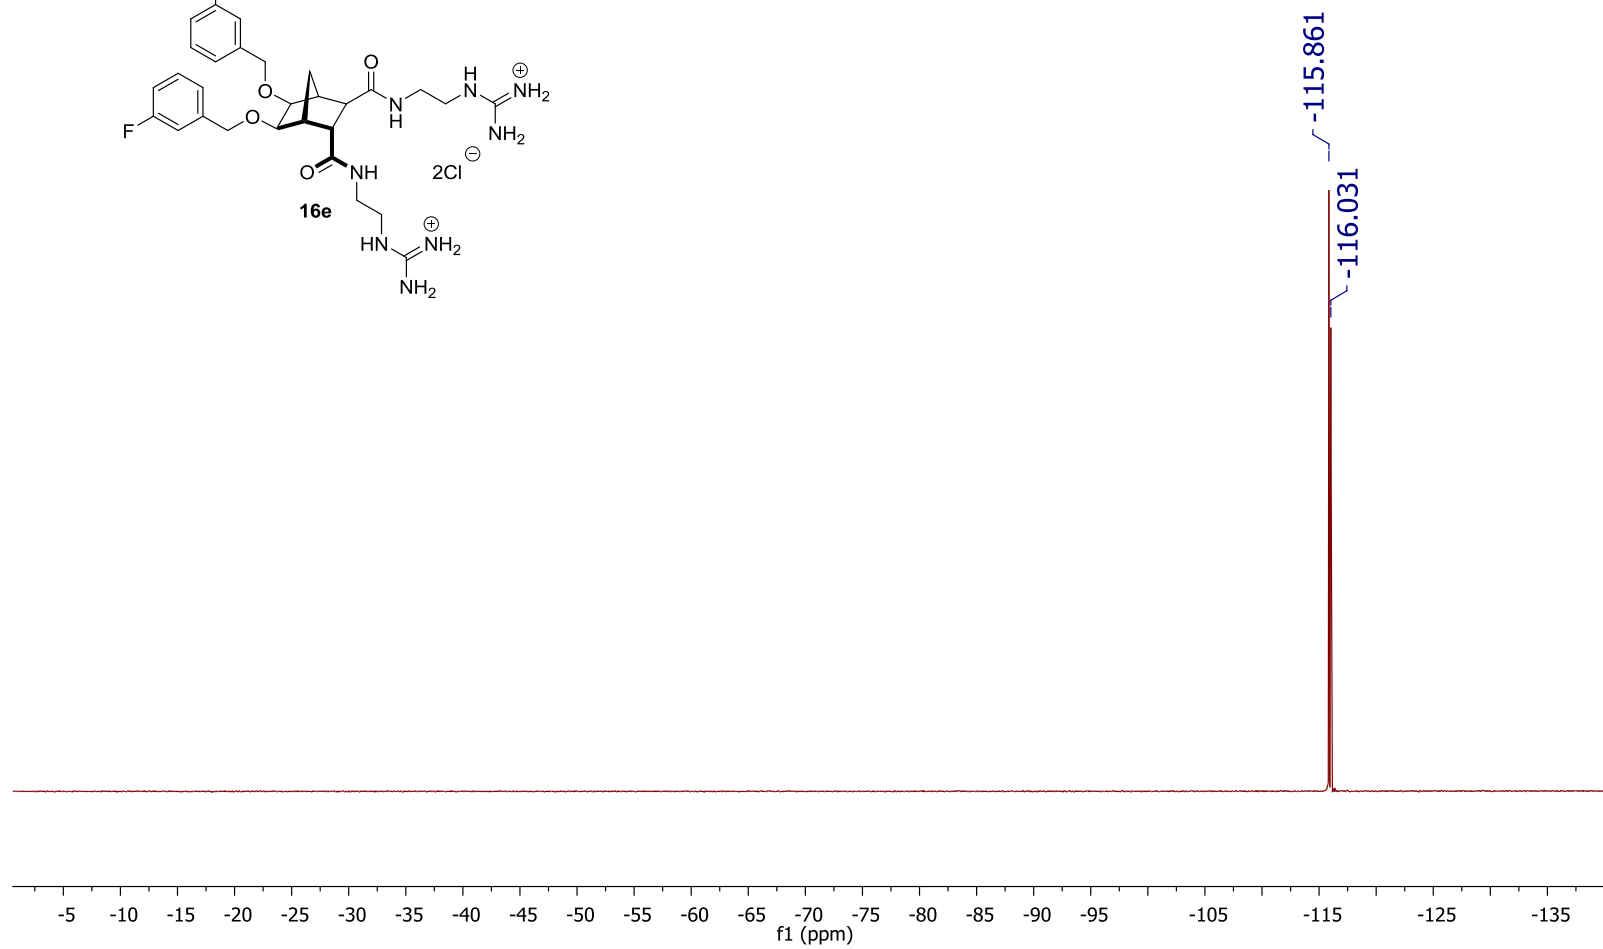

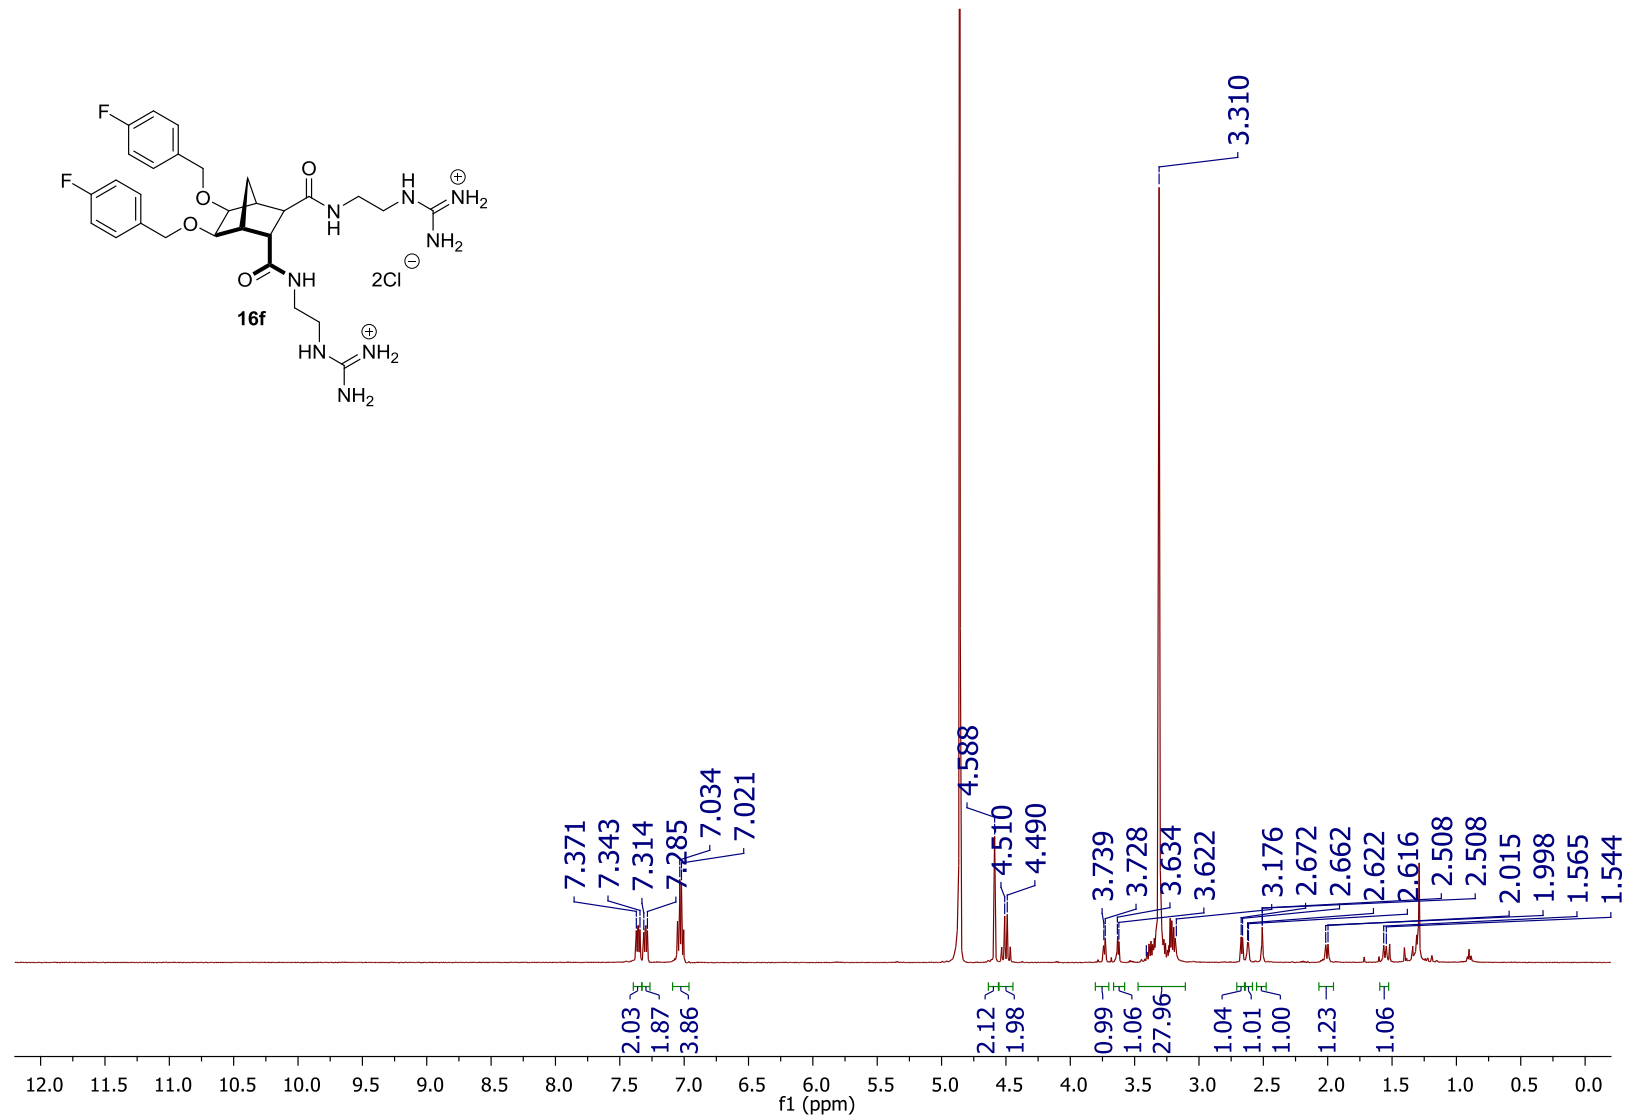



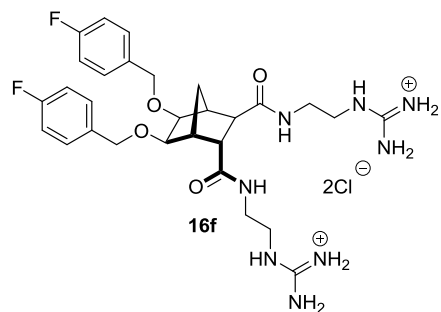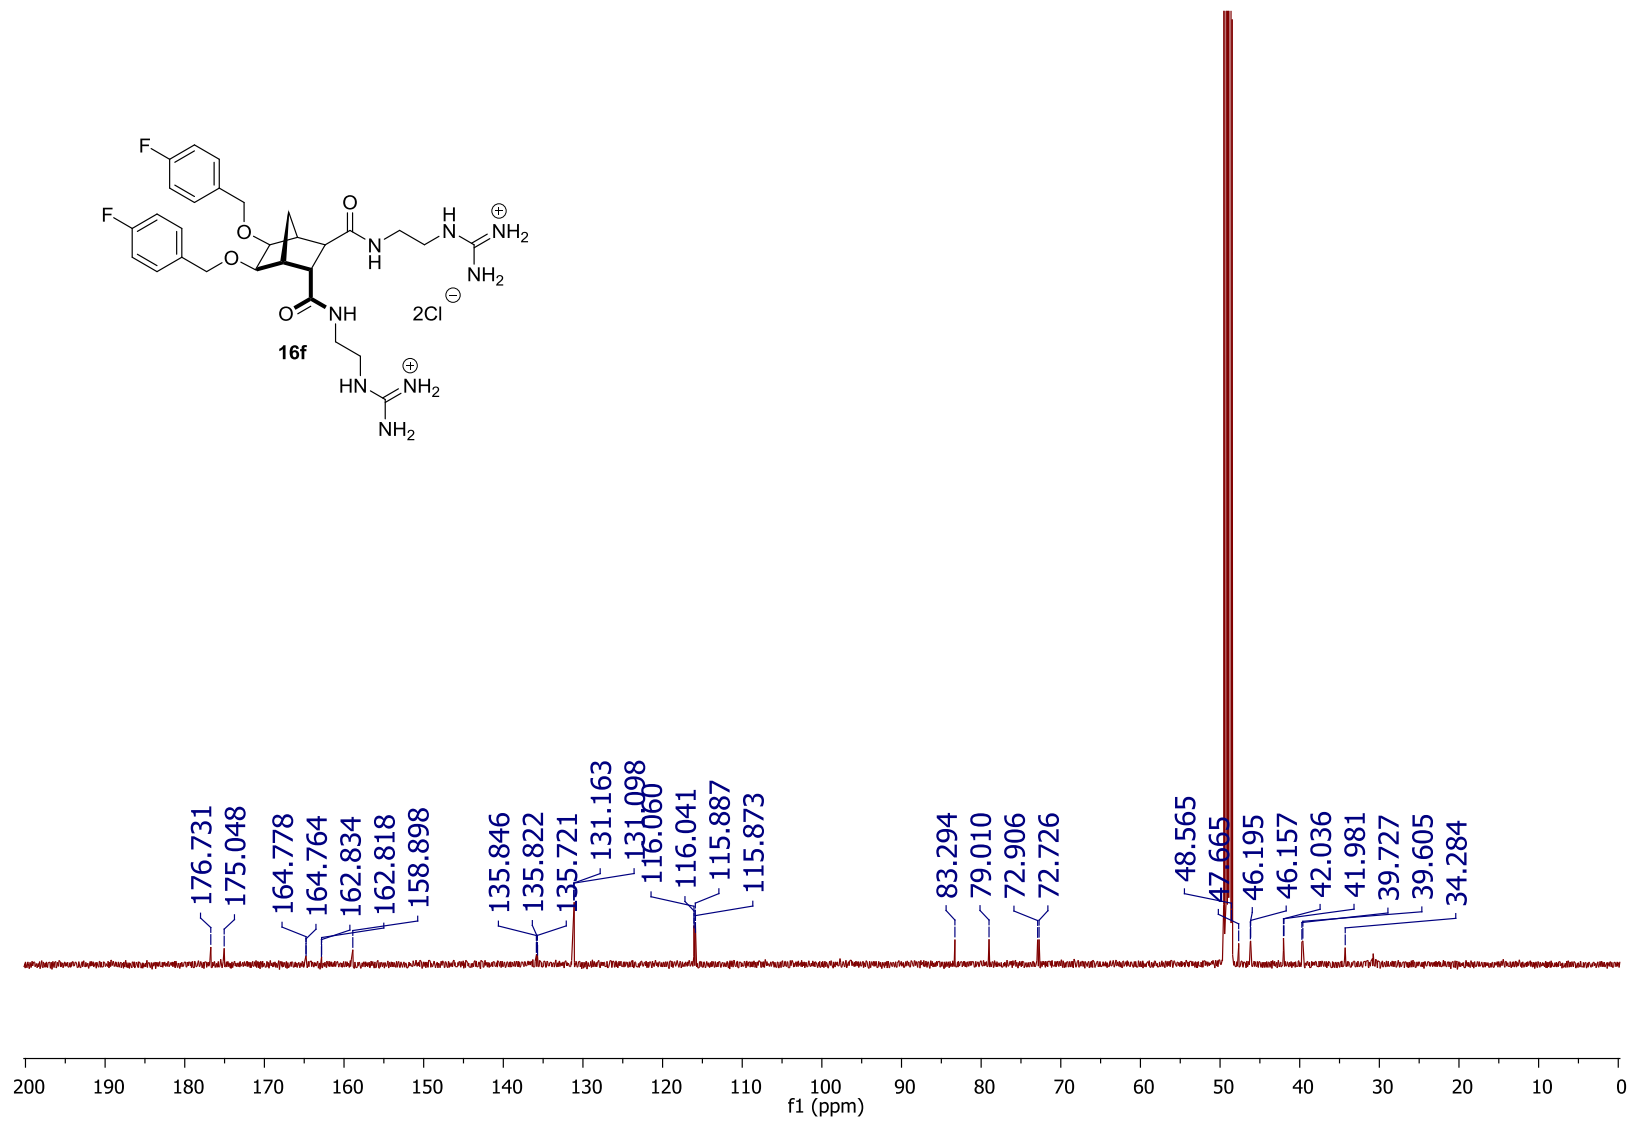

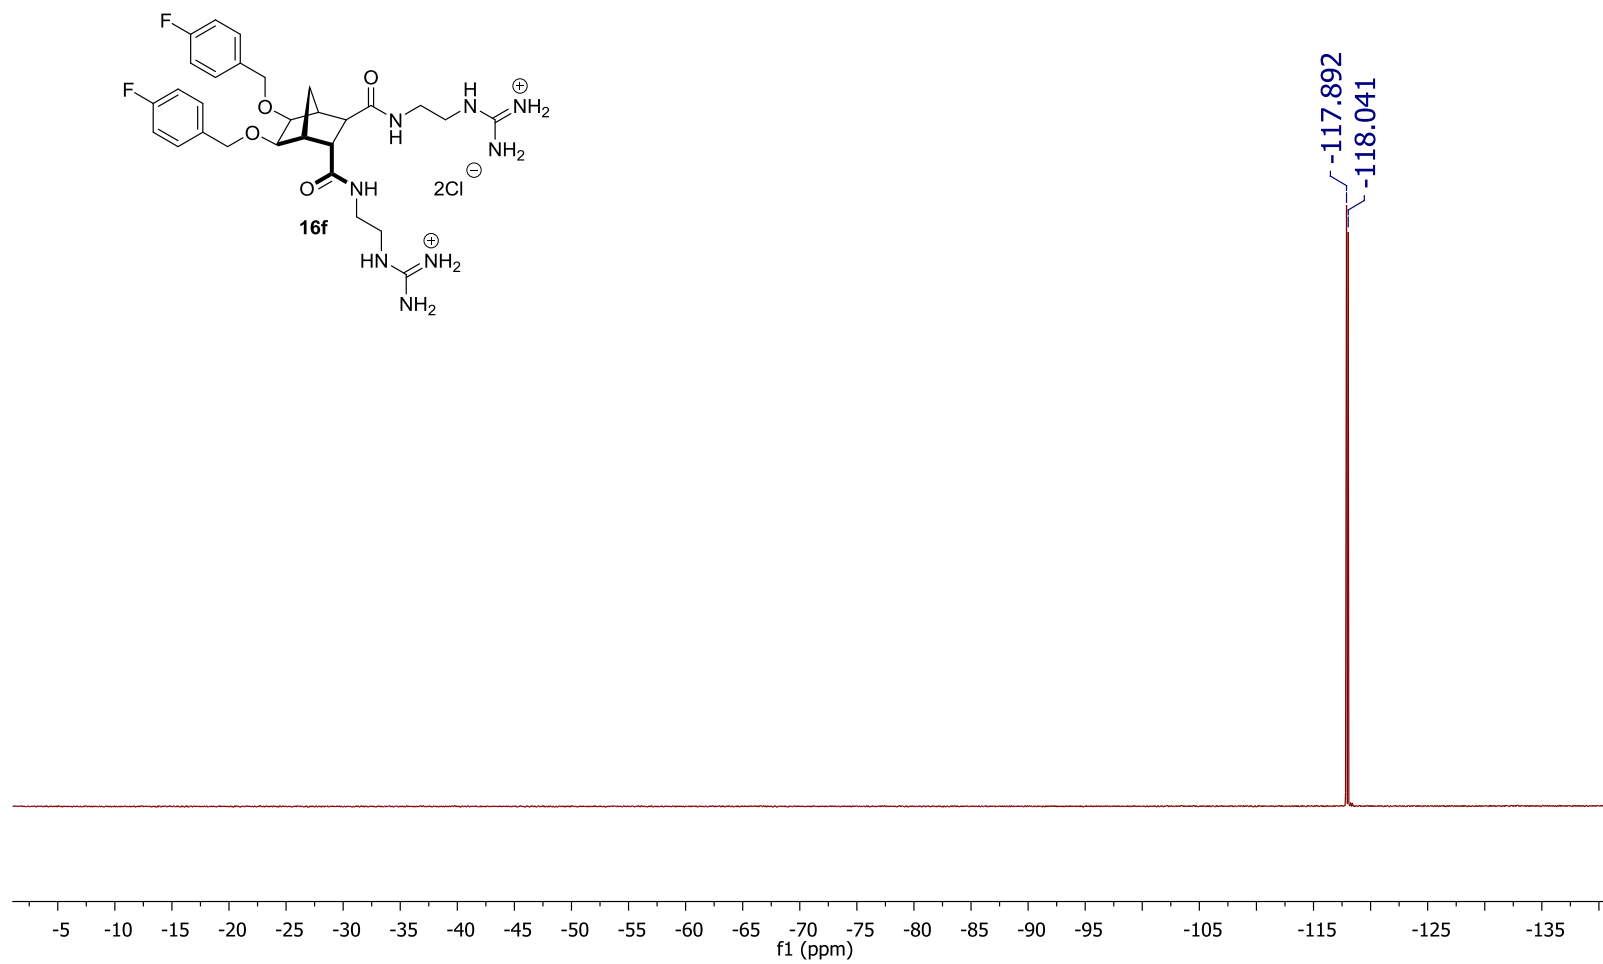

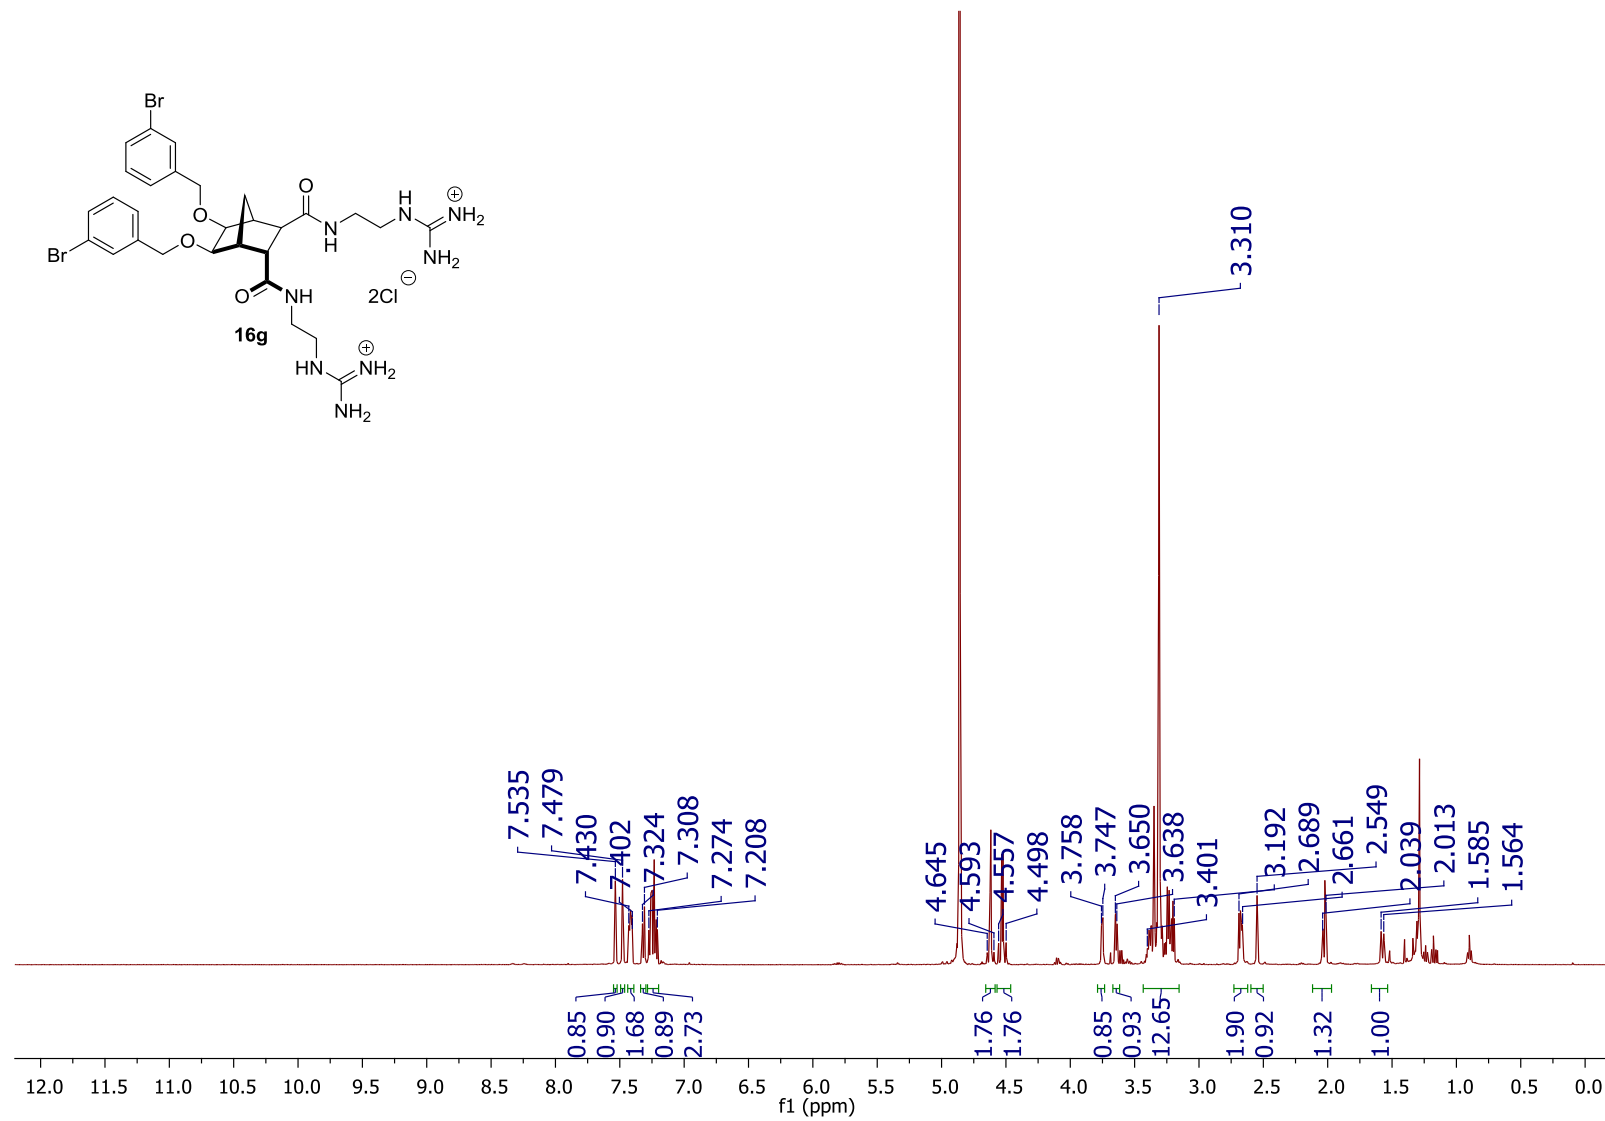

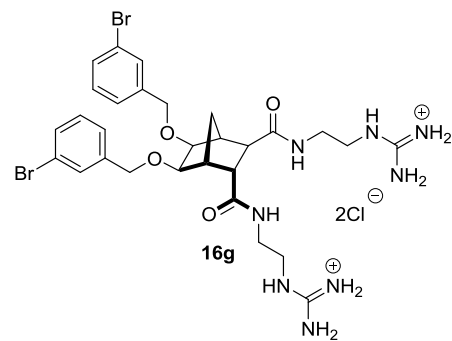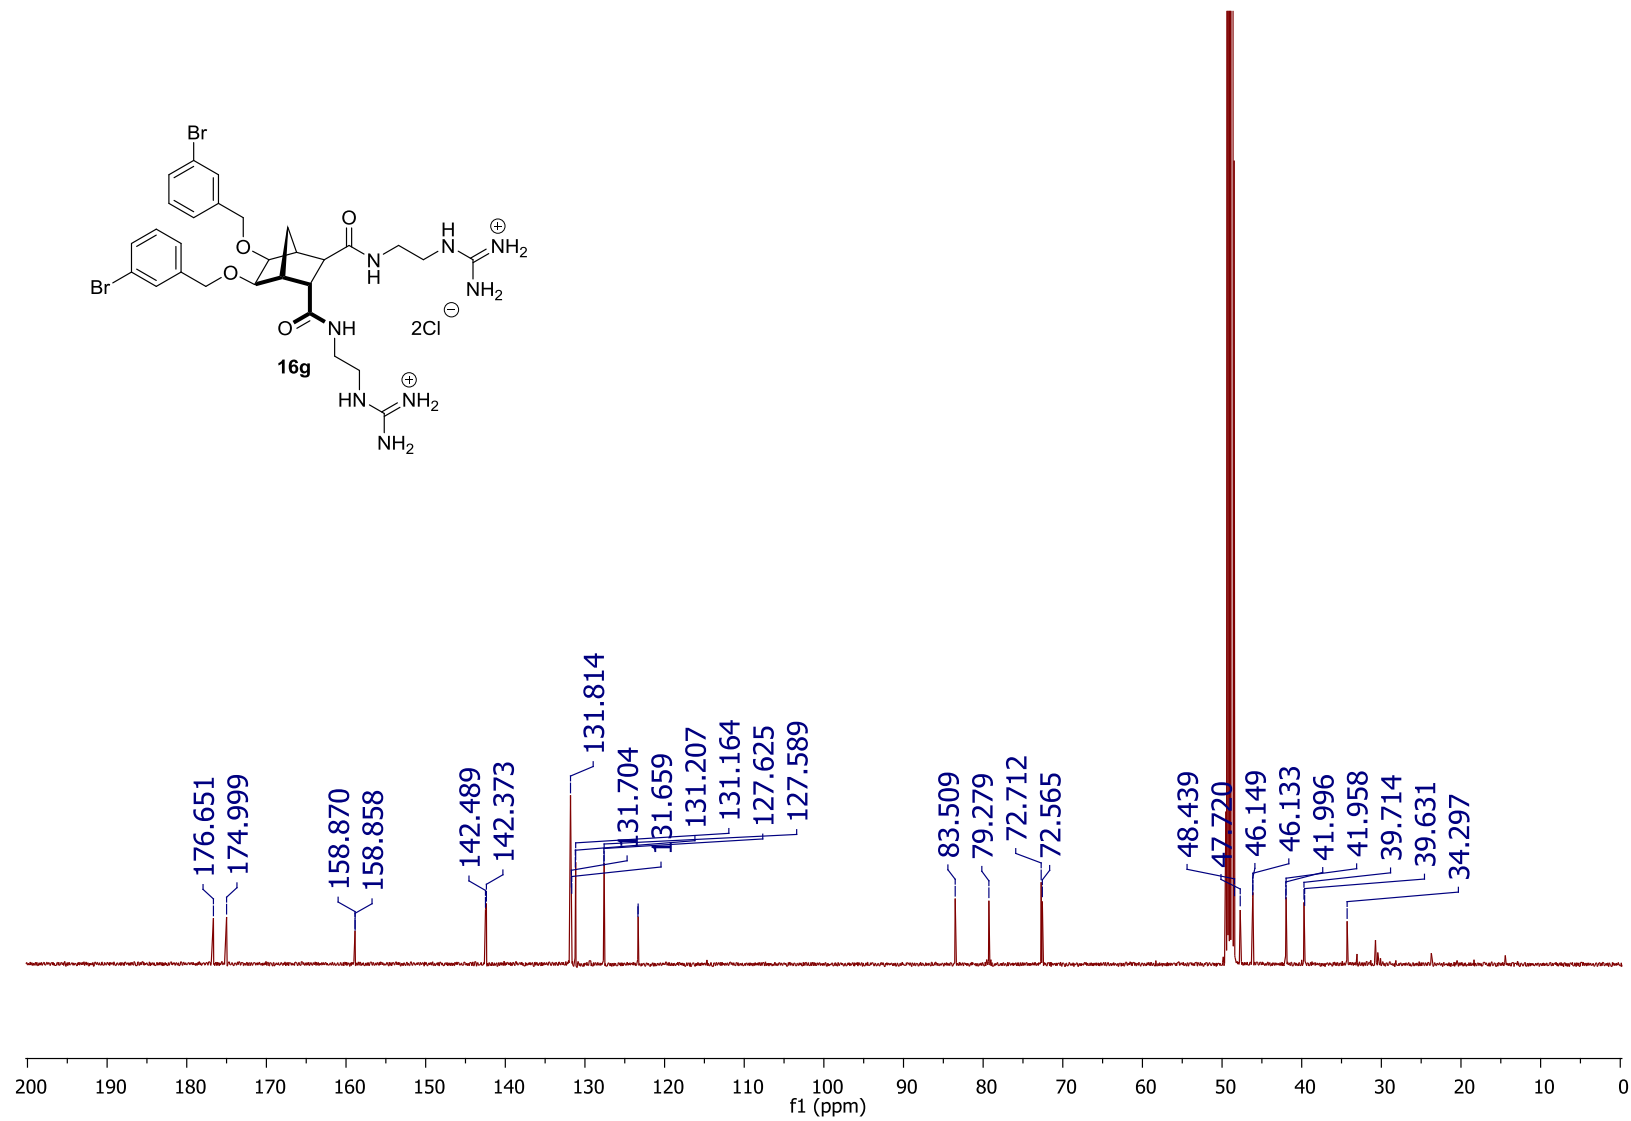

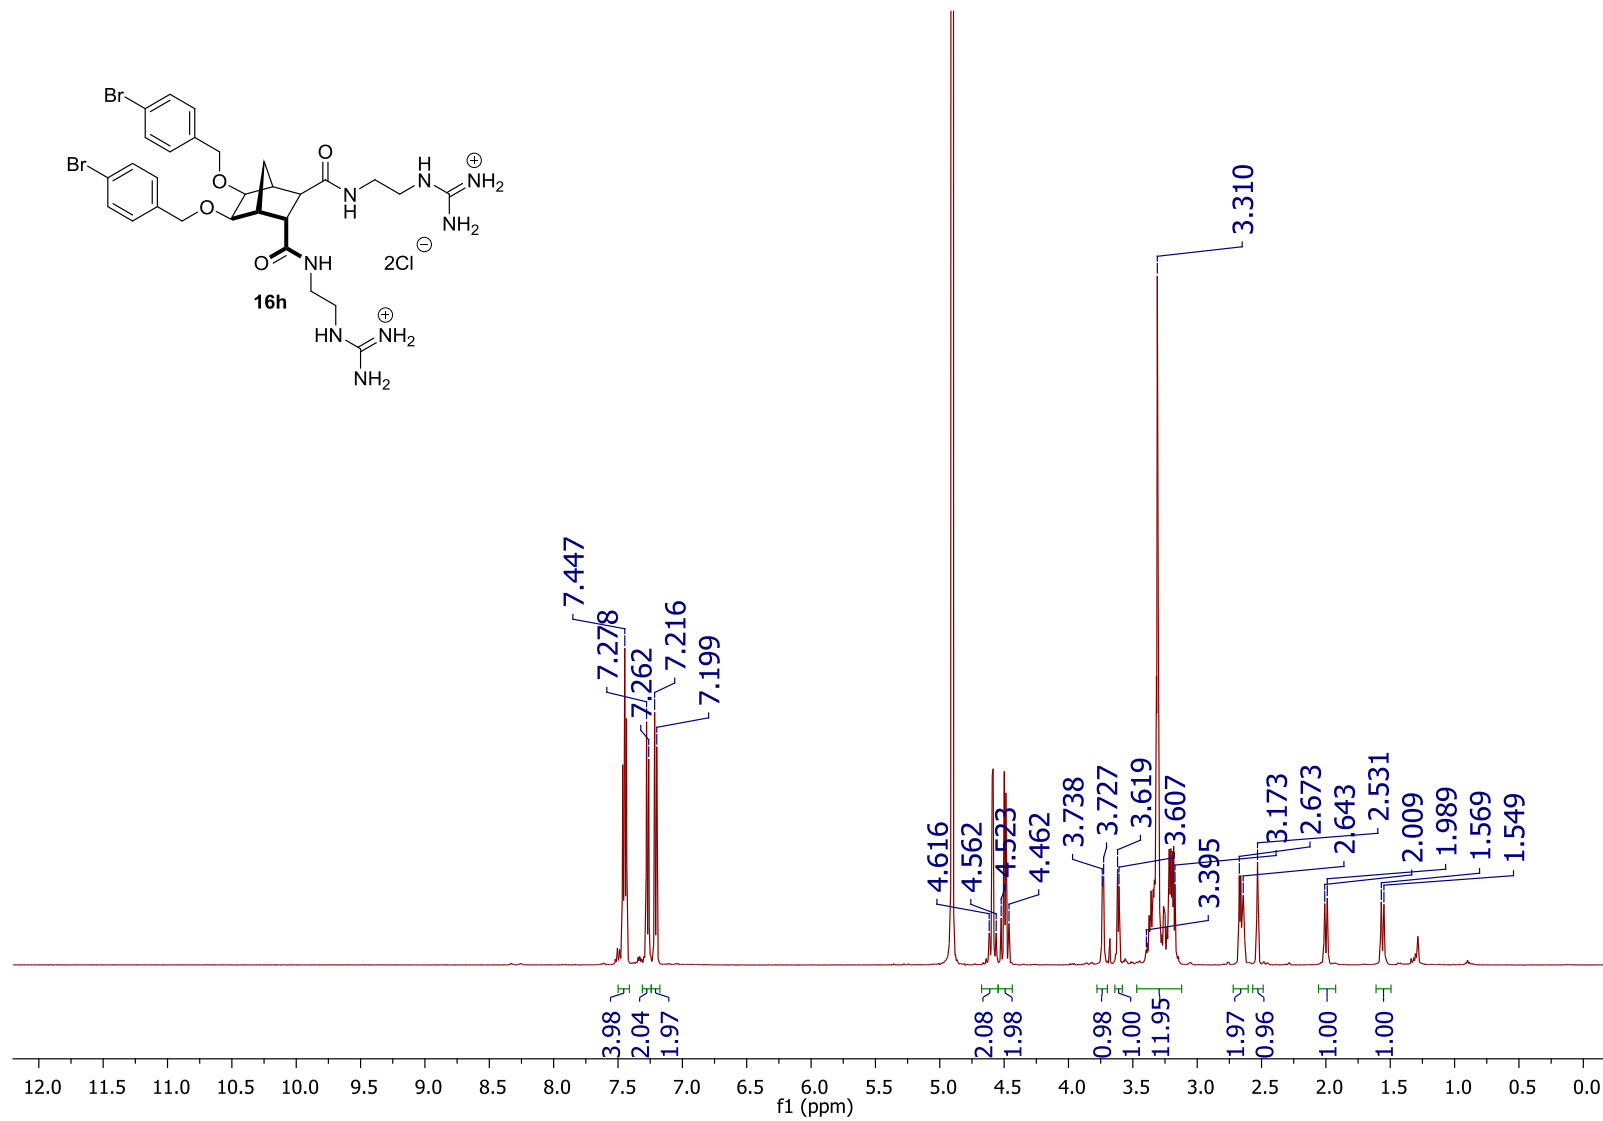

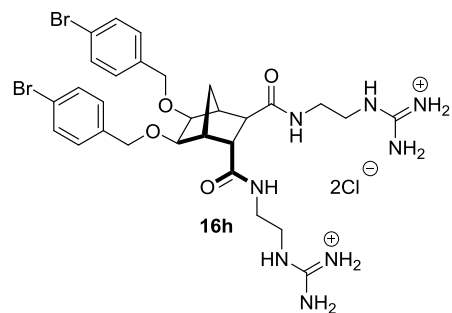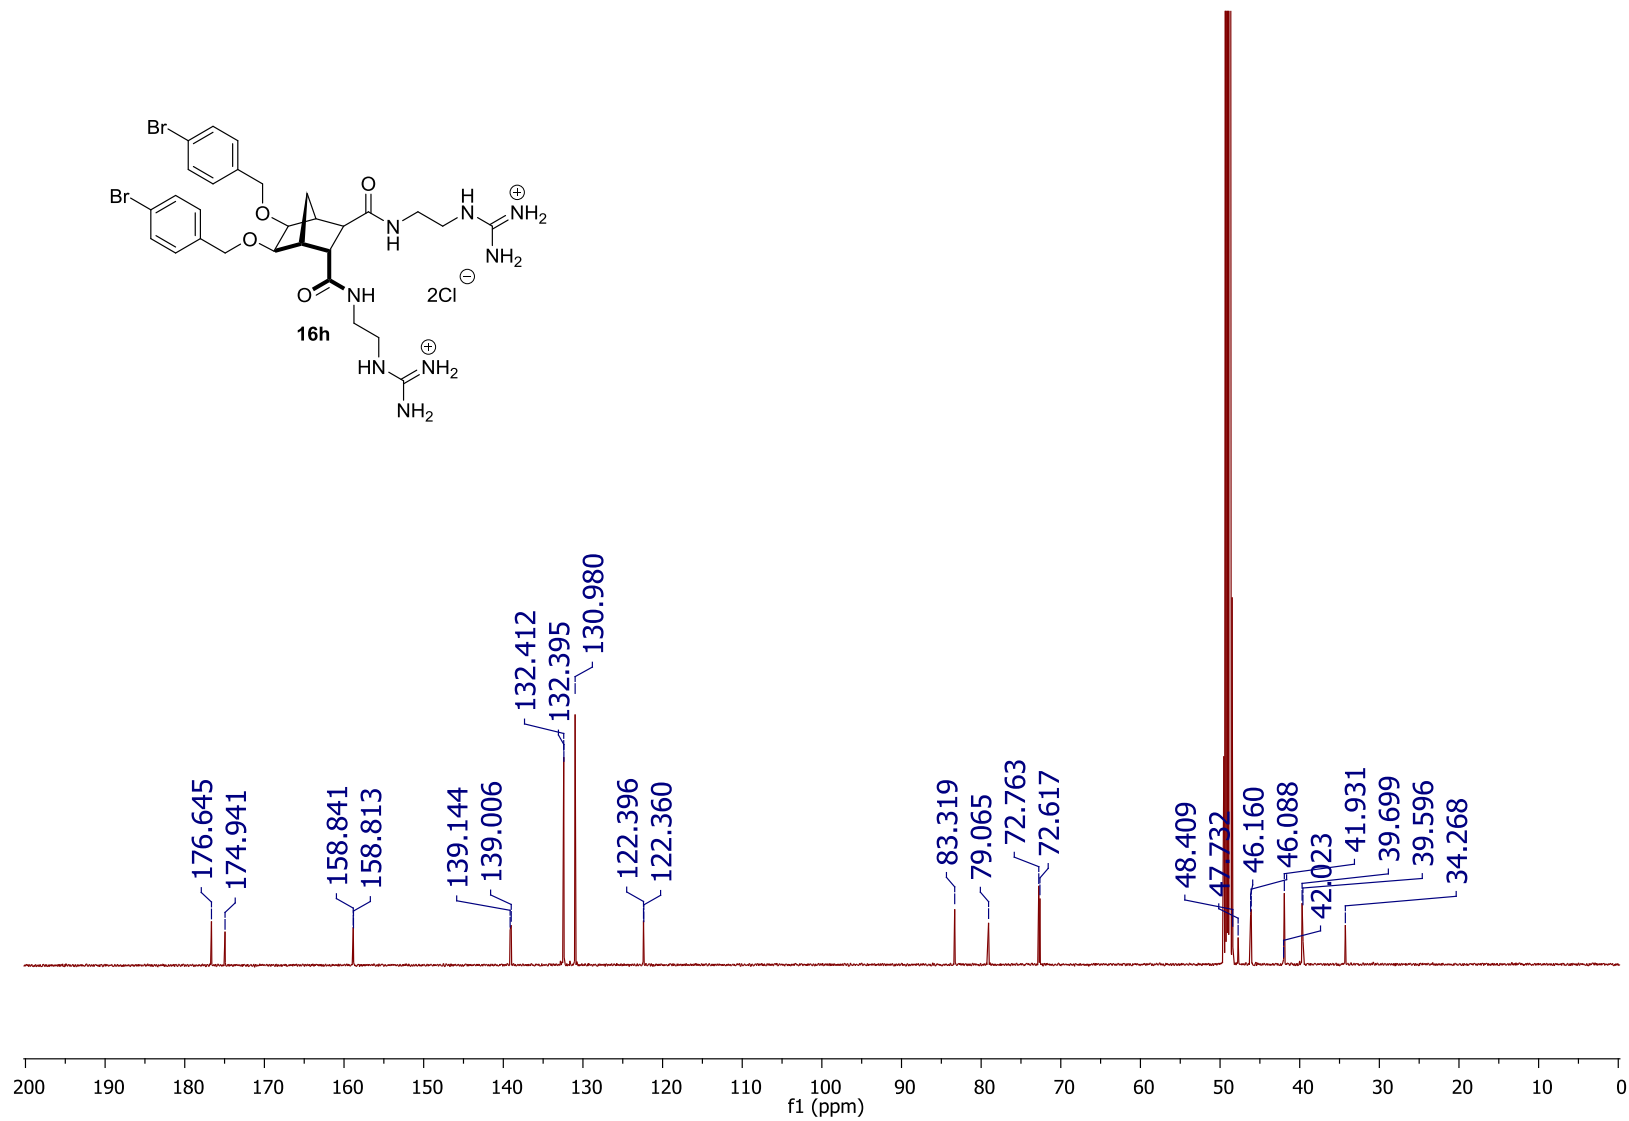

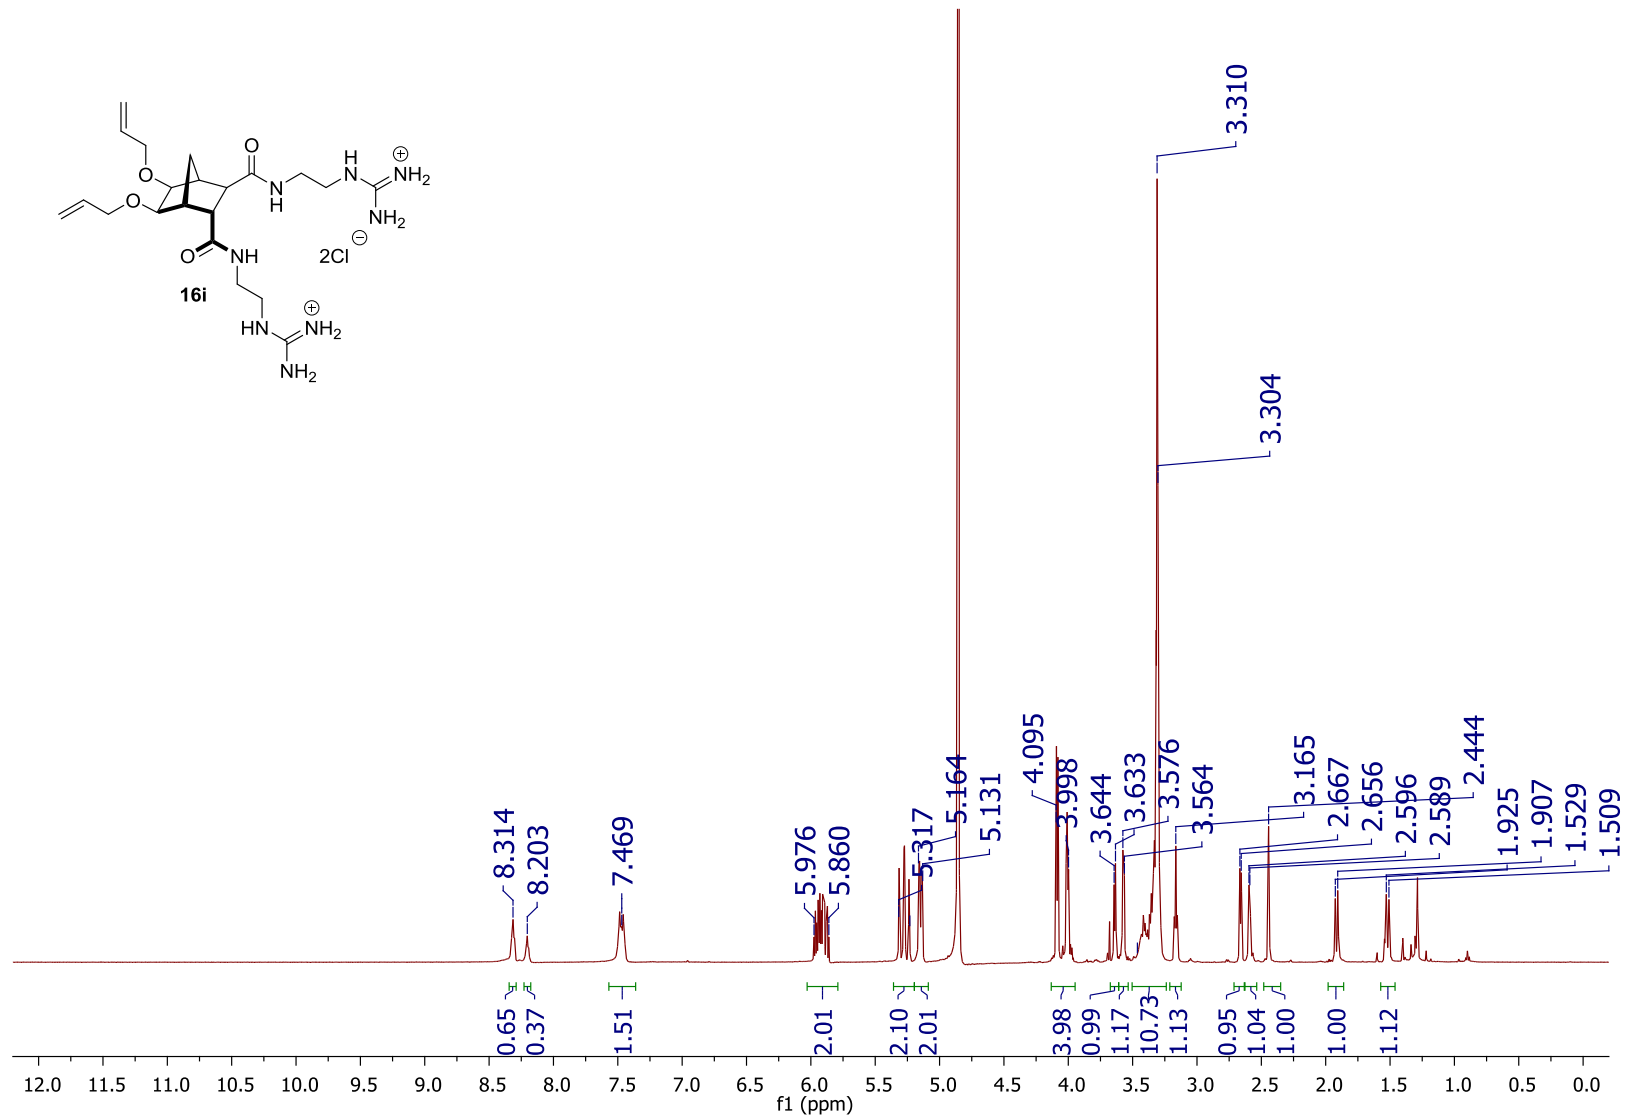

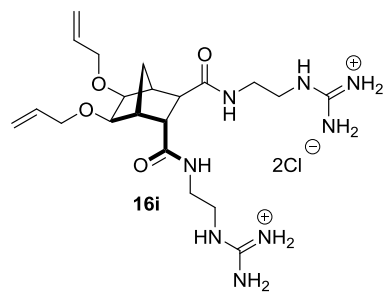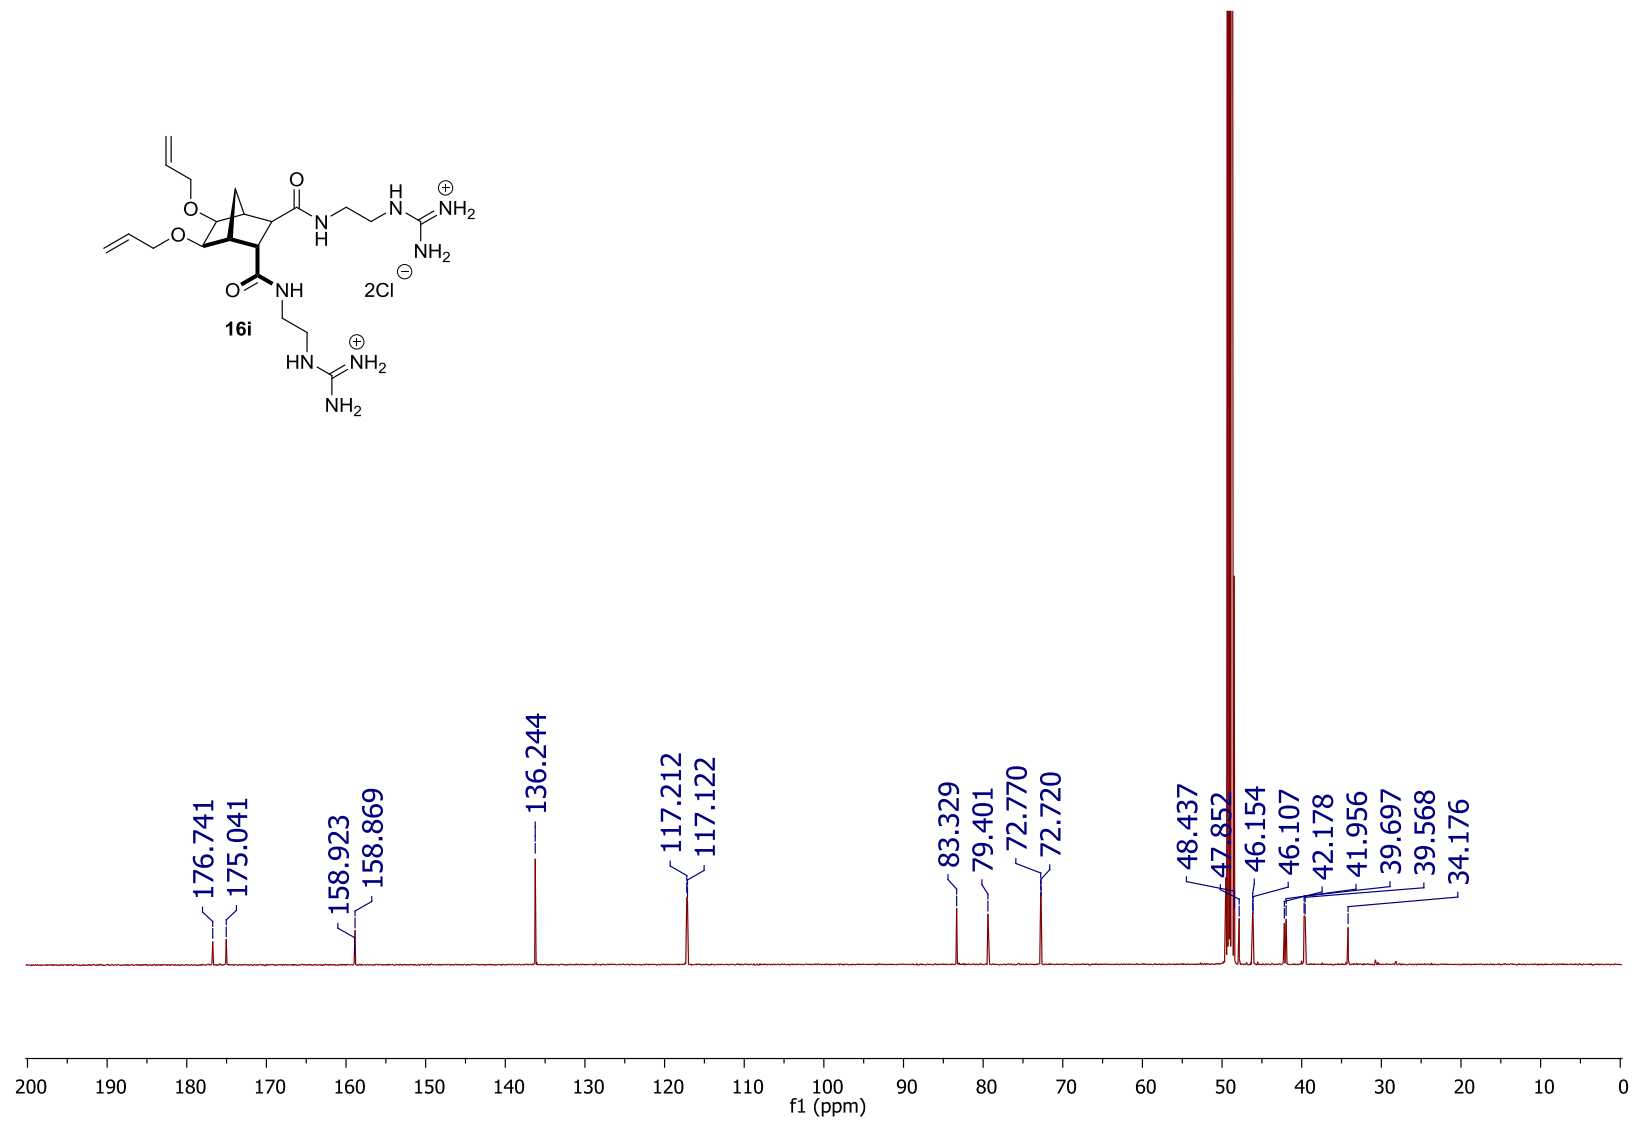



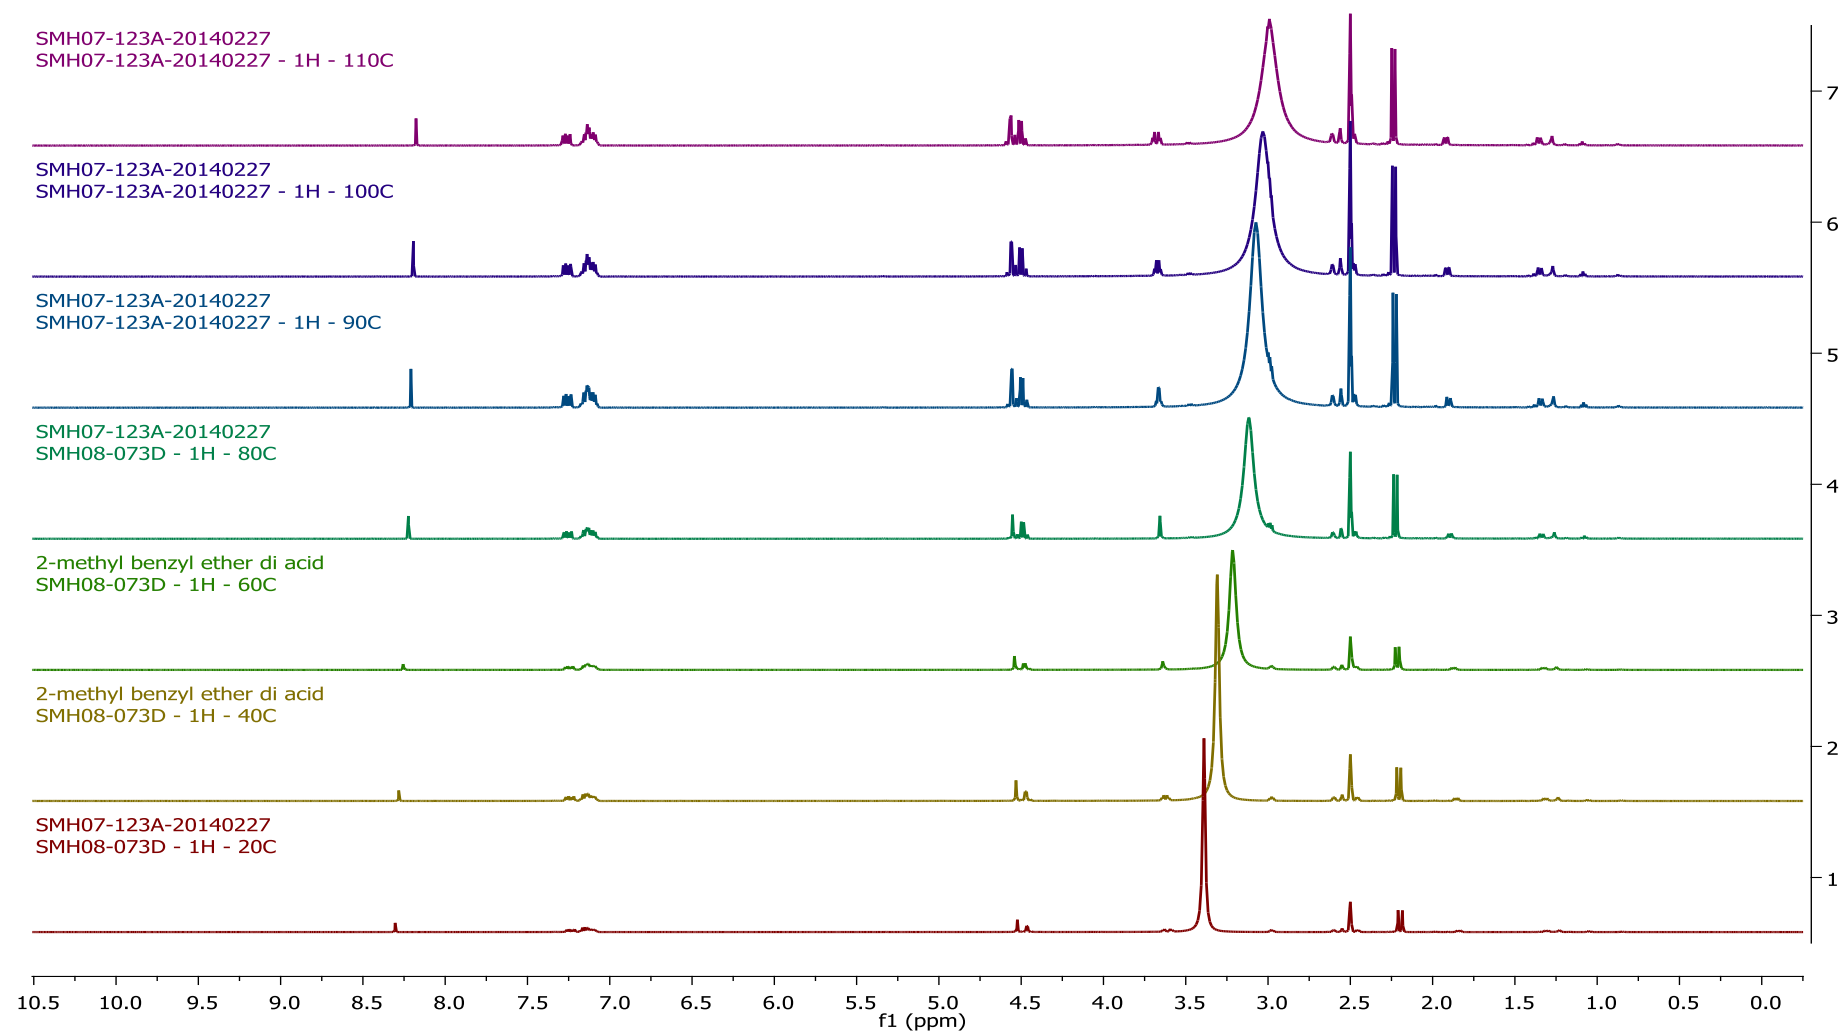

**Figure S1:** VT <sup>1</sup>H NMR (500 MHz) of **12c** in DMSO-*d*<sub>6</sub> (20–110 °C)

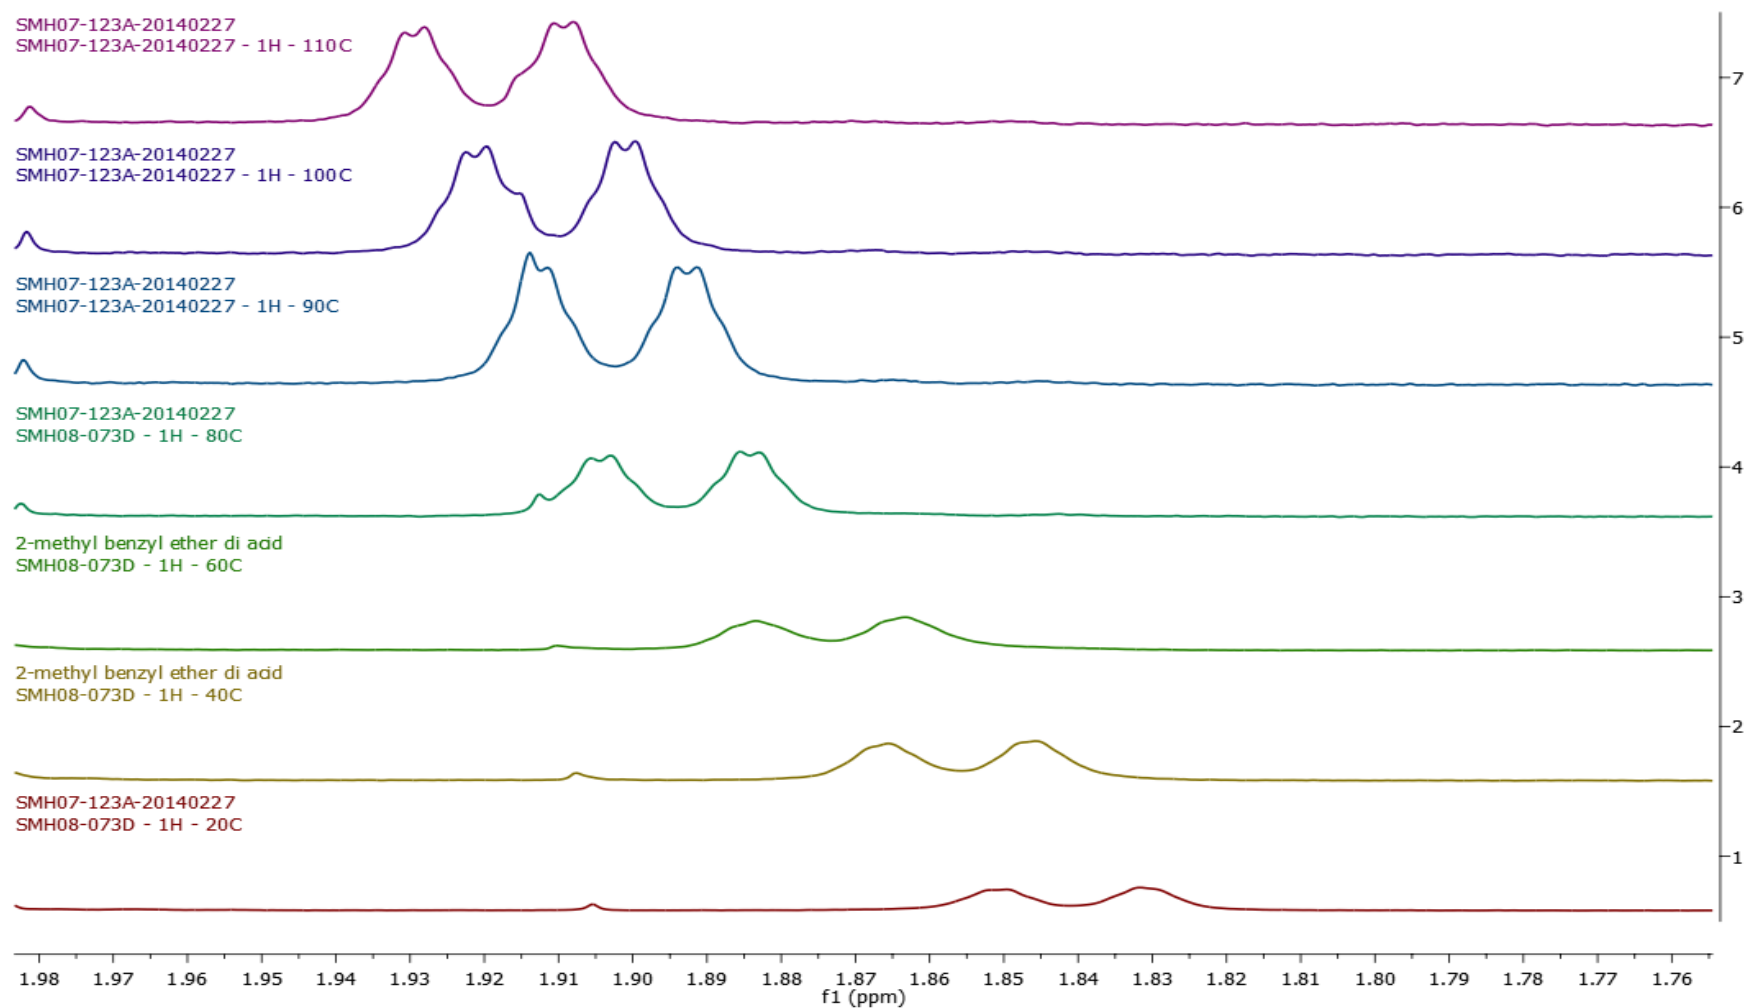

**Figure S2:** Expansion (1.76–1.98 ppm) of VT  $^1\text{H}$  NMR (500 MHz) of **12c** in  $\text{DMSO-}d_6$  (20–110 °C)

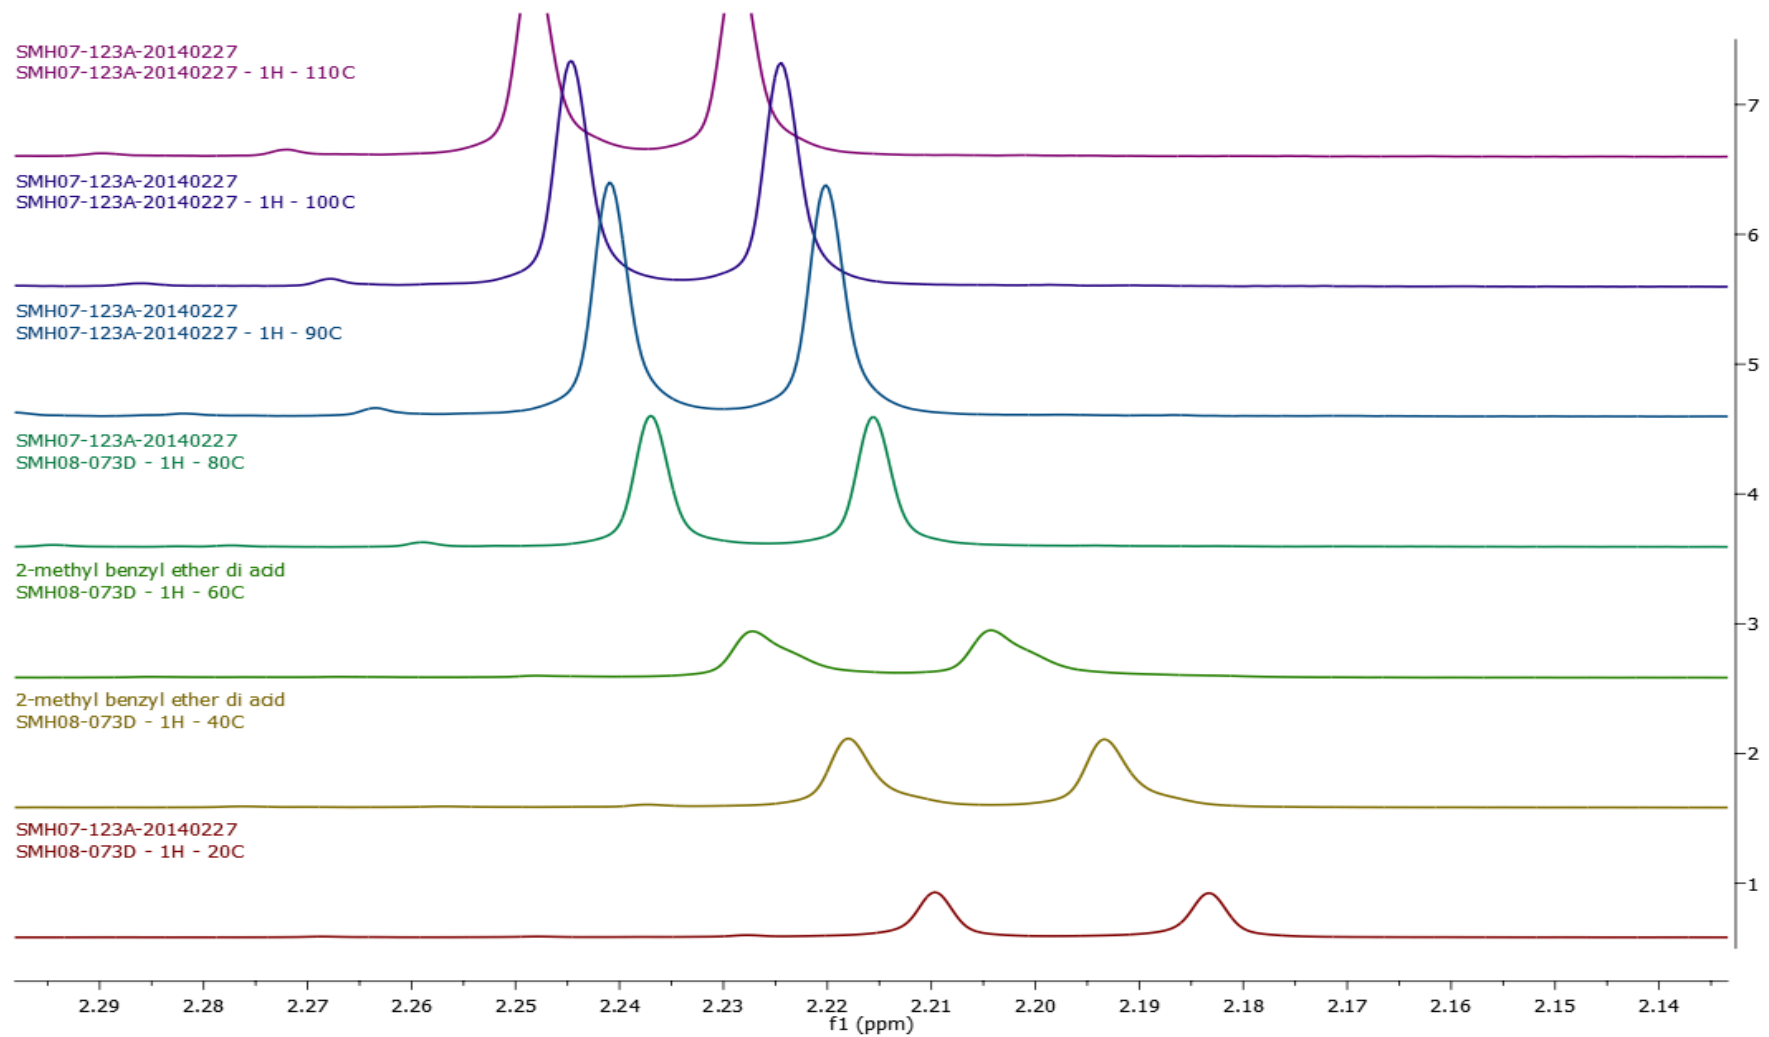

**Figure S3:** Expansion (2.14–2.29 ppm) of VT  $^1\text{H}$  NMR (500 MHz) of **12c** in  $\text{DMSO-}d_6$  (20–110 °C)

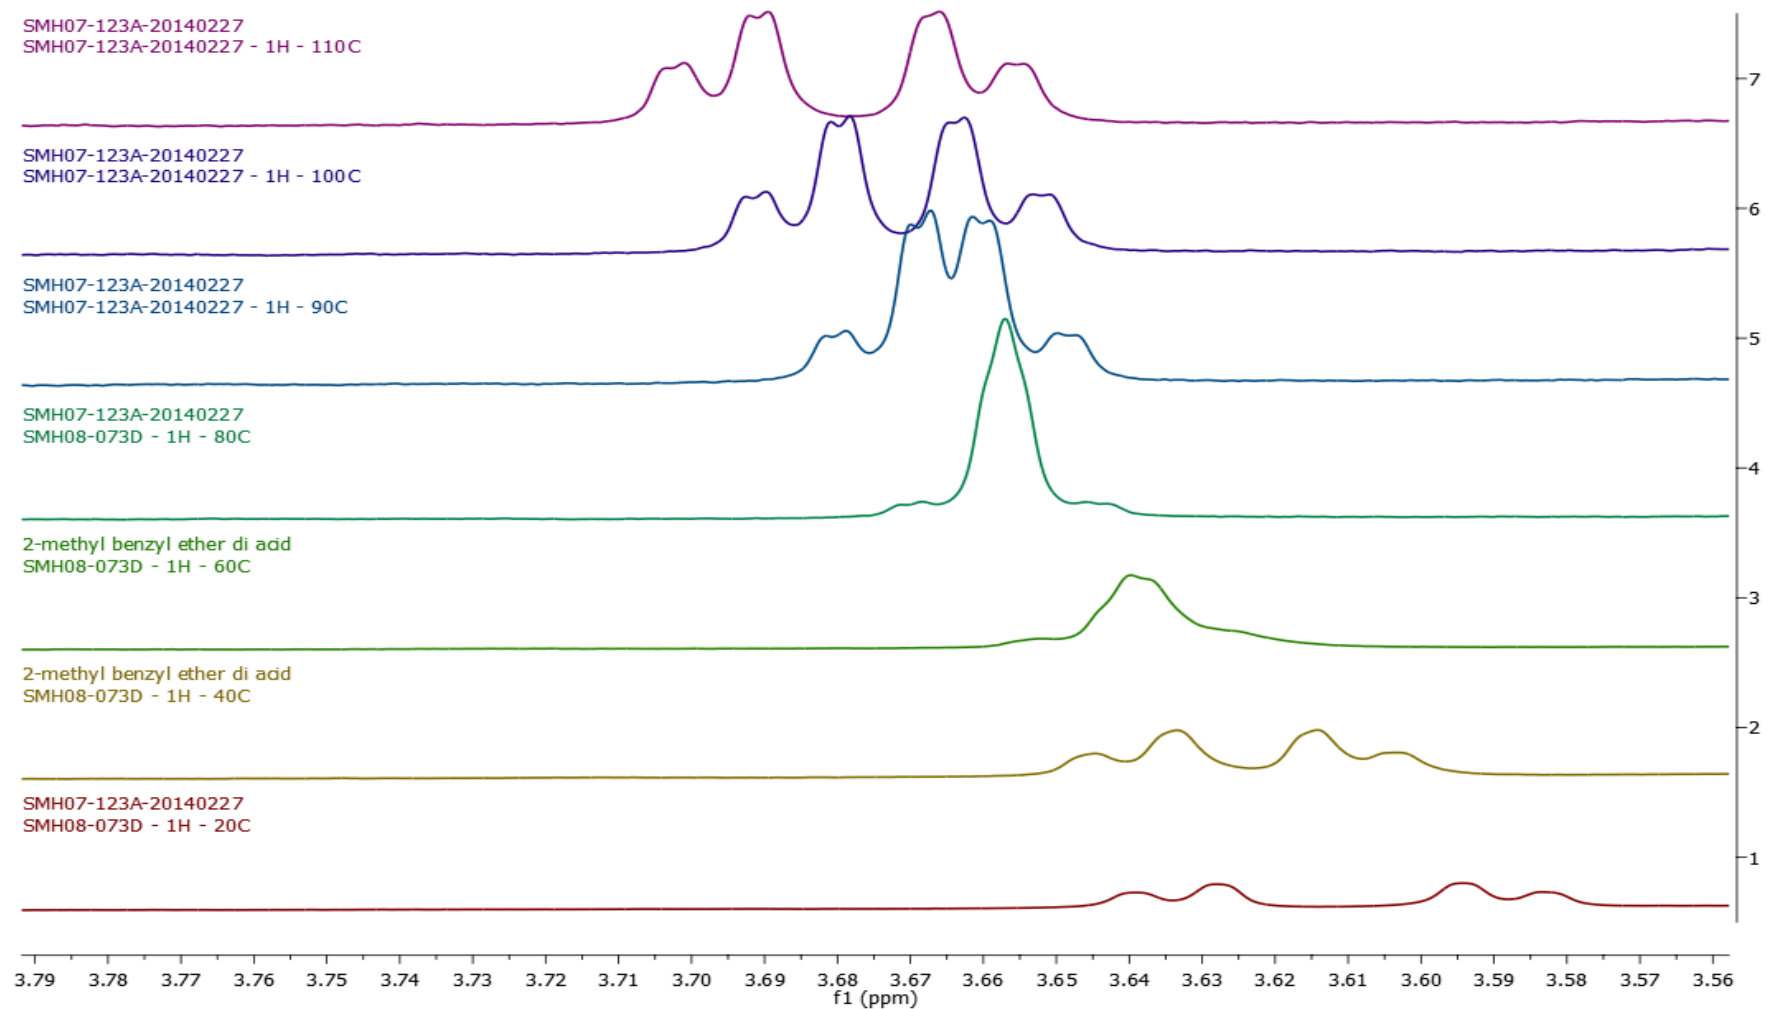

**Figure S4:** Expansion (3.56–3.79 ppm) of VT  $^1\text{H}$  NMR (500 MHz) of **12c** in  $\text{DMSO}-d_6$  (20–110 °C)

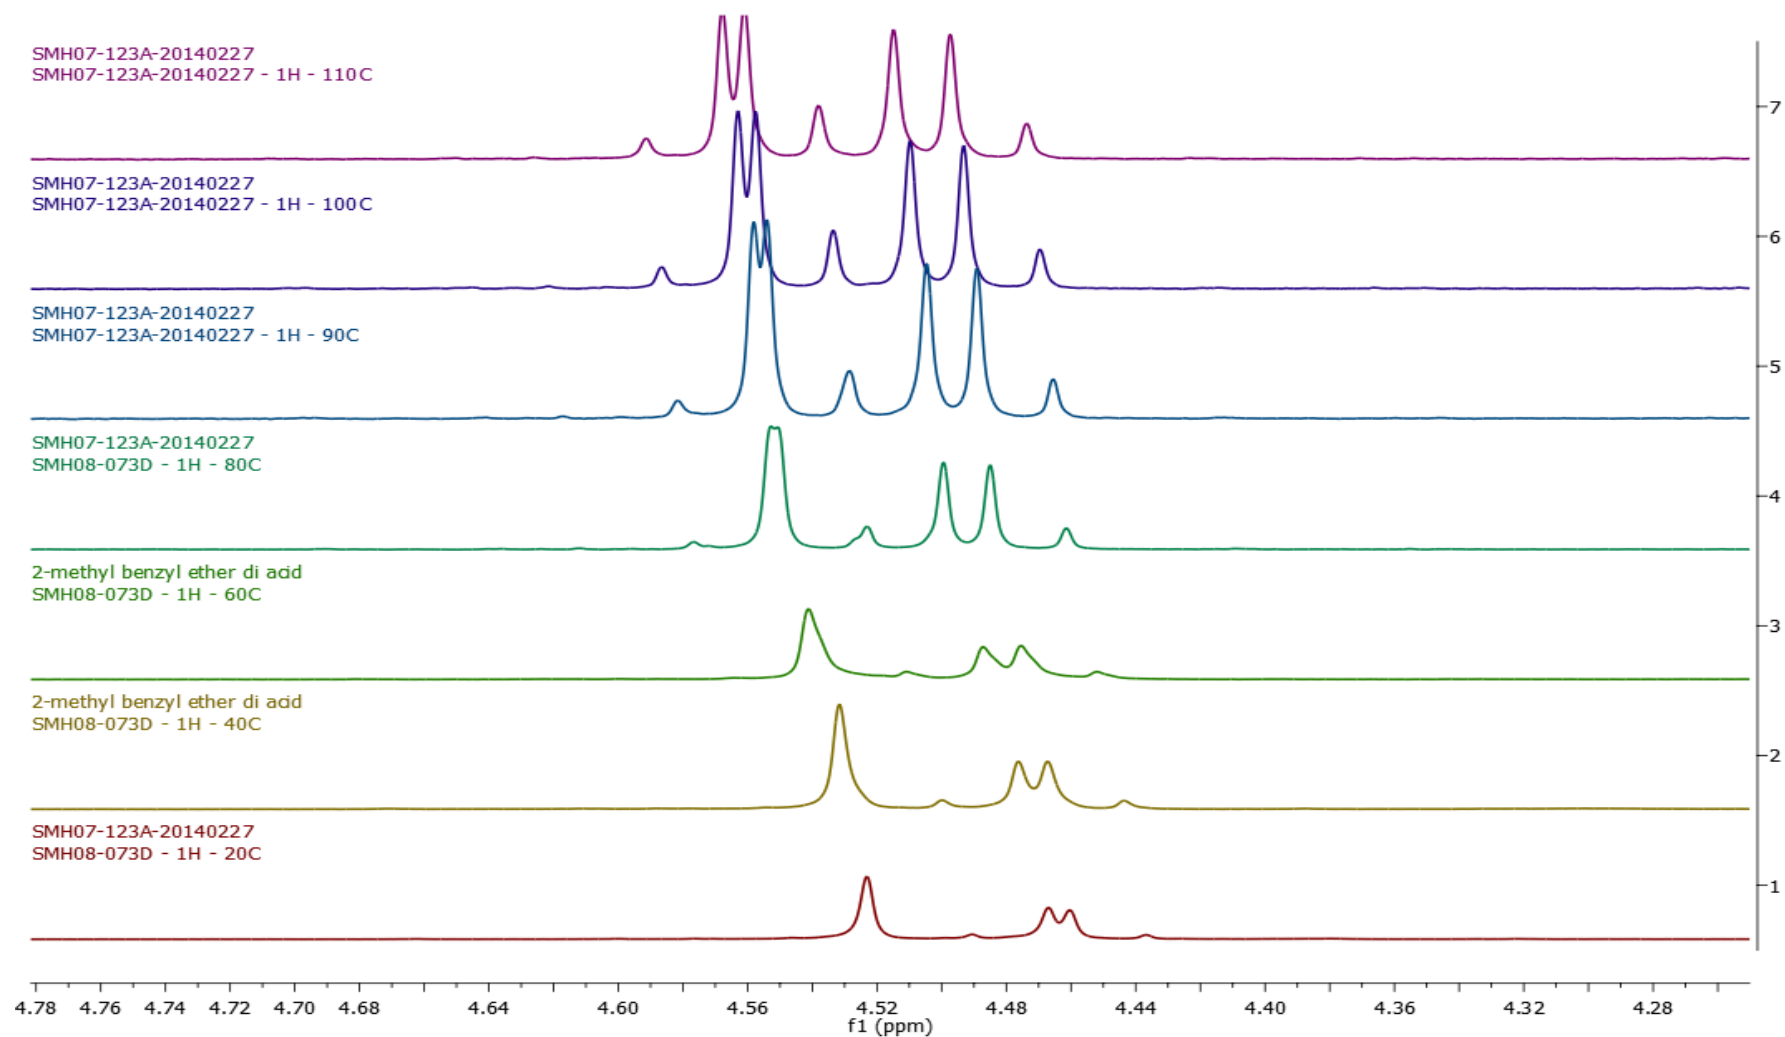

**Figure S5:** Expansion (4.26–4.78 ppm) of VT <sup>1</sup>H NMR (500 MHz) of **12c** in DMSO-*d*<sub>6</sub> (20–110 °C)

| Entry | Alkylating Agent<br>(RX)                                                            | Product    | Yield<br>(%) <sup>a</sup> |
|-------|-------------------------------------------------------------------------------------|------------|---------------------------|
| 1     | MeI                                                                                 | <b>12a</b> | 48                        |
| 2     | 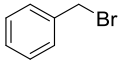   | <b>12b</b> | 37 (7)                    |
| 3     |    | <b>12c</b> | 17                        |
| 4     |    | <b>12d</b> | 51 (6)                    |
| 5     |   | <b>12e</b> | 55 (12)                   |
| 6     |  | <b>12f</b> | 25 (9)                    |
| 7     |  | <b>12g</b> | 24 (8)                    |
| 8     |  | <b>12h</b> | 28 (12)                   |

|    |                                                                                   |            |    |
|----|-----------------------------------------------------------------------------------|------------|----|
| 9  | 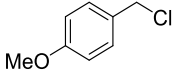 |            | NR |
| 10 |  |            | NR |
| 12 |  |            | NR |
| 13 |  | <b>12i</b> | 25 |

<sup>a)</sup> Yield calculated over two steps.

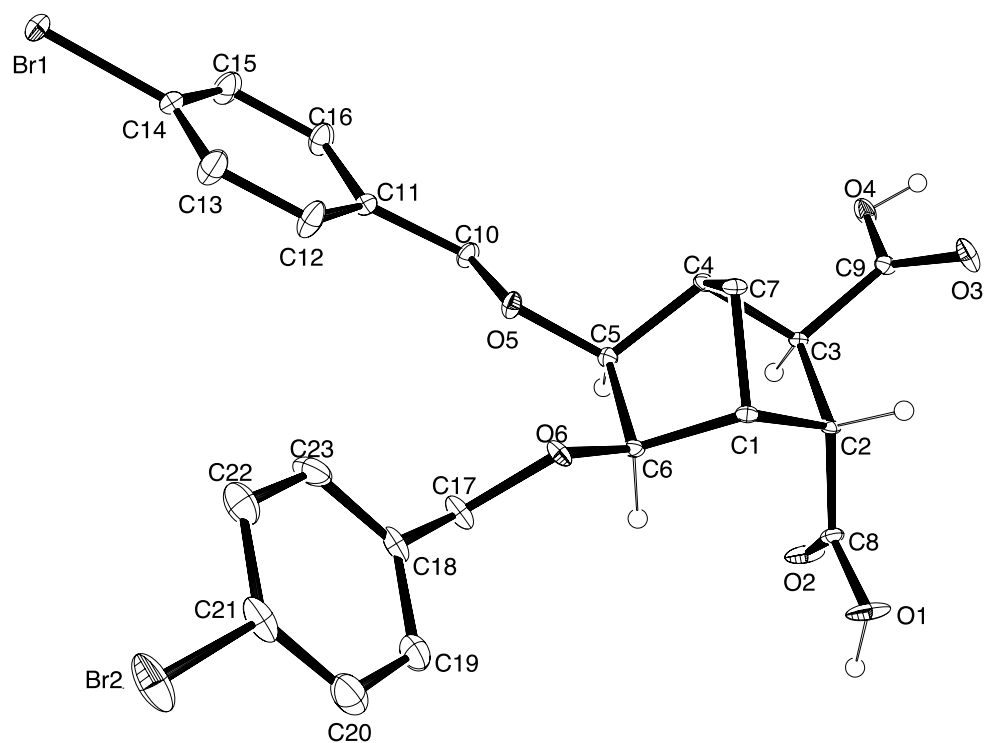

**Figure S6.** Thermal ellipsoid plot of one of the two independent molecules of **12h**. Ellipsoids are at the 20% probability level.

Crystal data for **12h**.  $2(\text{C}_{23}\text{H}_{22}\text{Br}_2\text{O}_6) \cdot (\text{CH}_3\text{CH}_2\text{OH})$ ,  $M = 1138.52$ ,  $T = 130.0$  K,  $\lambda = 1.54180$ ,  $554.22$ , space group  $Pc$ ,  $a = 13.3929(1)$   $b = 5.4658(1)$ ,  $c = 33.5433(4)$   $\text{\AA}$ ,  $\beta = 97.438(1)^\circ$   $V = 2434.81(6)$   $\text{\AA}^3$ ,  $Z = 4$ ,  $Z' = 2$ ,  $D_c = 1.512$   $\text{Mg M}^{-3}$   $\mu(\text{Cu-K}\alpha) = 4.519$   $\text{mm}^{-1}$ ,  $F(000) = 1112$ , crystal size  $0.54 \times 0.49 \times 0.38$   $\text{mm}^3$ , 16695 reflections measured, 8602 independent reflections [ $R(\text{int}) = 0.0230$ ], the final  $R$  was 0.0431 [ $I > 2\sigma(I)$  8569 data] and  $wR(F^2)$  was 0.1162 (all data), Absolute structure parameter 0.15(2).



**Table S2:** Bacterial strains used for Minimum Inhibitory Concentration (MIC) and disk diffusion (DD) assay

| Organism                        | Strain           | Strain description                                              | Assay  |
|---------------------------------|------------------|-----------------------------------------------------------------|--------|
| <i>Escherichia coli</i>         | ATCC 25922       | FDA strain Seattle 1946                                         | MIC    |
| <i>Klebsiella pneumoniae</i>    | ATCC 13883       | Control strain                                                  | DD     |
| <i>Klebsiella pneumoniae</i>    | ATCC 700603      | Multi-drug resistant                                            | MIC    |
| <i>Acinetobacter baumannii</i>  | ATCC 19606       | Type strain                                                     | MIC/DD |
| <i>Pseudomonas aeruginosa</i>   | ATCC 27853       | Type strain                                                     | MIC/DD |
| <i>Staphylococcus aureus</i>    | ATCC 43300       | MRSA (methicillin resistant <i>S. aureus</i> )                  | MIC/DD |
| <i>Enterococcus faecium</i>     | ATCC 700221      | VRE (vancomycin resistant <i>Enterococcus</i> )                 | DD     |
| <i>Staphylococcus aureus</i>    | Clinical isolate | mMRSA (multi-resistant methicillin resistant <i>S. aureus</i> ) | MIC    |
| <i>Staphylococcus aureus</i>    | NARSA-NRS 17     | GISA (glycopeptide-intermediate <i>S. aureus</i> )              | MIC    |
| <i>Staphylococcus aureus</i>    | NARSA-NRS 1      | VISA (vancomycin-intermediate <i>S. aureus</i> )                | MIC    |
| <i>Staphylococcus aureus</i>    | Clinical isolate | MRSA                                                            | MIC    |
| <i>Staphylococcus aureus</i>    | NARSA-VRS 10     | Glycopeptide resistant <i>Staphylococci</i>                     | MIC    |
| <i>Streptococcus pneumoniae</i> | ATCC 700677      | Multi-drug resistant                                            | MIC    |
| <i>Enterococcus faecalis</i>    | Clinical isolate | VanA (vancomycin resistant)                                     | MIC    |

## References

1. G. P. Moss, *Pure Appl. Chem.*, 1999, **71**, 513-529.
2. G. Radau, S. Schermuly and A. Fritsche, *Arch. Pharm.*, 2003, **336**, 300-309.
3. A. Kraus, P. Ghorai, T. Birnkammer, D. Schnell, S. Elz, R. Seifert, S. Dove, G. Bernhardt and A. Buschauer, *ChemMedChem*, 2009, **4**, 232-240.
4. C. Liu, W. Guo, X. Shi, M. A. Kaium, X. Gu and Y. Z. Zhu, *Eur. J. Med. Chem*, 2011, **46**, 3996-4009.
5. S. M. Hickey, T. D. Ashton, S. K. Khosa and F. M. Pfeffer, *Synlett*, 2012, **23**, 1779-1782.
6. M. M. Flook, J. Börner, S. M. Kilyanek, L. C. H. Gerber and R. R. Schrock, *Organometallics*, 2012, **31**, 6231-6243.
7. M. Dejmek, H. Hrebabecky, M. Sala, M. Dracinsky and R. Nencka, *Synthesis*, 2011, 4077-4083.
8. L. C. Henderson, J. Li, R. L. Nation, T. Velkov and F. M. Pfeffer, *Chem. Commun.*, 2010, **46**, 3197-3199.
9. T. J. Donohoe, A. Jahanshahi, M. J. Tucker, F. L. Bhatti, I. A. Roslan, M. Kabeshov and G. Wrigley, *Chem. Commun.*, 2011, **47**, 5849-5851.
